# Supplementary material
Source: PubMed Central journal article supplement (PMC8627326)
Supplement: NIHMS1756639-supplement-Supplemental_Materials.pdf [file NIHMS1756639-supplement-Supplemental_Materials.pdf]

**Title: High-resolution metabolomic assessment of pesticide exposure in Central Valley, California**

**Author:** Qi Yan <sup>1</sup>, Kimberly C Paul <sup>1</sup>, Douglas I Walker <sup>2</sup>, Melissa A. Furlong <sup>3</sup>, Irish Del Rosario <sup>1</sup>, Yu Yu <sup>4</sup>, Keren Zhang <sup>1</sup>, Myles G Cockburn <sup>5</sup>, Dean P Jones <sup>6,7</sup>, Beate R Ritz <sup>1,8,\*</sup>

2 Department of Environmental Medicine and Public Health, Icahn School of Medicine at Mount Sinai, New York, NY

**Affiliations:**

<sup>1</sup> Department of Epidemiology, UCLA Fielding School of Public Health, Los Angeles, CA, USA

<sup>2</sup> Department of Environmental Medicine and Public Health, Icahn School of Medicine at Mount Sinai, New York, NY, USA

<sup>3</sup> Department of Community, Environment, and Policy, University of Arizona Mel and Enid Zuckerman College of Public Health, Tucson, AZ, USA

<sup>4</sup> Department of Environmental Health Science, UCLA Fielding School of Public Health, Los Angeles, CA, USA

<sup>5</sup> Department of Preventive Medicine, Keck School of Medicine, University of Southern California, CA, USA

<sup>6</sup> Clinical Biomarkers Laboratory, Division of Pulmonary, Allergy, and Critical Care Medicine, School of Medicine, Emory University, Atlanta, GA, USA

<sup>7</sup> Department of Medicine, Emory University, Atlanta, GA, USA

<sup>8</sup> Department of Neurology, UCLA School of Medicine, CA 90095, USA

**Contact Information:**

Beate Ritz

Mailing address: 650 Charles E Young Dr S, Los Angeles, CA 90095

Telephone number: +1-310-206-7458

Email address: [britz@ucla.edu](mailto:britz@ucla.edu)

**Table of Contents**

**Supplemental Figure S1.** Heatmap of pairwise correlations of pesticide counts. The heat map color-codes the pairwise *Pearson* correlations of organophosphates (OP), pyrethroids (PYR), and organochlorines (OC) counts. The shades of color (blue, white, and red) visualize correlation values from -1 to 1. Each square reports a *Pearson* correlation coefficient.....S3

**Supplemental Figure S2.** Identification of metabolic features associated with pesticide exposure. **(a)** Type 1 Manhattan plot for OP-associated features in the HILIC column (positive ion mode), VIP score vs. m/z. Red dots represent features positively associated with OP exposure and green dots represent features negatively associated with OP exposure; **b)** Type 1 Manhattan plot for OP-associated features in the C18 column (negative ion mode), VIP score vs. mass-to-charge; **c)** Type 1 Manhattan plot for PYR-associated features in the HILIC column (positive ion mode); **d)** Type 1 Manhattan plot for PYR-associated features in the C18 column (negative ion mode); **e)** Type 1 Manhattan plot for OC-associated features in the HILIC column (positive ion mode); **f)** Type 1 Manhattan plot for OC-associated features in the C18 column (negative ion mode).....S4

**Supplemental Figure S3.** Enriched pathways identified from the sensitivity analysis by additionally adjusting for education. The vertical axis represents the pathways associated with pesticides. Circle radius is proportional to the number of correlated metabolite features within each pathway (ratio). The horizontal axis also represents the ratio. The color represents the negative  $\log_{10}$  (*p-value*) of each pathway.....S5

**Table S1. List of chemicals within OP, PYR, or OC groups.....S6**

**Table S2. Significant HILICpos features.....S8**

**Table S3. Significant C18neg features.....S19**

Table S4. Annotated Metabolites within each enriched pathway based on mummichog.....S25

Table S5. Enriched pathways associated with pesticide exposures.....S27

Table S6. Enriched metabolic pathways associated with xMWAS cluster 1 (OP).....S28

Table S7. Enriched metabolic pathways associated with xMWAS cluster 2 (PYR, OC).....S29

Supplemental Table S8. Pathway enrichment analysis for features associated with all three pesticides in xMWAS.....S30

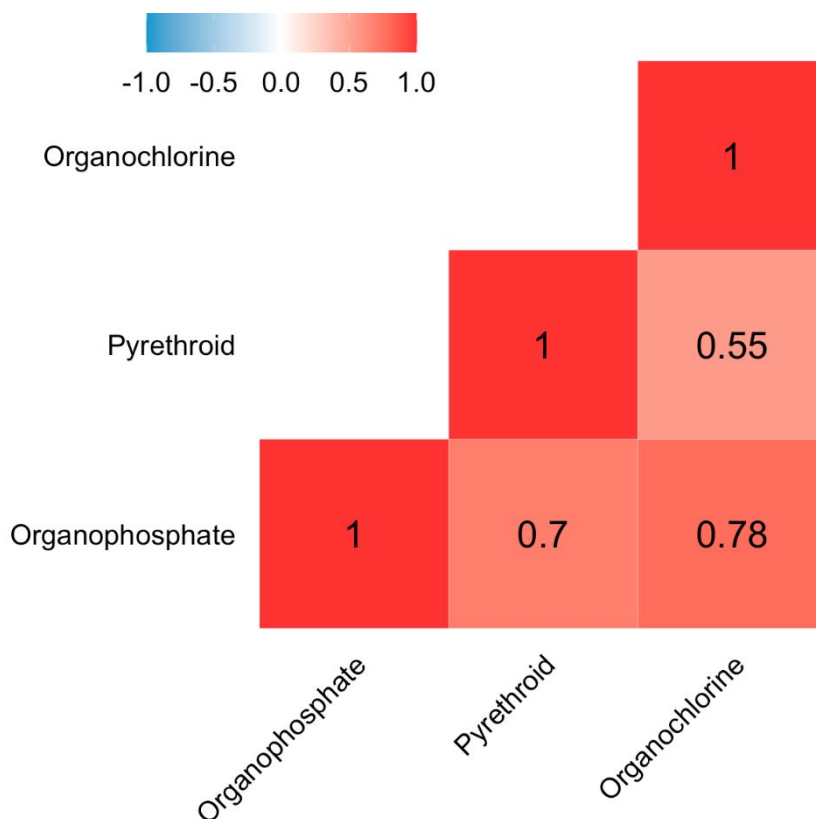

**Figure S1. Heatmap of pairwise correlations of pesticide counts.** The heatmap color-codes the pairwise *Pearson* correlations of organophosphates (OP), pyrethroids (PYR), and organochlorines (OC) counts. The shades of color (blue, white, and red) visualize correlation values from -1 to 1. Each square reports a *Pearson* correlation coefficient.

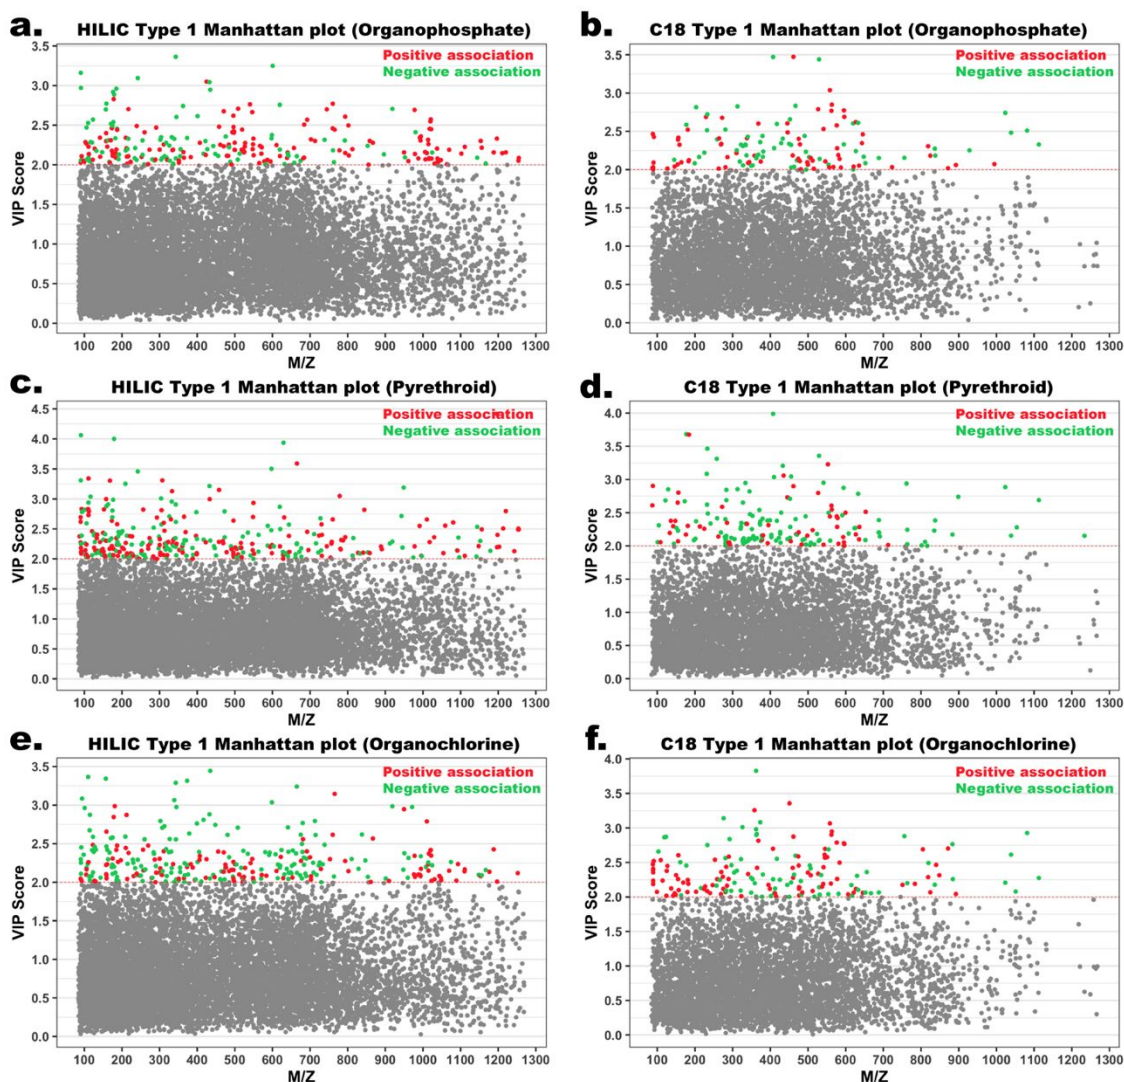

**Figure S2.** Identification of metabolic features associated with pesticide exposure. **(a)** Type 1 Manhattan plot for OP-associated features in the HILIC column (positive ion mode), VIP score vs. m/z. Red dots represent features positively associated with OP exposure and green dots represent features negatively associated with OP exposure; **b)** Type 1 Manhattan plot for OP-associated features in the C18 column (negative ion mode), VIP score vs. mass-to-charge; **c)** Type 1 Manhattan plot for PYR-associated features in the HILIC column (positive ion mode); **d)** Type 1 Manhattan plot for PYR-associated features in the C18 column (negative ion mode); **e)** Type 1 Manhattan plot for OC-associated features in the HILIC column (positive ion mode); **f)** Type 1 Manhattan plot for OC-associated features in the C18 column (negative ion mode).

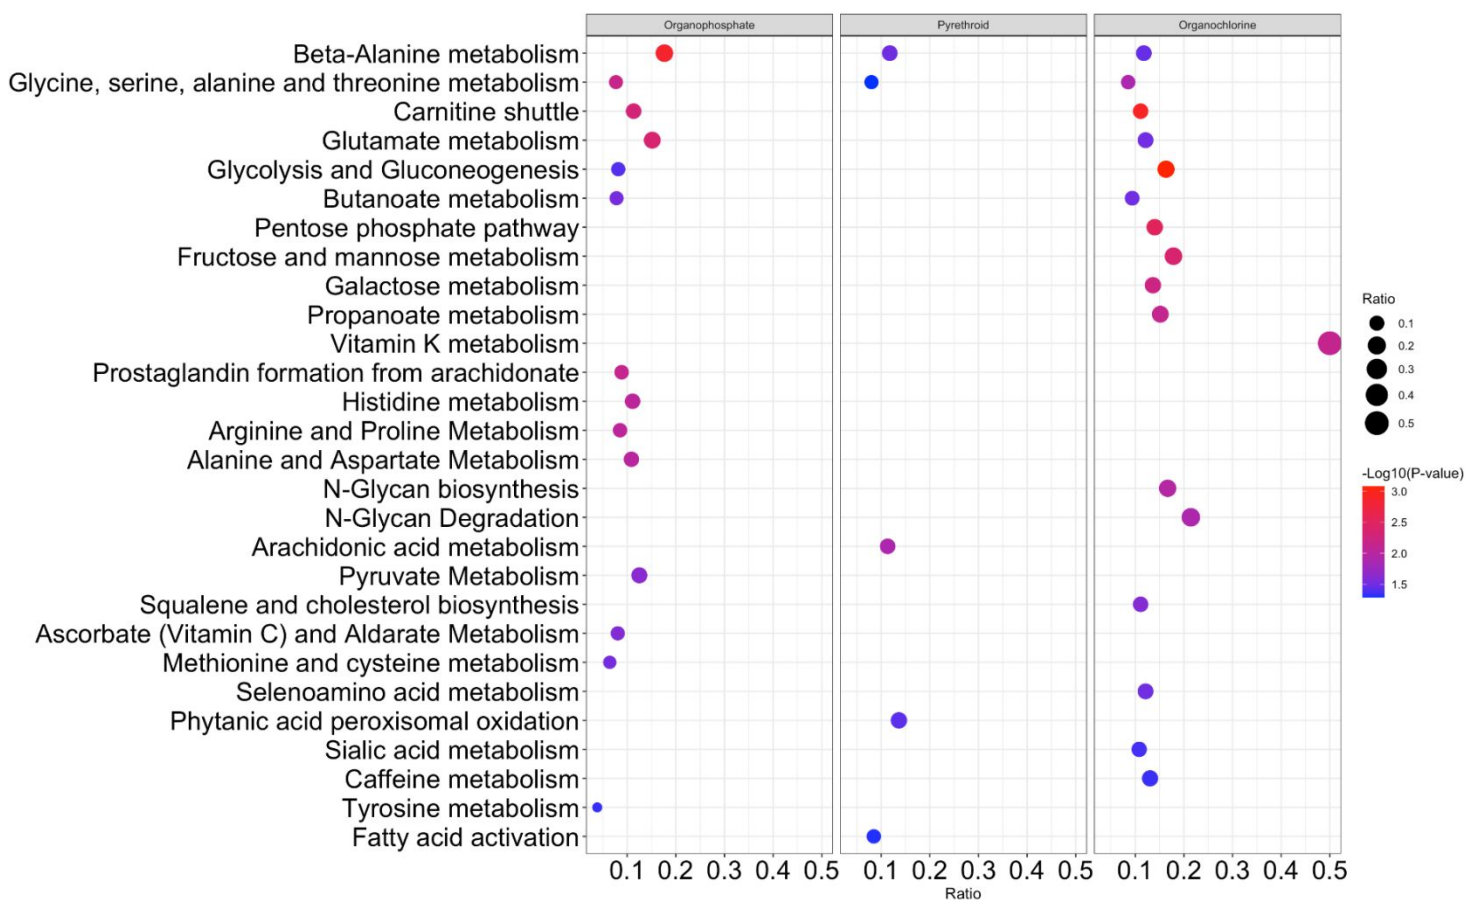

**Figure S3.** Enriched pathways identified from the sensitivity analysis by additionally adjusting for education. The vertical axis represents the pathways associated with pesticides. Circle radius is proportional to the number of correlated metabolite features within each pathway (ratio). The horizontal axis also represents the ratio. The color represents the negative log<sub>10</sub> (*p*-value) of each pathway.

**Table S1. List of chemicals within OP, PYR, or OC groups**

| <b>Pesticide group</b> | <b>Name</b>                        | <b>Chemcode</b> |
|------------------------|------------------------------------|-----------------|
|                        | Monocrotophos                      | 52              |
|                        | Bensulide                          | 70              |
|                        | Dicrotophos                        | 72              |
|                        | Trichlorfon                        | 88              |
|                        | Carbophenothion                    | 110             |
|                        | Ddvp                               | 187             |
|                        | S,S,S-Tributyl Phosphorotrithioate | 190             |
|                        | Dioxathion                         | 192             |
|                        | Diazinon                           | 198             |
|                        | Dimethoate                         | 216             |
|                        | Disulfoton                         | 230             |
|                        | Chlorpyrifos                       | 253             |
|                        | Ethion                             | 268             |
|                        | Merphos                            | 293             |
|                        | Azinphos-Methyl                    | 314             |
|                        | Phosmet                            | 335             |
|                        | Malathion                          | 367             |
| <b>OPs</b>             | Oxydemeton-Methyl                  | 382             |
|                        | Methyl Parathion                   | 394             |
|                        | Naled                              | 418             |
|                        | Parathion                          | 459             |
|                        | Phorate                            | 478             |
|                        | Phosalone                          | 479             |
|                        | Mevinphos                          | 480             |
|                        | Phosphamidon                       | 482             |
|                        | Sulfotep                           | 558             |
|                        | Demeton                            | 566             |
|                        | Tepp                               | 577             |
|                        | Ethephon                           | 1626            |
|                        | Leptophos                          | 1676            |
|                        | Acephate                           | 1685            |
|                        | Methidathion                       | 1689            |
|                        | Methamidophos                      | 1697            |
|                        | Dialifor                           | 1799            |
|                        | Fenamiphos                         | 1857            |
|                        | Profenofos                         | 2042            |
|                        | Fenvalerate                        | 1963            |
|                        | Permethrin                         | 2008            |
|                        | Phenothrin                         | 2093            |
| <b>PYRs</b>            | Resmethrin                         | 2119            |
|                        | Flucythrinate                      | 2168            |
|                        | Cypermethrin                       | 2171            |
|                        | Tau-Fluvalinate                    | 2195            |
|                        | Cyfluthrin                         | 2223            |

|            |                    |      |
|------------|--------------------|------|
|            | Fenpropathrin      | 2234 |
|            | Lambda-Cyhalothrin | 2297 |
|            | Bifenthrin         | 2300 |
|            | Esfenvalerate      | 2321 |
|            | Tralomethrin       | 2329 |
|            | (S)-Cypermethrin   | 3866 |
|            | Chlordane          | 130  |
|            | Dieldrin           | 210  |
|            | Endosulfan         | 259  |
| <b>OCs</b> | Dicofol            | 346  |
|            | Lindane            | 359  |
|            | Methoxychlor       | 384  |
|            | Dienochlor         | 468  |
|            | Toxaphene          | 594  |

Table S2. Significant HILICpos features

| m/z     | time<br>(s) | vip_O<br>P | coef_O<br>P | pvalue_<br>OP | vip_PY<br>R | coef_PY<br>R | pvalue_P<br>YR | vip_O<br>C | coef_O<br>C | pvalue_O<br>C |
|---------|-------------|------------|-------------|---------------|-------------|--------------|----------------|------------|-------------|---------------|
| 87.0553 | 114.7       | 1.743      | 0.012       | 0.043         | 2.375       | 0.064        | 0.023          | 1.180      | 0.031       | 0.288         |
| 90.0392 | 98.6        | 1.870      | 0.014       | 0.033         | 2.694       | 0.090        | 0.005          | 1.745      | 0.057       | 0.082         |
| 90.0609 | 100.5       | 2.030      | 0.018       | 0.012         | 2.274       | 0.089        | 0.014          | 1.615      | 0.066       | 0.071         |
| 90.0709 | 98.5        | 1.911      | 0.015       | 0.025         | 2.619       | 0.091        | 0.007          | 2.045      | 0.075       | 0.027         |
| 90.507  | 280.4       | 3.161      | -0.012      | 0.000         | 3.310       | -0.057       | 0.000          | 2.298      | -0.041      | 0.011         |
| 90.9712 | 84          | 0.210      | 0.001       | 0.923         | 2.249       | -0.088       | 0.015          | 0.700      | 0.026       | 0.472         |
| 90.9821 | 97.8        | 1.305      | -0.010      | 0.125         | 1.607       | -0.055       | 0.083          | 2.253      | -0.080      | 0.011         |
| 91.0059 | 269.7       | 2.057      | -0.010      | 0.015         | 1.763       | -0.039       | 0.059          | 1.440      | -0.034      | 0.109         |
| 91.0275 | 289.3       | 2.970      | -0.020      | 0.000         | 4.062       | -0.118       | 0.000          | 2.110      | -0.065      | 0.018         |
| 91.052  | 98.5        | 1.837      | 0.015       | 0.039         | 2.111       | 0.067        | 0.056          | 1.625      | 0.055       | 0.117         |
| 91.0947 | 22.5        | 1.476      | 0.007       | 0.132         | 2.182       | 0.052        | 0.023          | 0.960      | 0.022       | 0.350         |
| 91.98   | 72.4        | 0.970      | -0.008      | 0.244         | 0.408       | -0.008       | 0.818          | 2.452      | -0.099      | 0.005         |
| 92.0592 | 98.6        | 1.720      | 0.014       | 0.058         | 2.088       | 0.068        | 0.052          | 1.577      | 0.052       | 0.144         |
| 93.024  | 287.8       | 1.178      | -0.005      | 0.204         | 2.387       | -0.050       | 0.011          | 1.045      | -0.021      | 0.287         |
| 93.0448 | 134.6       | 2.109      | 0.013       | 0.011         | 2.833       | 0.073        | 0.004          | 2.018      | 0.056       | 0.026         |
| 94.0809 | 283         | 1.927      | -0.015      | 0.024         | 2.783       | -0.092       | 0.003          | 3.085      | -0.108      | 0.001         |
| 95.0685 | 64.4        | 1.241      | 0.013       | 0.136         | 2.112       | 0.100        | 0.022          | 0.987      | 0.049       | 0.271         |
| 97.9914 | 291.2       | 0.379      | -0.002      | 0.682         | 0.713       | 0.014        | 0.464          | 2.357      | -0.049      | 0.009         |
| 98.0237 | 115.1       | 2.052      | 0.018       | 0.014         | 2.118       | 0.071        | 0.049          | 1.252      | 0.044       | 0.231         |
| 100.039 | 3           | 2.039      | 0.016       | 0.022         | 1.538       | 0.051        | 0.133          | 1.670      | 0.062       | 0.073         |
| 100.956 | 9           | 2.039      | 0.016       | 0.022         | 1.538       | 0.051        | 0.133          | 1.670      | 0.062       | 0.073         |
| 102.091 | 273.9       | 1.693      | -0.008      | 0.041         | 2.820       | -0.060       | 0.002          | 2.963      | -0.067      | 0.001         |
| 102.091 | 3           | 2.039      | 0.016       | 0.022         | 1.538       | 0.051        | 0.133          | 1.670      | 0.062       | 0.073         |
| 102.528 | 274.5       | 1.546      | -0.014      | 0.088         | 2.260       | -0.096       | 0.018          | 1.576      | -0.069      | 0.093         |
| 102.528 | 9           | 2.039      | 0.016       | 0.022         | 1.538       | 0.051        | 0.133          | 1.670      | 0.062       | 0.073         |
| 103.086 | 288.9       | 1.816      | -0.012      | 0.033         | 2.098       | -0.064       | 0.024          | 0.962      | -0.031      | 0.282         |
| 103.086 | 6           | 2.286      | 0.015       | 0.007         | 2.146       | 0.063        | 0.022          | 1.515      | 0.047       | 0.088         |
| 104.052 | 20.9        | 2.286      | 0.015       | 0.007         | 2.146       | 0.063        | 0.022          | 1.515      | 0.047       | 0.088         |
| 104.052 | 9           | 2.039      | 0.016       | 0.022         | 1.538       | 0.051        | 0.133          | 1.670      | 0.062       | 0.073         |
| 105.069 | 75.9        | 1.186      | 0.009       | 0.269         | 2.053       | 0.075        | 0.049          | 1.259      | 0.044       | 0.255         |
| 105.069 | 9           | 2.039      | 0.016       | 0.022         | 1.538       | 0.051        | 0.133          | 1.670      | 0.062       | 0.073         |
| 105.758 | 139.6       | 1.643      | 0.014       | 0.057         | 0.299       | 0.010        | 0.784          | 2.099      | 0.087       | 0.021         |
| 105.758 | 3           | 2.266      | 0.023       | 0.007         | 2.240       | 0.100        | 0.016          | 2.171      | 0.102       | 0.014         |
| 105.993 | 110.7       | 2.266      | 0.023       | 0.007         | 2.240       | 0.100        | 0.016          | 2.171      | 0.102       | 0.014         |
| 105.993 | 8           | 2.471      | -0.024      | 0.003         | 2.592       | -0.111       | 0.006          | 2.185      | -0.100      | 0.015         |
| 105.995 | 199         | 2.471      | -0.024      | 0.003         | 2.592       | -0.111       | 0.006          | 2.185      | -0.100      | 0.015         |
| 105.995 | 7           | 1.048      | 0.011       | 0.208         | 2.070       | 0.092        | 0.025          | 0.491      | 0.022       | 0.596         |
| 106.023 | 86          | 1.048      | 0.011       | 0.208         | 2.070       | 0.092        | 0.025          | 0.491      | 0.022       | 0.596         |
| 106.023 | 2           | 2.039      | 0.016       | 0.022         | 1.538       | 0.051        | 0.133          | 1.670      | 0.062       | 0.073         |
| 106.045 | 290.5       | 1.655      | -0.012      | 0.047         | 1.616       | -0.050       | 0.084          | 2.187      | -0.072      | 0.013         |
| 106.045 | 7           | 2.039      | 0.016       | 0.022         | 1.538       | 0.051        | 0.133          | 1.670      | 0.062       | 0.073         |
| 106.068 | 87.6        | 1.541      | -0.009      | 0.095         | 2.024       | -0.052       | 0.039          | 0.930      | -0.026      | 0.315         |
| 106.068 | 4           | 2.039      | 0.016       | 0.022         | 1.538       | 0.051        | 0.133          | 1.670      | 0.062       | 0.073         |
| 107.070 | 23.1        | 1.933      | 0.009       | 0.022         | 0.522       | 0.011        | 0.599          | 2.166      | 0.050       | 0.014         |
| 107.070 | 3           | 2.069      | -0.015      | 0.014         | 0.516       | -0.017       | 0.582          | 1.498      | -0.052      | 0.093         |
| 108.570 | 267.6       | 2.069      | -0.015      | 0.014         | 0.516       | -0.017       | 0.582          | 1.498      | -0.052      | 0.093         |
| 108.570 | 8           | 1.898      | -0.019      | 0.020         | 0.568       | -0.024       | 0.543          | 2.239      | -0.103      | 0.011         |
| 109.542 | 179.6       | 1.898      | -0.019      | 0.020         | 0.568       | -0.024       | 0.543          | 2.239      | -0.103      | 0.011         |
| 109.542 | 8           | 1.165      | 0.012       | 0.154         | 2.036       | 0.091        | 0.027          | 0.742      | 0.031       | 0.457         |
| 110.060 | 210.9       | 1.165      | 0.012       | 0.154         | 2.036       | 0.091        | 0.027          | 0.742      | 0.031       | 0.457         |
| 110.060 | 1           | 2.529      | -0.021      | 0.004         | 0.927       | -0.035       | 0.340          | 3.366      | -0.137      | 0.000         |
| 110.071 | 272.5       | 2.529      | -0.021      | 0.004         | 0.927       | -0.035       | 0.340          | 3.366      | -0.137      | 0.000         |
| 110.071 | 3           | 1.973      | 0.008       | 0.017         | 2.833       | 0.049        | 0.004          | 1.950      | 0.037       | 0.032         |
| 111.060 | 135.4       | 1.973      | 0.008       | 0.017         | 2.833       | 0.049        | 0.004          | 1.950      | 0.037       | 0.032         |
| 111.060 | 8           | 2.089      | -0.010      | 0.024         | 2.938       | -0.070       | 0.002          | 1.513      | -0.036      | 0.111         |
| 111.068 | 288.7       | 2.089      | -0.010      | 0.024         | 2.938       | -0.070       | 0.002          | 1.513      | -0.036      | 0.111         |
| 111.068 | 3           | 2.229      | 0.017       | 0.006         | 3.341       | 0.112        | 0.000          | 2.261      | 0.081       | 0.010         |
| 111.074 | 136.3       | 2.229      | 0.017       | 0.006         | 3.341       | 0.112        | 0.000          | 2.261      | 0.081       | 0.010         |
| 111.074 | 6           | 1.925      | 0.012       | 0.021         | 2.730       | 0.070        | 0.006          | 1.849      | 0.052       | 0.045         |
| 112.112 | 133.7       | 1.925      | 0.012       | 0.021         | 2.730       | 0.070        | 0.006          | 1.849      | 0.052       | 0.045         |
| 112.112 | 1           | 2.135      | 0.028       | 0.014         | 2.792       | 0.167        | 0.003          | 1.332      | 0.083       | 0.144         |



|         |       |       |        |       |       |        |       |       |        |       |
|---------|-------|-------|--------|-------|-------|--------|-------|-------|--------|-------|
| 112.895 |       |       |        |       |       |        |       |       |        |       |
| 7       | 73    | 2.053 | -0.005 | 0.028 | 0.584 | -0.004 | 0.767 | 2.074 | -0.025 | 0.038 |
| 114.110 |       |       |        |       |       |        |       |       |        |       |
| 7       | 40.7  | 1.146 | -0.010 | 0.166 | 1.387 | -0.055 | 0.135 | 2.674 | -0.112 | 0.002 |
| 114.893 |       |       |        |       |       |        |       |       |        |       |
| 3       | 72.5  | 2.044 | -0.006 | 0.027 | 0.540 | -0.003 | 0.804 | 2.027 | -0.026 | 0.042 |
| 114.980 |       |       |        |       |       |        |       |       |        |       |
| 1       | 182.4 | 1.293 | -0.013 | 0.116 | 1.091 | -0.046 | 0.264 | 2.874 | -0.132 | 0.001 |
| 116.524 |       |       |        |       |       |        |       |       |        |       |
| 2       | 294.1 | 2.286 | -0.013 | 0.006 | 3.039 | -0.076 | 0.001 | 1.784 | -0.047 | 0.046 |
| 119.714 |       |       |        |       |       |        |       |       |        |       |
| 4       | 100   | 1.983 | -0.017 | 0.018 | 1.515 | -0.057 | 0.114 | 2.080 | -0.084 | 0.020 |
| 120.523 |       |       |        |       |       |        |       |       |        |       |
| 1       | 273.6 | 2.281 | -0.009 | 0.018 | 1.529 | -0.028 | 0.120 | 2.417 | -0.045 | 0.013 |
| 120.527 |       |       |        |       |       |        |       |       |        |       |
| 2       | 19.3  | 1.998 | 0.010  | 0.025 | 2.460 | 0.053  | 0.011 | 1.986 | 0.045  | 0.031 |
| 120.527 |       |       |        |       |       |        |       |       |        |       |
| 3       | 266.9 | 1.478 | -0.010 | 0.115 | 2.062 | -0.067 | 0.033 | 1.279 | -0.041 | 0.197 |
| 122.533 |       |       |        |       |       |        |       |       |        |       |
| 8       | 109.7 | 2.064 | 0.012  | 0.015 | 1.683 | 0.041  | 0.103 | 1.313 | 0.031  | 0.221 |
| 122.538 |       |       |        |       |       |        |       |       |        |       |
| 5       | 228.2 | 1.960 | 0.016  | 0.018 | 1.983 | 0.073  | 0.034 | 2.485 | 0.096  | 0.005 |
| 122.924 |       |       |        |       |       |        |       |       |        |       |
| 5       | 71.1  | 2.571 | -0.008 | 0.004 | 1.357 | -0.015 | 0.261 | 2.589 | -0.035 | 0.010 |
| 123.024 |       |       |        |       |       |        |       |       |        |       |
| 7       | 250.3 | 1.911 | -0.019 | 0.019 | 1.902 | -0.081 | 0.041 | 2.127 | -0.097 | 0.015 |
| 125.096 |       |       |        |       |       |        |       |       |        |       |
| 1       | 267.5 | 1.143 | -0.009 | 0.194 | 0.940 | -0.033 | 0.334 | 2.393 | -0.093 | 0.007 |
| 125.529 |       |       |        |       |       |        |       |       |        |       |
| 5       | 294.9 | 1.460 | -0.010 | 0.085 | 2.392 | -0.069 | 0.011 | 1.715 | -0.053 | 0.055 |
| 125.964 |       |       |        |       |       |        |       |       |        |       |
| 2       | 294.8 | 0.678 | -0.004 | 0.577 | 2.424 | -0.092 | 0.012 | 1.151 | -0.043 | 0.248 |
| 126.012 |       |       |        |       |       |        |       |       |        |       |
| 5       | 293   | 1.851 | 0.008  | 0.024 | 2.187 | 0.043  | 0.019 | 1.061 | 0.022  | 0.241 |
| 127.030 |       |       |        |       |       |        |       |       |        |       |
| 1       | 57.6  | 1.643 | 0.012  | 0.051 | 1.186 | 0.036  | 0.218 | 2.018 | 0.067  | 0.023 |
| 127.515 |       |       |        |       |       |        |       |       |        |       |
| 2       | 57.2  | 2.204 | 0.009  | 0.015 | 1.428 | 0.016  | 0.369 | 1.970 | 0.032  | 0.075 |
| 127.982 |       |       |        |       |       |        |       |       |        |       |
| 3       | 292.2 | 1.893 | -0.010 | 0.025 | 2.284 | -0.052 | 0.015 | 2.458 | -0.059 | 0.006 |
| 129.535 |       |       |        |       |       |        |       |       |        |       |
| 7       | 180.2 | 1.344 | 0.012  | 0.112 | 2.137 | 0.088  | 0.022 | 2.011 | 0.087  | 0.025 |
| 130.521 |       |       |        |       |       |        |       |       |        |       |
| 7       | 161.5 | 0.934 | -0.008 | 0.288 | 1.954 | -0.073 | 0.037 | 2.423 | -0.094 | 0.008 |
| 131.034 |       |       |        |       |       |        |       |       |        |       |
| 4       | 133.5 | 1.737 | -0.015 | 0.048 | 2.093 | -0.076 | 0.040 | 0.938 | -0.034 | 0.363 |
| 132.032 |       |       |        |       |       |        |       |       |        |       |
| 1       | 269.8 | 2.175 | -0.009 | 0.011 | 1.540 | -0.029 | 0.097 | 1.935 | -0.037 | 0.032 |
| 133.060 |       |       |        |       |       |        |       |       |        |       |
| 3       | 131.5 | 1.731 | 0.011  | 0.044 | 2.347 | 0.062  | 0.026 | 1.219 | 0.032  | 0.254 |
| 134.058 |       |       |        |       |       |        |       |       |        |       |
| 115.8   | 1.802 | 0.012 | 0.037  | 2.405 | 0.066 | 0.022  | 1.374 | 0.039 | 0.182  |       |
| 134.064 |       |       |        |       |       |        |       |       |        |       |
| 112.7   | 1.576 | 0.010 | 0.077  | 2.137 | 0.054 | 0.055  | 1.138 | 0.028 | 0.324  |       |
| 136.055 |       |       |        |       |       |        |       |       |        |       |
| 5       | 192.3 | 1.318 | 0.013  | 0.111 | 2.113 | 0.092  | 0.025 | 1.003 | 0.048  | 0.256 |
| 137.037 |       |       |        |       |       |        |       |       |        |       |
| 5       | 293.8 | 1.452 | -0.012 | 0.085 | 2.104 | -0.080 | 0.023 | 0.341 | -0.011 | 0.767 |
| 141.485 |       |       |        |       |       |        |       |       |        |       |
| 1       | 183.8 | 2.342 | 0.019  | 0.005 | 2.283 | 0.083  | 0.015 | 1.565 | 0.060  | 0.082 |
| 142.069 |       |       |        |       |       |        |       |       |        |       |
| 3       | 94.9  | 2.102 | 0.019  | 0.011 | 0.756 | 0.029  | 0.431 | 1.632 | 0.067  | 0.064 |
| 142.530 |       |       |        |       |       |        |       |       |        |       |
| 5       | 250.7 | 1.548 | -0.012 | 0.061 | 2.141 | -0.067 | 0.027 | 0.897 | -0.031 | 0.314 |
| 142.966 |       |       |        |       |       |        |       |       |        |       |
| 9       | 296.3 | 0.938 | -0.009 | 0.267 | 0.673 | -0.027 | 0.498 | 2.059 | -0.093 | 0.021 |
| 145.043 |       |       |        |       |       |        |       |       |        |       |
| 8       | 286.1 | 0.616 | -0.003 | 0.557 | 2.084 | -0.048 | 0.031 | 0.615 | -0.014 | 0.545 |

|         |       |       |        |       |       |        |       |       |        |       |  |
|---------|-------|-------|--------|-------|-------|--------|-------|-------|--------|-------|--|
| 146.518 |       |       |        |       |       |        |       |       |        |       |  |
| 6       | 190.6 | 1.166 | 0.006  | 0.169 | 2.120 | 0.050  | 0.027 | 1.304 | 0.034  | 0.142 |  |
| 147.528 |       |       |        |       |       |        |       |       |        |       |  |
| 4       | 150.3 | 2.160 | -0.013 | 0.011 | 2.067 | -0.053 | 0.034 | 1.497 | -0.042 | 0.096 |  |
| 149.023 |       |       |        |       |       |        |       |       |        |       |  |
| 4       | 289.1 | 0.714 | 0.006  | 0.404 | 2.164 | 0.084  | 0.020 | 0.743 | 0.030  | 0.410 |  |
| 150.058 |       |       |        |       |       |        |       |       |        |       |  |
| 4       | 73.4  | 1.220 | 0.009  | 0.272 | 2.434 | 0.090  | 0.018 | 1.302 | 0.045  | 0.249 |  |
| 150.414 | 60    | 1.306 | -0.014 | 0.118 | 2.319 | -0.108 | 0.012 | 1.699 | -0.083 | 0.054 |  |
| 151.061 |       |       |        |       |       |        |       |       |        |       |  |
| 7       | 74.4  | 1.127 | 0.008  | 0.326 | 2.124 | 0.081  | 0.046 | 1.305 | 0.049  | 0.231 |  |
| 152.054 |       |       |        |       |       |        |       |       |        |       |  |
| 2       | 74.9  | 1.597 | 0.016  | 0.064 | 2.825 | 0.121  | 0.003 | 1.635 | 0.072  | 0.087 |  |
| 154.122 |       |       |        |       |       |        |       |       |        |       |  |
| 7       | 24.8  | 0.648 | 0.005  | 0.444 | 2.059 | 0.073  | 0.027 | 0.683 | 0.026  | 0.443 |  |
| 155.042 |       |       |        |       |       |        |       |       |        |       |  |
| 7       | 114.9 | 1.987 | 0.011  | 0.018 | 2.031 | 0.045  | 0.048 | 1.580 | 0.038  | 0.099 |  |
| 155.143 |       |       |        |       |       |        |       |       |        |       |  |
| 1       | 135.2 | 0.328 | -0.003 | 0.761 | 2.413 | -0.108 | 0.009 | 0.263 | 0.000  | 0.994 |  |
| 157.085 |       |       |        |       |       |        |       |       |        |       |  |
| 9       | 20.8  | 2.698 | -0.026 | 0.001 | 1.573 | -0.068 | 0.096 | 3.344 | -0.152 | 0.000 |  |
| 158.077 |       |       |        |       |       |        |       |       |        |       |  |
| 1       | 134.5 | 2.299 | 0.015  | 0.005 | 2.996 | 0.082  | 0.002 | 2.105 | 0.063  | 0.019 |  |
| 158.082 | 140.5 | 2.400 | 0.020  | 0.003 | 2.302 | 0.077  | 0.019 | 2.224 | 0.083  | 0.011 |  |
| 158.843 |       |       |        |       |       |        |       |       |        |       |  |
| 2       | 68.3  | 2.772 | -0.025 | 0.002 | 2.879 | -0.116 | 0.004 | 2.464 | -0.107 | 0.008 |  |
| 158.912 |       |       |        |       |       |        |       |       |        |       |  |
| 4       | 28.4  | 1.197 | 0.008  | 0.181 | 0.518 | -0.001 | 0.962 | 2.656 | 0.088  | 0.002 |  |
| 159.084 |       |       |        |       |       |        |       |       |        |       |  |
| 5       | 139.3 | 1.331 | 0.014  | 0.109 | 1.505 | 0.066  | 0.110 | 2.092 | 0.099  | 0.017 |  |
| 159.112 |       |       |        |       |       |        |       |       |        |       |  |
| 8       | 249.6 | 1.435 | 0.012  | 0.089 | 0.874 | 0.030  | 0.390 | 2.051 | 0.080  | 0.022 |  |
| 161.038 |       |       |        |       |       |        |       |       |        |       |  |
| 6       | 89.1  | 1.713 | 0.016  | 0.037 | 0.786 | 0.027  | 0.475 | 2.233 | 0.096  | 0.011 |  |
| 161.100 |       |       |        |       |       |        |       |       |        |       |  |
| 2       | 88.9  | 1.415 | -0.013 | 0.125 | 0.294 | -0.008 | 0.848 | 2.419 | -0.110 | 0.009 |  |
| 161.128 |       |       |        |       |       |        |       |       |        |       |  |
| 4       | 114.9 | 2.228 | 0.020  | 0.006 | 1.545 | 0.058  | 0.105 | 1.515 | 0.061  | 0.088 |  |
| 162.992 |       |       |        |       |       |        |       |       |        |       |  |
| 6       | 200.6 | 2.308 | -0.016 | 0.005 | 2.910 | -0.086 | 0.002 | 2.297 | -0.073 | 0.009 |  |
| 165.982 |       |       |        |       |       |        |       |       |        |       |  |
| 9       | 158.3 | 0.668 | -0.006 | 0.448 | 2.306 | -0.096 | 0.012 | 0.658 | -0.028 | 0.471 |  |
| 166.064 |       |       |        |       |       |        |       |       |        |       |  |
| 5       | 261.2 | 2.036 | -0.009 | 0.017 | 2.053 | -0.039 | 0.033 | 1.720 | -0.034 | 0.058 |  |
| 167.056 |       |       |        |       |       |        |       |       |        |       |  |
| 6       | 116.3 | 1.122 | 0.010  | 0.180 | 2.167 | 0.085  | 0.019 | 1.050 | 0.043  | 0.235 |  |
| 167.106 |       |       |        |       |       |        |       |       |        |       |  |
| 7       | 274.6 | 1.530 | -0.013 | 0.092 | 1.725 | -0.071 | 0.069 | 2.384 | -0.100 | 0.010 |  |
| 168.049 | 113.5 | 1.179 | 0.010  | 0.149 | 2.167 | 0.082  | 0.020 | 1.315 | 0.053  | 0.139 |  |
| 168.09  | 70.4  | 2.027 | 0.014  | 0.014 | 3.306 | 0.098  | 0.000 | 1.569 | 0.047  | 0.092 |  |
| 169.045 |       |       |        |       |       |        |       |       |        |       |  |
| 9       | 260.8 | 1.282 | -0.007 | 0.141 | 2.072 | -0.052 | 0.027 | 1.585 | -0.042 | 0.079 |  |
| 170.495 |       |       |        |       |       |        |       |       |        |       |  |
| 6       | 255.3 | 2.310 | 0.021  | 0.006 | 1.055 | 0.040  | 0.281 | 1.868 | 0.077  | 0.038 |  |
| 170.854 |       |       |        |       |       |        |       |       |        |       |  |
| 2       | 73.7  | 2.518 | -0.008 | 0.003 | 1.247 | -0.018 | 0.210 | 2.572 | -0.040 | 0.005 |  |
| 172.009 | 197.5 | 1.864 | -0.019 | 0.024 | 2.341 | -0.101 | 0.012 | 1.422 | -0.066 | 0.110 |  |
| 172.995 |       |       |        |       |       |        |       |       |        |       |  |
| 7       | 295   | 1.990 | -0.017 | 0.045 | 1.706 | -0.061 | 0.139 | 2.197 | -0.094 | 0.023 |  |
| 173.128 |       |       |        |       |       |        |       |       |        |       |  |
| 5       | 67.9  | 2.463 | 0.020  | 0.004 | 2.635 | 0.089  | 0.008 | 1.977 | 0.066  | 0.053 |  |
| 173.153 |       |       |        |       |       |        |       |       |        |       |  |
| 7       | 21.5  | 2.178 | 0.021  | 0.008 | 2.215 | 0.095  | 0.016 | 1.800 | 0.082  | 0.041 |  |
| 174.131 |       |       |        |       |       |        |       |       |        |       |  |
| 1       | 19.2  | 1.379 | -0.005 | 0.190 | 2.695 | -0.054 | 0.005 | 0.458 | 0.006  | 0.753 |  |
| 174.144 | 116.8 | 1.786 | -0.017 | 0.028 | 1.080 | -0.041 | 0.268 | 2.227 | -0.095 | 0.011 |  |

|         |       |        |        |       |        |        |       |        |        |       |
|---------|-------|--------|--------|-------|--------|--------|-------|--------|--------|-------|
| 174.500 |       |        |        |       |        |        |       |        |        |       |
| 6       | 207   | 2.493  | -0.023 | 0.003 | 2.805  | -0.112 | 0.003 | 1.512  | -0.064 | 0.093 |
| 174.938 |       |        |        |       |        |        |       |        |        |       |
| 1       | 73.2  | 1.747  | -0.006 | 0.083 | 1.067  | -0.015 | 0.353 | 2.110  | -0.033 | 0.039 |
| 174.994 |       |        |        |       |        |        |       |        |        |       |
| 6       | 273.1 | 0.986  | -0.007 | 0.294 | 2.006  | -0.067 | 0.033 | 0.519  | -0.016 | 0.626 |
| 175.034 |       |        |        |       |        |        |       |        |        |       |
| 1       | 56.5  | 1.439  | -0.012 | 0.103 | 1.061  | -0.038 | 0.278 | 2.581  | -0.100 | 0.004 |
| 175.057 |       |        |        |       |        |        |       |        |        |       |
| 9       | 77.4  | 2.146  | 0.017  | 0.016 | 1.452  | 0.051  | 0.135 | 2.308  | 0.083  | 0.015 |
| 175.144 |       |        |        |       |        |        |       |        |        |       |
| 132.9   | 2.114 | 0.018  | 0.009  | 1.489 | 0.050  | 0.137  | 1.216 | 0.044  | 0.188  |       |
| 176.515 |       |        |        |       |        |        |       |        |        |       |
| 7       | 212.7 | 2.919  | -0.031 | 0.001 | 2.985  | -0.143 | 0.002 | 1.678  | -0.085 | 0.064 |
| 177.112 |       |        |        |       |        |        |       |        |        |       |
| 2       | 22.4  | 1.091  | 0.011  | 0.237 | 2.064  | 0.099  | 0.032 | 0.924  | 0.044  | 0.349 |
| 177.127 |       |        |        |       |        |        |       |        |        |       |
| 9       | 263.6 | 2.539  | -0.019 | 0.002 | 1.842  | -0.060 | 0.046 | 1.646  | -0.057 | 0.064 |
| 178.050 |       |        |        |       |        |        |       |        |        |       |
| 7       | 172.1 | 2.830  | 0.012  | 0.001 | 1.663  | 0.028  | 0.121 | 2.846  | 0.057  | 0.001 |
| 178.058 |       |        |        |       |        |        |       |        |        |       |
| 7       | 139.3 | 1.530  | 0.007  | 0.065 | 2.163  | 0.041  | 0.019 | 1.001  | 0.019  | 0.287 |
| 179.106 |       |        |        |       |        |        |       |        |        |       |
| 7       | 266.2 | 2.888  | -0.030 | 0.001 | 4.001  | -0.181 | 0.000 | 2.202  | -0.106 | 0.013 |
| 180.950 |       |        |        |       |        |        |       |        |        |       |
| 6       | 267.9 | 1.317  | 0.008  | 0.110 | 0.796  | 0.020  | 0.390 | 2.987  | 0.079  | 0.001 |
| 182.568 |       |        |        |       |        |        |       |        |        |       |
| 7       | 158.6 | 2.335  | -0.017 | 0.004 | 1.699  | -0.055 | 0.066 | 2.124  | -0.072 | 0.015 |
| 183.110 |       |        |        |       |        |        |       |        |        |       |
| 6       | 121.7 | 2.146  | 0.021  | 0.009 | 0.834  | 0.037  | 0.368 | 1.670  | 0.078  | 0.058 |
| 183.578 |       |        |        |       |        |        |       |        |        |       |
| 1       | 287.7 | 2.088  | 0.019  | 0.015 | 1.557  | 0.060  | 0.112 | 1.441  | 0.061  | 0.110 |
| 184.945 |       |        |        |       |        |        |       |        |        |       |
| 9       | 139.6 | 2.194  | 0.015  | 0.009 | 2.346  | 0.072  | 0.011 | 2.420  | 0.078  | 0.006 |
| 184.989 |       |        |        |       |        |        |       |        |        |       |
| 4       | 180.1 | 2.961  | -0.020 | 0.000 | 2.132  | -0.063 | 0.021 | 1.852  | -0.057 | 0.039 |
| 185.398 |       |        |        |       |        |        |       |        |        |       |
| 135.2   | 1.603 | -0.012 | 0.076  | 1.882 | -0.062 | 0.068  | 2.027 | -0.075 | 0.029  |       |
| 186.076 |       |        |        |       |        |        |       |        |        |       |
| 1       | 257.1 | 1.269  | 0.012  | 0.126 | 2.239  | 0.091  | 0.016 | 0.430  | 0.018  | 0.637 |
| 186.933 |       |        |        |       |        |        |       |        |        |       |
| 5       | 138.6 | 2.455  | -0.020 | 0.003 | 1.709  | -0.063 | 0.065 | 1.631  | -0.064 | 0.064 |
| 186.943 |       |        |        |       |        |        |       |        |        |       |
| 2       | 135.9 | 1.946  | -0.015 | 0.021 | 2.255  | -0.077 | 0.017 | 2.069  | -0.075 | 0.021 |
| 187.133 |       |        |        |       |        |        |       |        |        |       |
| 20.7    | 2.440 | 0.020  | 0.003  | 2.578 | 0.093  | 0.005  | 2.477 | 0.094  | 0.005  |       |
| 187.990 |       |        |        |       |        |        |       |        |        |       |
| 6       | 101.4 | 1.400  | -0.005 | 0.142 | 2.282  | -0.041 | 0.016 | 1.175  | -0.019 | 0.263 |
| 189.097 |       |        |        |       |        |        |       |        |        |       |
| 2       | 24.7  | 0.972  | 0.009  | 0.234 | 2.050  | 0.084  | 0.026 | 0.490  | 0.019  | 0.618 |
| 189.558 |       |        |        |       |        |        |       |        |        |       |
| 7       | 173.8 | 1.972  | 0.008  | 0.025 | 1.894  | 0.032  | 0.066 | 2.264  | 0.043  | 0.016 |
| 190.016 |       |        |        |       |        |        |       |        |        |       |
| 2       | 180.9 | 1.673  | -0.014 | 0.082 | 2.376  | -0.096 | 0.017 | 0.476  | -0.017 | 0.680 |
| 190.504 |       |        |        |       |        |        |       |        |        |       |
| 3       | 287.7 | 1.774  | -0.014 | 0.044 | 1.544  | -0.057 | 0.095 | 2.016  | -0.077 | 0.026 |
| 190.901 |       |        |        |       |        |        |       |        |        |       |
| 8       | 26.7  | 2.070  | -0.018 | 0.017 | 2.447  | -0.089 | 0.014 | 1.920  | -0.078 | 0.033 |
| 192.043 |       |        |        |       |        |        |       |        |        |       |
| 7       | 106.9 | 1.825  | -0.007 | 0.035 | 2.233  | -0.039 | 0.016 | 1.939  | -0.035 | 0.032 |
| 192.159 |       |        |        |       |        |        |       |        |        |       |
| 5       | 56.4  | 2.129  | -0.025 | 0.009 | 0.918  | -0.027 | 0.561 | 1.069  | -0.039 | 0.408 |
| 194.022 |       |        |        |       |        |        |       |        |        |       |
| 3       | 74.2  | 1.230  | 0.009  | 0.247 | 2.118  | 0.078  | 0.039 | 1.586  | 0.061  | 0.111 |
| 196.988 |       |        |        |       |        |        |       |        |        |       |
| 4       | 22.7  | 0.833  | 0.008  | 0.318 | 0.475  | 0.019  | 0.628 | 2.285  | 0.099  | 0.010 |
| 197.128 |       |        |        |       |        |        |       |        |        |       |
| 5       | 254.7 | 1.223  | -0.010 | 0.159 | 2.428  | -0.086 | 0.009 | 0.118  | -0.004 | 0.908 |
| 200.952 |       |        |        |       |        |        |       |        |        |       |
| 2       | 38.3  | 1.256  | 0.006  | 0.165 | 2.186  | 0.047  | 0.019 | 0.486  | 0.010  | 0.624 |

|         |       |       |        |       |       |        |       |       |        |       |  |
|---------|-------|-------|--------|-------|-------|--------|-------|-------|--------|-------|--|
| 201.072 |       |       |        |       |       |        |       |       |        |       |  |
| 2       | 79.4  | 1.798 | -0.018 | 0.028 | 2.462 | -0.106 | 0.008 | 1.903 | -0.087 | 0.030 |  |
| 204.029 |       |       |        |       |       |        |       |       |        |       |  |
| 1       | 19.5  | 0.381 | -0.001 | 0.876 | 2.041 | -0.059 | 0.041 | 0.752 | -0.017 | 0.551 |  |
| 205.042 |       |       |        |       |       |        |       |       |        |       |  |
| 5       | 68.4  | 1.508 | 0.012  | 0.104 | 2.163 | 0.081  | 0.020 | 1.093 | 0.030  | 0.404 |  |
| 209.036 |       |       |        |       |       |        |       |       |        |       |  |
| 4       | 198.3 | 1.986 | -0.023 | 0.026 | 3.253 | -0.173 | 0.001 | 2.592 | -0.143 | 0.005 |  |
| 210.015 |       |       |        |       |       |        |       |       |        |       |  |
| 1       | 146.8 | 2.179 | -0.016 | 0.009 | 1.191 | -0.037 | 0.204 | 1.585 | -0.052 | 0.078 |  |
| 210.078 |       |       |        |       |       |        |       |       |        |       |  |
| 3       | 82.8  | 2.341 | 0.026  | 0.004 | 2.267 | 0.110  | 0.015 | 2.445 | 0.127  | 0.005 |  |
| 212.128 |       |       |        |       |       |        |       |       |        |       |  |
| 23.3    | 23.3  | 2.210 | 0.007  | 0.009 | 1.090 | 0.016  | 0.255 | 2.872 | 0.044  | 0.001 |  |
| 212.979 |       |       |        |       |       |        |       |       |        |       |  |
| 2       | 239   | 1.300 | -0.008 | 0.146 | 2.387 | -0.069 | 0.011 | 0.917 | -0.027 | 0.320 |  |
| 213.159 |       |       |        |       |       |        |       |       |        |       |  |
| 7       | 275.8 | 1.524 | 0.016  | 0.078 | 2.090 | 0.101  | 0.025 | 1.894 | 0.096  | 0.035 |  |
| 213.184 |       |       |        |       |       |        |       |       |        |       |  |
| 9       | 20.2  | 2.104 | 0.018  | 0.010 | 1.613 | 0.057  | 0.091 | 1.955 | 0.074  | 0.028 |  |
| 214.003 |       |       |        |       |       |        |       |       |        |       |  |
| 9       | 291.9 | 1.157 | 0.008  | 0.165 | 2.033 | 0.057  | 0.031 | 1.347 | 0.041  | 0.127 |  |
| 214.120 |       |       |        |       |       |        |       |       |        |       |  |
| 3       | 34.4  | 2.015 | 0.020  | 0.019 | 1.941 | 0.085  | 0.039 | 2.042 | 0.094  | 0.024 |  |
| 215.023 |       |       |        |       |       |        |       |       |        |       |  |
| 4       | 252.1 | 2.200 | -0.017 | 0.010 | 1.935 | -0.065 | 0.042 | 2.240 | -0.081 | 0.012 |  |
| 217.075 |       |       |        |       |       |        |       |       |        |       |  |
| 3       | 221.2 | 2.329 | -0.020 | 0.008 | 2.015 | -0.080 | 0.031 | 1.665 | -0.069 | 0.065 |  |
| 217.154 |       |       |        |       |       |        |       |       |        |       |  |
| 6       | 89.6  | 2.702 | 0.022  | 0.002 | 1.586 | 0.057  | 0.110 | 1.761 | 0.068  | 0.056 |  |
| 217.179 |       |       |        |       |       |        |       |       |        |       |  |
| 8       | 20.1  | 2.109 | 0.022  | 0.011 | 1.276 | 0.057  | 0.167 | 0.605 | 0.028  | 0.498 |  |
| 217.485 |       |       |        |       |       |        |       |       |        |       |  |
| 4       | 111.9 | 1.594 | 0.011  | 0.050 | 1.491 | 0.040  | 0.132 | 2.381 | 0.072  | 0.007 |  |
| 221.024 |       |       |        |       |       |        |       |       |        |       |  |
| 6       | 85.7  | 1.324 | 0.011  | 0.114 | 2.380 | 0.087  | 0.010 | 0.489 | 0.018  | 0.600 |  |
| 223.096 |       |       |        |       |       |        |       |       |        |       |  |
| 4       | 278.5 | 2.037 | 0.019  | 0.018 | 2.091 | 0.086  | 0.029 | 1.033 | 0.046  | 0.251 |  |
| 224.185 |       |       |        |       |       |        |       |       |        |       |  |
| 5       | 25.4  | 0.909 | -0.011 | 0.271 | 2.048 | -0.113 | 0.026 | 0.269 | 0.001  | 0.989 |  |
| 226.105 |       |       |        |       |       |        |       |       |        |       |  |
| 2       | 67.7  | 0.932 | -0.008 | 0.274 | 2.238 | -0.090 | 0.015 | 1.170 | -0.049 | 0.189 |  |
| 227.113 |       |       |        |       |       |        |       |       |        |       |  |
| 6       | 110.4 | 1.288 | 0.012  | 0.121 | 2.375 | 0.095  | 0.012 | 0.853 | 0.034  | 0.374 |  |
| 227.634 |       |       |        |       |       |        |       |       |        |       |  |
| 3       | 41.3  | 1.587 | 0.014  | 0.055 | 2.081 | 0.080  | 0.024 | 1.202 | 0.048  | 0.182 |  |
| 228.117 |       |       |        |       |       |        |       |       |        |       |  |
| 110.1   | 110.1 | 1.141 | -0.012 | 0.171 | 2.064 | -0.093 | 0.025 | 1.096 | -0.052 | 0.217 |  |
| 228.812 |       |       |        |       |       |        |       |       |        |       |  |
| 5       | 73.9  | 1.766 | -0.007 | 0.048 | 0.699 | -0.011 | 0.516 | 2.294 | -0.041 | 0.012 |  |
| 229.944 |       |       |        |       |       |        |       |       |        |       |  |
| 8       | 292.5 | 0.832 | -0.002 | 0.378 | 0.780 | -0.011 | 0.400 | 2.253 | -0.032 | 0.013 |  |
| 230.003 |       |       |        |       |       |        |       |       |        |       |  |
| 1       | 131.6 | 1.905 | 0.011  | 0.022 | 2.051 | 0.051  | 0.026 | 1.888 | 0.049  | 0.036 |  |
| 230.121 |       |       |        |       |       |        |       |       |        |       |  |
| 5       | 103.7 | 1.314 | -0.011 | 0.127 | 2.517 | -0.096 | 0.008 | 1.751 | -0.070 | 0.055 |  |
| 231.032 |       |       |        |       |       |        |       |       |        |       |  |
| 1       | 101.4 | 1.733 | 0.015  | 0.040 | 0.517 | -0.001 | 0.981 | 2.080 | 0.083  | 0.019 |  |
| 233.899 |       |       |        |       |       |        |       |       |        |       |  |
| 9       | 76.8  | 2.083 | -0.022 | 0.011 | 1.583 | -0.072 | 0.087 | 1.389 | -0.067 | 0.116 |  |
| 235.205 |       |       |        |       |       |        |       |       |        |       |  |
| 5       | 264.6 | 2.212 | -0.020 | 0.013 | 1.784 | -0.073 | 0.070 | 2.183 | -0.097 | 0.016 |  |
| 238.923 |       |       |        |       |       |        |       |       |        |       |  |
| 3       | 146   | 2.062 | -0.021 | 0.012 | 1.614 | -0.073 | 0.082 | 2.092 | -0.101 | 0.017 |  |
| 239.200 |       |       |        |       |       |        |       |       |        |       |  |
| 4       | 20.8  | 2.489 | 0.022  | 0.003 | 0.895 | 0.034  | 0.349 | 2.112 | 0.088  | 0.017 |  |
| 240.105 |       |       |        |       |       |        |       |       |        |       |  |
| 8       | 44.4  | 0.940 | -0.008 | 0.283 | 2.032 | -0.077 | 0.027 | 0.287 | -0.002 | 0.966 |  |

|         |       |       |        |       |       |        |       |       |        |       |  |
|---------|-------|-------|--------|-------|-------|--------|-------|-------|--------|-------|--|
| 240.122 |       |       |        |       |       |        |       |       |        |       |  |
| 6       | 30.1  | 0.750 | -0.007 | 0.359 | 2.012 | -0.083 | 0.035 | 0.135 | 0.003  | 0.941 |  |
| 241.999 |       |       |        |       |       |        |       |       |        |       |  |
| 6       | 178.9 | 3.096 | -0.032 | 0.000 | 3.459 | -0.163 | 0.000 | 2.292 | -0.113 | 0.011 |  |
| 246.085 | 137.8 | 1.863 | 0.013  | 0.022 | 2.003 | 0.062  | 0.031 | 1.798 | 0.059  | 0.042 |  |
| 248.058 |       |       |        |       |       |        |       |       |        |       |  |
| 5       | 60.3  | 1.128 | 0.010  | 0.222 | 1.390 | 0.057  | 0.138 | 2.085 | 0.087  | 0.024 |  |
| 250.237 |       |       |        |       |       |        |       |       |        |       |  |
| 2       | 25    | 1.480 | -0.016 | 0.077 | 0.170 | -0.001 | 0.973 | 2.086 | -0.104 | 0.018 |  |
| 251.046 |       |       |        |       |       |        |       |       |        |       |  |
| 6       | 22.5  | 1.707 | -0.012 | 0.047 | 2.096 | -0.064 | 0.031 | 2.210 | -0.073 | 0.015 |  |
| 251.932 |       |       |        |       |       |        |       |       |        |       |  |
| 8       | 91.1  | 1.425 | -0.013 | 0.127 | 2.239 | -0.096 | 0.019 | 1.888 | -0.083 | 0.044 |  |
| 252.131 | 44    | 1.963 | 0.017  | 0.019 | 2.137 | 0.079  | 0.025 | 1.907 | 0.077  | 0.030 |  |
| 252.143 |       |       |        |       |       |        |       |       |        |       |  |
| 9       | 22.6  | 2.100 | 0.018  | 0.016 | 1.496 | 0.054  | 0.140 | 1.707 | 0.069  | 0.060 |  |
| 254.644 |       |       |        |       |       |        |       |       |        |       |  |
| 9       | 41.7  | 2.308 | -0.023 | 0.007 | 1.715 | -0.074 | 0.081 | 1.373 | -0.066 | 0.123 |  |
| 254.819 |       |       |        |       |       |        |       |       |        |       |  |
| 4       | 75.9  | 2.125 | -0.012 | 0.009 | 1.257 | -0.031 | 0.175 | 1.818 | -0.048 | 0.039 |  |
| 254.999 |       |       |        |       |       |        |       |       |        |       |  |
| 3       | 97.3  | 1.022 | -0.009 | 0.252 | 1.222 | -0.046 | 0.219 | 2.015 | -0.083 | 0.027 |  |
| 255.044 |       |       |        |       |       |        |       |       |        |       |  |
| 9       | 70.2  | 1.057 | -0.007 | 0.210 | 2.266 | -0.066 | 0.014 | 0.238 | -0.006 | 0.820 |  |
| 255.977 |       |       |        |       |       |        |       |       |        |       |  |
| 8       | 100.3 | 1.097 | -0.003 | 0.339 | 2.073 | -0.037 | 0.037 | 1.094 | -0.016 | 0.366 |  |
| 256.147 | 44    | 1.559 | 0.016  | 0.080 | 1.750 | 0.081  | 0.067 | 2.423 | 0.118  | 0.008 |  |
| 256.234 |       |       |        |       |       |        |       |       |        |       |  |
| 9       | 260.2 | 0.945 | -0.008 | 0.250 | 0.800 | -0.028 | 0.397 | 2.154 | -0.080 | 0.015 |  |
| 256.642 |       |       |        |       |       |        |       |       |        |       |  |
| 7       | 42.4  | 0.930 | 0.008  | 0.284 | 2.822 | 0.110  | 0.003 | 1.214 | 0.052  | 0.173 |  |
| 258.980 |       |       |        |       |       |        |       |       |        |       |  |
| 7       | 140.1 | 1.262 | 0.011  | 0.151 | 1.029 | 0.041  | 0.290 | 2.157 | 0.093  | 0.016 |  |
| 259.107 | 161.9 | 2.006 | -0.019 | 0.014 | 1.531 | -0.065 | 0.097 | 1.788 | -0.080 | 0.042 |  |
| 260.113 |       |       |        |       |       |        |       |       |        |       |  |
| 6       | 162.2 | 2.411 | 0.018  | 0.003 | 1.678 | 0.045  | 0.131 | 2.556 | 0.086  | 0.004 |  |
| 260.185 |       |       |        |       |       |        |       |       |        |       |  |
| 3       | 54    | 1.847 | -0.015 | 0.034 | 2.069 | -0.079 | 0.027 | 2.557 | -0.102 | 0.004 |  |
| 262.122 | 103.8 | 1.201 | -0.014 | 0.144 | 2.024 | -0.104 | 0.030 | 0.665 | -0.034 | 0.481 |  |
| 262.128 |       |       |        |       |       |        |       |       |        |       |  |
| 1       | 24    | 1.400 | -0.014 | 0.110 | 0.313 | 0.013  | 0.748 | 2.165 | -0.100 | 0.016 |  |
| 269.993 |       |       |        |       |       |        |       |       |        |       |  |
| 5       | 97.9  | 2.010 | 0.013  | 0.018 | 1.873 | 0.048  | 0.085 | 2.477 | 0.078  | 0.005 |  |
| 270.069 |       |       |        |       |       |        |       |       |        |       |  |
| 2       | 116.3 | 1.717 | 0.018  | 0.046 | 2.169 | 0.101  | 0.021 | 1.517 | 0.075  | 0.091 |  |
| 270.154 |       |       |        |       |       |        |       |       |        |       |  |
| 3       | 30.8  | 0.508 | 0.005  | 0.570 | 2.220 | 0.096  | 0.018 | 0.894 | 0.041  | 0.320 |  |
| 273.166 |       |       |        |       |       |        |       |       |        |       |  |
| 9       | 267.4 | 2.190 | 0.012  | 0.007 | 2.347 | 0.058  | 0.011 | 1.539 | 0.040  | 0.081 |  |
| 275.058 |       |       |        |       |       |        |       |       |        |       |  |
| 6       | 102   | 1.554 | 0.014  | 0.063 | 2.260 | 0.089  | 0.018 | 1.611 | 0.066  | 0.079 |  |
| 277.102 |       |       |        |       |       |        |       |       |        |       |  |
| 8       | 103.5 | 0.565 | -0.004 | 0.540 | 2.290 | -0.083 | 0.014 | 0.143 | -0.002 | 0.943 |  |
| 279.216 |       |       |        |       |       |        |       |       |        |       |  |
| 2       | 47.3  | 1.822 | 0.017  | 0.032 | 0.171 | 0.004  | 0.918 | 2.056 | 0.091  | 0.022 |  |
| 281.008 |       |       |        |       |       |        |       |       |        |       |  |
| 1       | 54.8  | 2.069 | -0.015 | 0.013 | 1.576 | -0.048 | 0.099 | 2.058 | -0.067 | 0.023 |  |
| 283.174 |       |       |        |       |       |        |       |       |        |       |  |
| 7       | 265.8 | 0.740 | 0.005  | 0.371 | 2.041 | 0.060  | 0.030 | 0.806 | 0.026  | 0.365 |  |
| 284.134 |       |       |        |       |       |        |       |       |        |       |  |
| 7       | 145.1 | 1.140 | -0.011 | 0.171 | 1.486 | -0.060 | 0.117 | 2.388 | -0.105 | 0.006 |  |
| 284.206 |       |       |        |       |       |        |       |       |        |       |  |
| 5       | 41.4  | 1.255 | -0.010 | 0.200 | 2.520 | -0.100 | 0.006 | 1.342 | -0.053 | 0.159 |  |
| 284.960 |       |       |        |       |       |        |       |       |        |       |  |
| 8       | 262.3 | 1.597 | -0.013 | 0.071 | 0.608 | -0.022 | 0.520 | 2.368 | -0.092 | 0.008 |  |
| 285.966 |       |       |        |       |       |        |       |       |        |       |  |
| 3       | 90.6  | 2.054 | -0.016 | 0.014 | 1.172 | -0.040 | 0.212 | 1.342 | -0.049 | 0.132 |  |

|         |       |        |        |       |        |        |       |       |        |       |
|---------|-------|--------|--------|-------|--------|--------|-------|-------|--------|-------|
| 287.069 |       |        |        |       |        |        |       |       |        |       |
| 4       | 100   | 1.600  | 0.019  | 0.052 | 1.534  | 0.077  | 0.102 | 2.294 | 0.124  | 0.009 |
| 288.166 |       |        |        |       |        |        |       |       |        |       |
| 1       | 140.3 | 1.143  | 0.007  | 0.223 | 2.004  | 0.053  | 0.059 | 1.231 | 0.035  | 0.224 |
| 288.954 |       |        |        |       |        |        |       |       |        |       |
| 9       | 18.4  | 2.065  | 0.018  | 0.014 | 0.750  | 0.023  | 0.526 | 2.001 | 0.082  | 0.024 |
| 290.145 |       |        |        |       |        |        |       |       |        |       |
| 3       | 140.6 | 1.836  | -0.017 | 0.027 | 1.525  | -0.064 | 0.099 | 2.211 | -0.097 | 0.013 |
| 291.101 |       |        |        |       |        |        |       |       |        |       |
| 30.7    | 2.470 | 0.021  | 0.004  | 0.683 | 0.025  | 0.476  | 2.123 | 0.085 | 0.018  |       |
| 293.033 |       |        |        |       |        |        |       |       |        |       |
| 7       | 86.2  | 1.635  | 0.006  | 0.131 | 2.690  | 0.053  | 0.004 | 1.053 | 0.018  | 0.344 |
| 293.217 |       |        |        |       |        |        |       |       |        |       |
| 8       | 130.9 | 1.525  | 0.010  | 0.118 | 2.001  | 0.048  | 0.126 | 1.325 | 0.036  | 0.254 |
| 297.242 |       |        |        |       |        |        |       |       |        |       |
| 279.9   | 1.475 | -0.010 | 0.116  | 2.176 | -0.070 | 0.026  | 0.220 | 0.002 | 0.962  |       |
| 298.222 |       |        |        |       |        |        |       |       |        |       |
| 1       | 41.9  | 1.256  | -0.008 | 0.191 | 2.372  | -0.077 | 0.010 | 1.428 | -0.046 | 0.133 |
| 300.179 |       |        |        |       |        |        |       |       |        |       |
| 6       | 24.3  | 2.191  | 0.023  | 0.011 | 2.232  | 0.106  | 0.017 | 2.305 | 0.114  | 0.011 |
| 300.684 |       |        |        |       |        |        |       |       |        |       |
| 151.2   | 1.672 | 0.016  | 0.062  | 2.329 | 0.104  | 0.013  | 2.123 | 0.097 | 0.022  |       |
| 302.019 |       |        |        |       |        |        |       |       |        |       |
| 1       | 35.4  | 1.562  | 0.013  | 0.056 | 2.067  | 0.073  | 0.025 | 2.180 | 0.081  | 0.014 |
| 302.159 |       |        |        |       |        |        |       |       |        |       |
| 3       | 25.7  | 2.317  | -0.021 | 0.007 | 1.335  | -0.054 | 0.162 | 1.397 | -0.060 | 0.123 |
| 302.180 |       |        |        |       |        |        |       |       |        |       |
| 7       | 136.8 | 1.073  | 0.008  | 0.192 | 2.102  | 0.064  | 0.029 | 1.180 | 0.039  | 0.182 |
| 302.304 |       |        |        |       |        |        |       |       |        |       |
| 9       | 46.1  | 1.849  | -0.018 | 0.024 | 1.075  | -0.044 | 0.255 | 2.795 | -0.122 | 0.001 |
| 303.184 |       |        |        |       |        |        |       |       |        |       |
| 8       | 135.5 | 1.234  | 0.009  | 0.188 | 2.081  | 0.059  | 0.075 | 1.064 | 0.035  | 0.299 |
| 304.211 |       |        |        |       |        |        |       |       |        |       |
| 4       | 56.1  | 2.348  | -0.027 | 0.005 | 3.008  | -0.155 | 0.001 | 2.103 | -0.114 | 0.017 |
| 304.247 |       |        |        |       |        |        |       |       |        |       |
| 8       | 26    | 2.065  | -0.010 | 0.013 | 0.550  | -0.011 | 0.581 | 1.020 | -0.024 | 0.250 |
| 304.837 |       |        |        |       |        |        |       |       |        |       |
| 5       | 30.9  | 0.965  | -0.008 | 0.244 | 2.573  | -0.097 | 0.005 | 0.391 | -0.015 | 0.680 |
| 305.156 |       |        |        |       |        |        |       |       |        |       |
| 5       | 111.4 | 1.299  | 0.012  | 0.137 | 2.812  | 0.115  | 0.003 | 1.321 | 0.055  | 0.158 |
| 306.242 |       |        |        |       |        |        |       |       |        |       |
| 4       | 20.2  | 1.431  | 0.005  | 0.085 | 0.969  | 0.013  | 0.300 | 2.093 | 0.031  | 0.019 |
| 306.828 |       |        |        |       |        |        |       |       |        |       |
| 4       | 72    | 2.085  | -0.012 | 0.012 | 0.797  | -0.018 | 0.440 | 2.705 | -0.069 | 0.002 |
| 307.110 |       |        |        |       |        |        |       |       |        |       |
| 9       | 20.2  | 1.366  | 0.010  | 0.111 | 3.310  | 0.103  | 0.000 | 0.686 | 0.023  | 0.450 |
| 307.910 |       |        |        |       |        |        |       |       |        |       |
| 4       | 213.4 | 0.537  | -0.004 | 0.535 | 0.213  | -0.002 | 0.935 | 2.144 | -0.069 | 0.016 |
| 309.938 |       |        |        |       |        |        |       |       |        |       |
| 8       | 75.7  | 1.513  | 0.014  | 0.076 | 2.068  | 0.086  | 0.031 | 1.118 | 0.042  | 0.300 |
| 311.145 |       |        |        |       |        |        |       |       |        |       |
| 130.3   | 2.257 | 0.015  | 0.005  | 2.601 | 0.073  | 0.007  | 2.402 | 0.075 | 0.006  |       |
| 312.910 |       |        |        |       |        |        |       |       |        |       |
| 3       | 96.6  | 1.565  | -0.016 | 0.058 | 0.971  | -0.043 | 0.299 | 2.727 | -0.127 | 0.002 |
| 313.035 |       |        |        |       |        |        |       |       |        |       |
| 3       | 99.4  | 1.868  | 0.013  | 0.048 | 2.471  | 0.075  | 0.016 | 1.949 | 0.061  | 0.053 |
| 313.309 |       |        |        |       |        |        |       |       |        |       |
| 6       | 248.3 | 2.110  | -0.022 | 0.011 | 1.176  | -0.055 | 0.204 | 1.583 | -0.078 | 0.072 |
| 314.081 |       |        |        |       |        |        |       |       |        |       |
| 7       | 89.6  | 1.498  | 0.014  | 0.080 | 2.196  | 0.093  | 0.020 | 0.883 | 0.035  | 0.391 |
| 314.774 |       |        |        |       |        |        |       |       |        |       |
| 7       | 76.5  | 0.988  | 0.009  | 0.245 | 2.255  | 0.090  | 0.015 | 1.223 | 0.052  | 0.169 |
| 316.247 |       |        |        |       |        |        |       |       |        |       |
| 9       | 50.2  | 1.677  | -0.013 | 0.056 | 2.153  | -0.075 | 0.020 | 2.011 | -0.072 | 0.026 |
| 317.251 |       |        |        |       |        |        |       |       |        |       |
| 1       | 50.7  | 1.916  | -0.015 | 0.026 | 2.225  | -0.081 | 0.017 | 2.233 | -0.084 | 0.013 |
| 317.268 |       |        |        |       |        |        |       |       |        |       |
| 3       | 45.1  | 2.278  | -0.023 | 0.007 | 1.278  | -0.057 | 0.172 | 2.430 | -0.114 | 0.007 |
| 318.241 |       |        |        |       |        |        |       |       |        |       |
| 6       | 41    | 0.775  | -0.005 | 0.391 | 2.017  | -0.060 | 0.029 | 0.378 | 0.000  | 0.994 |

|         |       |        |        |       |        |        |       |        |        |       |  |
|---------|-------|--------|--------|-------|--------|--------|-------|--------|--------|-------|--|
| 318.271 |       |        |        |       |        |        |       |        |        |       |  |
| 6       | 43.6  | 2.093  | -0.024 | 0.015 | 2.269  | -0.116 | 0.016 | 1.309  | -0.068 | 0.161 |  |
| 319.164 |       |        |        |       |        |        |       |        |        |       |  |
| 2       | 56.6  | 1.745  | -0.017 | 0.040 | 0.430  | -0.018 | 0.654 | 2.080  | -0.093 | 0.022 |  |
| 320.154 |       |        |        |       |        |        |       |        |        |       |  |
| 8       | 66.2  | 2.064  | 0.017  | 0.013 | 2.064  | 0.071  | 0.032 | 1.600  | 0.056  | 0.091 |  |
| 323.174 |       |        |        |       |        |        |       |        |        |       |  |
| 7       | 114.3 | 1.672  | 0.015  | 0.043 | 2.284  | 0.088  | 0.013 | 1.652  | 0.067  | 0.062 |  |
| 323.930 |       |        |        |       |        |        |       |        |        |       |  |
| 6       | 293.7 | 1.131  | -0.008 | 0.254 | 2.167  | -0.072 | 0.025 | 0.969  | -0.032 | 0.324 |  |
| 325.159 |       |        |        |       |        |        |       |        |        |       |  |
| 5       | 276.6 | 0.890  | -0.008 | 0.357 | 0.542  | 0.013  | 0.761 | 2.389  | -0.114 | 0.009 |  |
| 325.966 |       |        |        |       |        |        |       |        |        |       |  |
| 2       | 72.2  | 2.242  | -0.018 | 0.016 | 2.707  | -0.103 | 0.006 | 1.043  | -0.038 | 0.316 |  |
| 326.885 |       |        |        |       |        |        |       |        |        |       |  |
| 6       | 77.7  | 2.053  | -0.012 | 0.013 | 1.325  | -0.032 | 0.171 | 2.560  | -0.067 | 0.004 |  |
| 328.062 |       |        |        |       |        |        |       |        |        |       |  |
| 2       | 85.3  | 1.122  | -0.011 | 0.192 | 2.144  | -0.093 | 0.024 | 0.609  | -0.028 | 0.507 |  |
| 330.187 |       |        |        |       |        |        |       |        |        |       |  |
| 9       | 134.3 | 1.367  | 0.009  | 0.097 | 2.659  | 0.072  | 0.005 | 0.908  | 0.025  | 0.342 |  |
| 330.749 |       |        |        |       |        |        |       |        |        |       |  |
| 74.8    | 1.860 | -0.015 | 0.033  | 0.625 | -0.022 | 0.521  | 2.397 | -0.092 | 0.007  |       |  |
| 331.091 |       |        |        |       |        |        |       |        |        |       |  |
| 5       | 109.9 | 0.277  | 0.000  | 0.989 | 0.727  | 0.015  | 0.453 | 2.123  | -0.045 | 0.025 |  |
| 332.242 |       |        |        |       |        |        |       |        |        |       |  |
| 8       | 51.7  | 2.349  | -0.025 | 0.005 | 2.956  | -0.140 | 0.001 | 2.184  | -0.108 | 0.014 |  |
| 333.126 |       |        |        |       |        |        |       |        |        |       |  |
| 9       | 137.6 | 1.965  | 0.012  | 0.016 | 3.128  | 0.084  | 0.001 | 1.635  | 0.046  | 0.067 |  |
| 334.130 |       |        |        |       |        |        |       |        |        |       |  |
| 7       | 134.3 | 2.184  | 0.020  | 0.007 | 2.245  | 0.089  | 0.015 | 1.733  | 0.073  | 0.049 |  |
| 335.983 |       |        |        |       |        |        |       |        |        |       |  |
| 3       | 118.4 | 2.191  | 0.016  | 0.007 | 2.309  | 0.075  | 0.012 | 2.235  | 0.077  | 0.011 |  |
| 336.128 |       |        |        |       |        |        |       |        |        |       |  |
| 19.9    | 2.015 | -0.021 | 0.016  | 2.216 | -0.099 | 0.018  | 1.518 | -0.073 | 0.085  |       |  |
| 336.309 |       |        |        |       |        |        |       |        |        |       |  |
| 8       | 28.6  | 2.008  | -0.019 | 0.017 | 1.900  | -0.078 | 0.043 | 1.593  | -0.068 | 0.080 |  |
| 338.889 |       |        |        |       |        |        |       |        |        |       |  |
| 82.1    | 1.191 | -0.009 | 0.180  | 1.176 | -0.040 | 0.221  | 2.004 | -0.074 | 0.026  |       |  |
| 339.051 |       |        |        |       |        |        |       |        |        |       |  |
| 2       | 90.6  | 2.328  | -0.022 | 0.004 | 1.464  | -0.060 | 0.120 | 3.067  | -0.136 | 0.000 |  |
| 339.162 |       |        |        |       |        |        |       |        |        |       |  |
| 5       | 63.7  | 1.272  | 0.012  | 0.133 | 2.335  | 0.099  | 0.011 | 0.953  | 0.035  | 0.375 |  |
| 342.263 |       |        |        |       |        |        |       |        |        |       |  |
| 4       | 49.4  | 1.711  | -0.014 | 0.051 | 2.346  | -0.092 | 0.011 | 1.863  | -0.075 | 0.041 |  |
| 342.948 |       |        |        |       |        |        |       |        |        |       |  |
| 83.4    | 3.364 | -0.030 | 0.000  | 2.908 | -0.115 | 0.002  | 3.290 | -0.136 | 0.000  |       |  |
| 343.045 |       |        |        |       |        |        |       |        |        |       |  |
| 7       | 102.2 | 0.611  | -0.001 | 0.903 | 2.204  | -0.074 | 0.035 | 0.694  | 0.025  | 0.478 |  |
| 343.266 |       |        |        |       |        |        |       |        |        |       |  |
| 8       | 49.7  | 2.081  | -0.018 | 0.015 | 2.617  | -0.100 | 0.005 | 1.972  | -0.079 | 0.028 |  |
| 343.311 |       |        |        |       |        |        |       |        |        |       |  |
| 3       | 43.3  | 1.542  | -0.014 | 0.073 | 1.671  | -0.066 | 0.075 | 2.556  | -0.107 | 0.004 |  |
| 344.242 |       |        |        |       |        |        |       |        |        |       |  |
| 8       | 32.7  | 1.037  | -0.010 | 0.225 | 1.235  | -0.050 | 0.194 | 2.036  | -0.089 | 0.022 |  |
| 344.279 |       |        |        |       |        |        |       |        |        |       |  |
| 48.7    | 1.607 | -0.013 | 0.070  | 2.060 | -0.077 | 0.027  | 1.754 | -0.067 | 0.055  |       |  |
| 344.728 |       |        |        |       |        |        |       |        |        |       |  |
| 7       | 74.1  | 2.603  | -0.011 | 0.002 | 1.940  | -0.037 | 0.038 | 2.975  | -0.059 | 0.001 |  |
| 345.206 |       |        |        |       |        |        |       |        |        |       |  |
| 1       | 122.3 | 1.316  | 0.011  | 0.124 | 2.253  | 0.082  | 0.017 | 0.356  | 0.013  | 0.713 |  |
| 350.809 |       |        |        |       |        |        |       |        |        |       |  |
| 1       | 72.3  | 1.807  | -0.007 | 0.032 | 1.373  | -0.021 | 0.171 | 2.022  | -0.034 | 0.028 |  |
| 350.919 |       |        |        |       |        |        |       |        |        |       |  |
| 4       | 51.1  | 1.447  | 0.012  | 0.096 | 1.706  | 0.064  | 0.073 | 2.046  | 0.082  | 0.023 |  |
| 351.217 |       |        |        |       |        |        |       |        |        |       |  |
| 1       | 115.2 | 2.028  | 0.019  | 0.013 | 1.908  | 0.076  | 0.041 | 1.792  | 0.077  | 0.041 |  |
| 351.236 |       |        |        |       |        |        |       |        |        |       |  |
| 5       | 123.6 | 2.053  | 0.020  | 0.013 | 0.586  | 0.024  | 0.543 | 0.830  | 0.035  | 0.377 |  |
| 352.200 |       |        |        |       |        |        |       |        |        |       |  |
| 6       | 116.6 | 0.830  | 0.006  | 0.326 | 2.149  | 0.069  | 0.021 | 0.335  | -0.010 | 0.744 |  |
| 354.377 |       |        |        |       |        |        |       |        |        |       |  |
| 6       | 62.5  | 1.580  | -0.013 | 0.079 | 1.951  | -0.074 | 0.042 | 2.189  | -0.088 | 0.016 |  |

|         |       |       |        |       |       |        |       |       |        |       |
|---------|-------|-------|--------|-------|-------|--------|-------|-------|--------|-------|
| 354.757 |       |       |        |       |       |        |       |       |        |       |
| 4       | 72.2  | 2.110 | -0.009 | 0.011 | 1.193 | -0.022 | 0.224 | 2.132 | -0.041 | 0.021 |
| 355.897 | 98.6  | 2.197 | -0.021 | 0.008 | 1.158 | -0.048 | 0.230 | 1.194 | -0.054 | 0.181 |
| 360.237 |       |       |        |       |       |        |       |       |        |       |
| 7       | 25    | 0.646 | 0.006  | 0.462 | 2.209 | 0.094  | 0.022 | 1.247 | 0.057  | 0.173 |
| 360.274 |       |       |        |       |       |        |       |       |        |       |
| 1       | 43.6  | 1.378 | -0.012 | 0.107 | 2.150 | -0.088 | 0.020 | 1.127 | -0.047 | 0.216 |
| 361.205 |       |       |        |       |       |        |       |       |        |       |
| 8       | 65.9  | 1.857 | 0.015  | 0.024 | 2.105 | 0.076  | 0.022 | 1.325 | 0.046  | 0.172 |
| 362.216 |       |       |        |       |       |        |       |       |        |       |
| 6       | 31    | 2.743 | -0.023 | 0.001 | 2.249 | -0.083 | 0.014 | 1.797 | -0.070 | 0.042 |
| 363.171 |       |       |        |       |       |        |       |       |        |       |
| 3       | 35.7  | 2.161 | 0.022  | 0.008 | 0.706 | 0.028  | 0.498 | 1.852 | 0.088  | 0.035 |
| 364.915 |       |       |        |       |       |        |       |       |        |       |
| 1       | 101.4 | 2.089 | 0.018  | 0.011 | 1.802 | 0.067  | 0.059 | 2.051 | 0.082  | 0.021 |
| 365.151 |       |       |        |       |       |        |       |       |        |       |
| 9       | 114.9 | 0.798 | 0.006  | 0.331 | 2.703 | 0.080  | 0.004 | 0.248 | 0.008  | 0.783 |
| 366.138 |       |       |        |       |       |        |       |       |        |       |
| 7       | 23.1  | 1.456 | -0.012 | 0.090 | 2.312 | -0.090 | 0.012 | 1.447 | -0.058 | 0.112 |
| 366.184 |       |       |        |       |       |        |       |       |        |       |
| 8       | 128.2 | 1.304 | -0.008 | 0.146 | 0.712 | -0.019 | 0.493 | 2.004 | -0.062 | 0.028 |
| 366.783 |       |       |        |       |       |        |       |       |        |       |
| 5       | 71.5  | 1.589 | -0.007 | 0.087 | 0.635 | -0.002 | 0.908 | 2.247 | -0.048 | 0.018 |
| 366.889 |       |       |        |       |       |        |       |       |        |       |
| 9       | 79    | 1.761 | -0.013 | 0.055 | 1.847 | -0.062 | 0.054 | 2.090 | -0.071 | 0.027 |
| 369.351 | 287.3 | 1.356 | 0.011  | 0.123 | 2.446 | 0.090  | 0.008 | 1.003 | 0.037  | 0.289 |
| 370.294 |       |       |        |       |       |        |       |       |        |       |
| 8       | 47.7  | 1.765 | -0.015 | 0.039 | 2.309 | -0.088 | 0.013 | 1.922 | -0.076 | 0.032 |
| 371.298 | 48.2  | 1.478 | -0.013 | 0.083 | 2.053 | -0.078 | 0.027 | 1.612 | -0.064 | 0.072 |
| 372.925 |       |       |        |       |       |        |       |       |        |       |
| 3       | 25.8  | 1.201 | 0.009  | 0.174 | 1.143 | 0.041  | 0.219 | 2.199 | 0.080  | 0.016 |
| 372.988 |       |       |        |       |       |        |       |       |        |       |
| 9       | 90.2  | 2.338 | -0.023 | 0.005 | 1.434 | -0.061 | 0.135 | 3.316 | -0.149 | 0.000 |
| 373.313 |       |       |        |       |       |        |       |       |        |       |
| 7       | 48    | 1.816 | -0.017 | 0.042 | 1.505 | -0.063 | 0.115 | 2.224 | -0.099 | 0.014 |
| 375.763 |       |       |        |       |       |        |       |       |        |       |
| 4       | 46.3  | 0.906 | -0.008 | 0.337 | 1.515 | -0.065 | 0.113 | 2.102 | -0.096 | 0.019 |
| 378.898 |       |       |        |       |       |        |       |       |        |       |
| 8       | 71.8  | 1.900 | -0.013 | 0.026 | 1.653 | -0.049 | 0.095 | 2.632 | -0.087 | 0.003 |
| 382.918 |       |       |        |       |       |        |       |       |        |       |
| 6       | 84.7  | 2.097 | 0.018  | 0.010 | 1.770 | 0.066  | 0.056 | 0.799 | 0.028  | 0.416 |
| 383.039 |       |       |        |       |       |        |       |       |        |       |
| 7       | 103   | 1.541 | 0.011  | 0.071 | 0.410 | 0.013  | 0.676 | 2.235 | 0.079  | 0.011 |
| 387.346 | 43.6  | 1.322 | -0.012 | 0.121 | 2.183 | -0.092 | 0.018 | 1.230 | -0.054 | 0.177 |
| 387.919 |       |       |        |       |       |        |       |       |        |       |
| 2       | 73.5  | 1.478 | 0.009  | 0.101 | 1.264 | 0.030  | 0.290 | 2.192 | 0.068  | 0.016 |
| 388.088 |       |       |        |       |       |        |       |       |        |       |
| 4       | 92.4  | 1.567 | 0.012  | 0.069 | 2.004 | 0.068  | 0.030 | 1.011 | 0.034  | 0.281 |
| 389.250 |       |       |        |       |       |        |       |       |        |       |
| 4       | 244.4 | 1.894 | -0.014 | 0.046 | 2.068 | -0.075 | 0.032 | 1.918 | -0.073 | 0.040 |
| 393.883 |       |       |        |       |       |        |       |       |        |       |
| 2       | 76.3  | 1.807 | 0.008  | 0.083 | 1.364 | 0.019  | 0.419 | 2.031 | 0.044  | 0.056 |
| 395.951 | 73.1  | 1.383 | -0.013 | 0.101 | 1.882 | -0.076 | 0.042 | 2.036 | -0.087 | 0.021 |
| 396.895 |       |       |        |       |       |        |       |       |        |       |
| 8       | 87.8  | 1.018 | 0.006  | 0.247 | 2.383 | 0.068  | 0.010 | 1.160 | 0.034  | 0.201 |
| 397.776 |       |       |        |       |       |        |       |       |        |       |
| 1       | 46.7  | 1.203 | -0.012 | 0.228 | 2.778 | -0.144 | 0.003 | 0.979 | -0.048 | 0.334 |
| 398.761 |       |       |        |       |       |        |       |       |        |       |
| 1       | 203.7 | 1.000 | 0.006  | 0.308 | 2.079 | 0.064  | 0.028 | 0.266 | 0.006  | 0.853 |
| 398.909 |       |       |        |       |       |        |       |       |        |       |
| 7       | 82.1  | 1.435 | 0.014  | 0.084 | 2.094 | 0.088  | 0.025 | 0.690 | 0.031  | 0.442 |
| 399.250 |       |       |        |       |       |        |       |       |        |       |
| 1       | 150.4 | 1.929 | -0.019 | 0.021 | 2.334 | -0.103 | 0.012 | 2.761 | -0.128 | 0.002 |
| 401.008 |       |       |        |       |       |        |       |       |        |       |
| 6       | 61.7  | 2.615 | -0.024 | 0.003 | 0.484 | -0.017 | 0.670 | 2.263 | -0.098 | 0.013 |
| 405.025 | 296.9 | 1.121 | -0.011 | 0.217 | 0.487 | -0.022 | 0.625 | 2.393 | -0.118 | 0.008 |



|         |       |       |        |       |       |        |       |       |        |       |  |
|---------|-------|-------|--------|-------|-------|--------|-------|-------|--------|-------|--|
| 405.966 |       |       |        |       |       |        |       |       |        |       |  |
| 1       | 104.5 | 1.698 | 0.009  | 0.074 | 1.565 | 0.028  | 0.252 | 2.291 | 0.062  | 0.013 |  |
| 406.971 |       |       |        |       |       |        |       |       |        |       |  |
| 7       | 102.6 | 2.278 | 0.023  | 0.005 | 1.148 | 0.049  | 0.232 | 2.340 | 0.109  | 0.007 |  |
| 410.855 |       |       |        |       |       |        |       |       |        |       |  |
| 7       | 87.2  | 1.303 | -0.009 | 0.111 | 0.474 | -0.003 | 0.904 | 2.009 | -0.062 | 0.023 |  |
| 416.710 |       |       |        |       |       |        |       |       |        |       |  |
| 5       | 72.4  | 2.140 | -0.009 | 0.011 | 1.098 | -0.018 | 0.302 | 2.809 | -0.054 | 0.002 |  |
| 416.956 |       |       |        |       |       |        |       |       |        |       |  |
| 6       | 109   | 1.229 | -0.009 | 0.279 | 2.321 | -0.091 | 0.019 | 1.188 | -0.044 | 0.259 |  |
| 421.956 |       |       |        |       |       |        |       |       |        |       |  |
| 7       | 97.6  | 2.300 | -0.017 | 0.007 | 0.581 | 0.018  | 0.554 | 1.640 | -0.056 | 0.069 |  |
| 422.936 |       |       |        |       |       |        |       |       |        |       |  |
| 3       | 72.7  | 2.123 | 0.010  | 0.017 | 2.278 | 0.046  | 0.019 | 2.058 | 0.041  | 0.039 |  |
| 424.869 |       |       |        |       |       |        |       |       |        |       |  |
| 1       | 76.9  | 3.051 | 0.023  | 0.000 | 1.758 | 0.058  | 0.059 | 2.299 | 0.081  | 0.009 |  |
| 426.739 |       |       |        |       |       |        |       |       |        |       |  |
| 4       | 72.1  | 2.198 | -0.017 | 0.010 | 0.375 | -0.013 | 0.686 | 1.894 | -0.070 | 0.035 |  |
| 432.801 |       |       |        |       |       |        |       |       |        |       |  |
| 9       | 50.6  | 3.045 | -0.032 | 0.000 | 3.214 | -0.145 | 0.000 | 2.881 | -0.138 | 0.001 |  |
| 433.330 |       |       |        |       |       |        |       |       |        |       |  |
| 4       | 44.5  | 1.492 | 0.012  | 0.081 | 2.995 | 0.107  | 0.001 | 1.625 | 0.060  | 0.075 |  |
| 433.804 |       |       |        |       |       |        |       |       |        |       |  |
| 6       | 45.9  | 1.737 | -0.006 | 0.100 | 1.882 | -0.035 | 0.054 | 2.050 | -0.039 | 0.035 |  |
| 434.770 |       |       |        |       |       |        |       |       |        |       |  |
| 9       | 71.7  | 2.948 | -0.024 | 0.000 | 2.305 | -0.082 | 0.012 | 3.446 | -0.129 | 0.000 |  |
| 442.868 |       |       |        |       |       |        |       |       |        |       |  |
| 8       | 31.1  | 2.237 | -0.020 | 0.007 | 1.756 | -0.067 | 0.064 | 2.095 | -0.086 | 0.018 |  |
| 444.832 |       |       |        |       |       |        |       |       |        |       |  |
| 6       | 79.5  | 1.292 | -0.011 | 0.149 | 2.211 | -0.088 | 0.019 | 0.900 | -0.035 | 0.354 |  |
| 446.370 |       |       |        |       |       |        |       |       |        |       |  |
| 5       | 43.4  | 1.696 | 0.015  | 0.038 | 1.324 | 0.051  | 0.155 | 2.065 | 0.084  | 0.019 |  |
| 446.817 |       |       |        |       |       |        |       |       |        |       |  |
| 2       | 44.2  | 1.231 | -0.011 | 0.144 | 2.179 | -0.090 | 0.018 | 1.450 | -0.063 | 0.102 |  |
| 447.989 |       |       |        |       |       |        |       |       |        |       |  |
| 9       | 103.1 | 2.136 | -0.021 | 0.012 | 1.285 | -0.056 | 0.168 | 2.745 | -0.127 | 0.002 |  |
| 449.910 |       |       |        |       |       |        |       |       |        |       |  |
| 6       | 103.9 | 1.366 | -0.014 | 0.098 | 2.056 | -0.092 | 0.026 | 1.322 | -0.062 | 0.137 |  |
| 455.817 |       |       |        |       |       |        |       |       |        |       |  |
| 9       | 56.1  | 2.113 | -0.011 | 0.018 | 1.307 | -0.032 | 0.170 | 1.266 | -0.032 | 0.165 |  |
| 455.836 |       |       |        |       |       |        |       |       |        |       |  |
| 74      | 1.969 | 0.015 | 0.022  | 1.674 | 0.047 | 0.139  | 2.397 | 0.083 | 0.009  |       |  |
| 457.823 |       |       |        |       |       |        |       |       |        |       |  |
| 4       | 54.1  | 0.893 | 0.009  | 0.302 | 2.284 | 0.106  | 0.013 | 1.548 | 0.075  | 0.083 |  |
| 458.186 |       |       |        |       |       |        |       |       |        |       |  |
| 3       | 109   | 2.481 | 0.020  | 0.003 | 3.150 | 0.112  | 0.001 | 1.807 | 0.069  | 0.040 |  |
| 460.889 |       |       |        |       |       |        |       |       |        |       |  |
| 8       | 64.1  | 1.574 | -0.011 | 0.076 | 1.962 | -0.060 | 0.043 | 2.040 | -0.068 | 0.022 |  |
| 461.272 |       |       |        |       |       |        |       |       |        |       |  |
| 43.8    | 2.254 | 0.024 | 0.005  | 1.310 | 0.059 | 0.163  | 1.665 | 0.079 | 0.063  |       |  |
| 462.642 |       |       |        |       |       |        |       |       |        |       |  |
| 8       | 75    | 1.641 | -0.007 | 0.066 | 0.559 | -0.008 | 0.646 | 2.029 | -0.039 | 0.030 |  |
| 464.639 |       |       |        |       |       |        |       |       |        |       |  |
| 8       | 74.8  | 1.934 | -0.008 | 0.028 | 0.729 | -0.011 | 0.508 | 2.141 | -0.039 | 0.022 |  |
| 468.308 |       |       |        |       |       |        |       |       |        |       |  |
| 1       | 59.7  | 1.850 | 0.013  | 0.030 | 2.297 | 0.073  | 0.016 | 1.897 | 0.063  | 0.040 |  |
| 469.311 |       |       |        |       |       |        |       |       |        |       |  |
| 6       | 60.3  | 1.791 | 0.013  | 0.037 | 2.262 | 0.072  | 0.018 | 1.793 | 0.059  | 0.055 |  |
| 470.335 |       |       |        |       |       |        |       |       |        |       |  |
| 1       | 47    | 2.234 | 0.011  | 0.011 | 1.958 | 0.042  | 0.039 | 2.136 | 0.046  | 0.024 |  |
| 470.498 |       |       |        |       |       |        |       |       |        |       |  |
| 3       | 57.5  | 2.676 | 0.012  | 0.002 | 1.658 | 0.023  | 0.212 | 2.387 | 0.044  | 0.019 |  |
| 472.674 |       |       |        |       |       |        |       |       |        |       |  |
| 9       | 83.4  | 1.967 | -0.014 | 0.016 | 2.791 | -0.088 | 0.002 | 2.036 | -0.066 | 0.024 |  |
| 472.915 |       |       |        |       |       |        |       |       |        |       |  |
| 7       | 83.9  | 1.148 | -0.009 | 0.176 | 2.361 | -0.083 | 0.012 | 0.466 | -0.016 | 0.642 |  |
| 474.669 |       |       |        |       |       |        |       |       |        |       |  |
| 1       | 72.1  | 1.620 | -0.008 | 0.065 | 0.825 | -0.017 | 0.437 | 2.185 | -0.053 | 0.017 |  |

|         |       |       |        |       |       |        |       |       |        |       |  |
|---------|-------|-------|--------|-------|-------|--------|-------|-------|--------|-------|--|
| 474.939 |       |       |        |       |       |        |       |       |        |       |  |
| 1       | 98    | 1.377 | 0.010  | 0.098 | 1.616 | 0.049  | 0.085 | 2.227 | 0.073  | 0.011 |  |
| 475.887 |       |       |        |       |       |        |       |       |        |       |  |
| 1       | 72.8  | 2.358 | -0.022 | 0.005 | 1.265 | -0.053 | 0.176 | 1.969 | -0.087 | 0.028 |  |
| 476.306 |       |       |        |       |       |        |       |       |        |       |  |
| 4       | 53.2  | 1.691 | 0.017  | 0.038 | 1.730 | 0.074  | 0.060 | 2.193 | 0.099  | 0.013 |  |
| 478.33  | 59.6  | 1.757 | 0.008  | 0.081 | 2.111 | 0.047  | 0.032 | 1.390 | 0.025  | 0.257 |  |
| 478.930 |       |       |        |       |       |        |       |       |        |       |  |
| 3       | 87.6  | 2.114 | 0.020  | 0.010 | 1.787 | 0.071  | 0.067 | 1.724 | 0.073  | 0.059 |  |
| 480.704 |       |       |        |       |       |        |       |       |        |       |  |
| 2       | 72.3  | 1.532 | -0.013 | 0.062 | 0.977 | -0.034 | 0.303 | 2.615 | -0.099 | 0.003 |  |
| 482.323 |       |       |        |       |       |        |       |       |        |       |  |
| 8       | 58.5  | 2.114 | 0.011  | 0.015 | 1.653 | 0.032  | 0.144 | 1.765 | 0.037  | 0.098 |  |
| 483.325 |       |       |        |       |       |        |       |       |        |       |  |
| 7       | 58.4  | 2.232 | 0.012  | 0.008 | 1.878 | 0.041  | 0.067 | 1.887 | 0.042  | 0.062 |  |
| 483.849 |       |       |        |       |       |        |       |       |        |       |  |
| 5       | 48.8  | 2.255 | 0.008  | 0.010 | 1.668 | 0.026  | 0.104 | 1.589 | 0.024  | 0.138 |  |
| 484.787 | 73.7  | 2.222 | -0.020 | 0.013 | 0.963 | -0.036 | 0.368 | 2.325 | -0.104 | 0.010 |  |
| 484.867 |       |       |        |       |       |        |       |       |        |       |  |
| 8       | 44.4  | 1.837 | 0.019  | 0.043 | 0.679 | 0.031  | 0.494 | 2.145 | 0.108  | 0.019 |  |
| 487.919 |       |       |        |       |       |        |       |       |        |       |  |
| 3       | 30    | 2.036 | -0.019 | 0.013 | 1.424 | -0.056 | 0.132 | 1.904 | -0.081 | 0.030 |  |
| 489.937 |       |       |        |       |       |        |       |       |        |       |  |
| 4       | 85.4  | 0.538 | -0.005 | 0.522 | 2.210 | -0.088 | 0.016 | 0.328 | 0.008  | 0.821 |  |
| 491.292 |       |       |        |       |       |        |       |       |        |       |  |
| 3       | 64.9  | 2.004 | 0.018  | 0.014 | 2.160 | 0.081  | 0.022 | 2.161 | 0.088  | 0.014 |  |
| 493.394 |       |       |        |       |       |        |       |       |        |       |  |
| 1       | 56.6  | 2.411 | 0.008  | 0.003 | 1.518 | 0.020  | 0.106 | 1.907 | 0.027  | 0.035 |  |
| 494.836 |       |       |        |       |       |        |       |       |        |       |  |
| 6       | 81.1  | 0.758 | -0.007 | 0.358 | 0.724 | -0.019 | 0.621 | 2.072 | -0.091 | 0.018 |  |
| 496.134 |       |       |        |       |       |        |       |       |        |       |  |
| 4       | 58.1  | 2.620 | 0.011  | 0.002 | 2.106 | 0.035  | 0.041 | 2.264 | 0.041  | 0.018 |  |
| 496.330 |       |       |        |       |       |        |       |       |        |       |  |
| 8       | 58.2  | 1.958 | 0.008  | 0.016 | 2.638 | 0.044  | 0.004 | 1.342 | 0.024  | 0.130 |  |
| 496.339 |       |       |        |       |       |        |       |       |        |       |  |
| 8       | 58.1  | 2.422 | 0.009  | 0.007 | 2.064 | 0.030  | 0.061 | 2.049 | 0.030  | 0.058 |  |
| 496.543 | 58.6  | 2.478 | 0.009  | 0.004 | 2.062 | 0.030  | 0.056 | 2.160 | 0.034  | 0.030 |  |
| 497.343 | 58.1  | 2.406 | 0.009  | 0.008 | 2.032 | 0.029  | 0.068 | 2.021 | 0.030  | 0.065 |  |
| 498.345 |       |       |        |       |       |        |       |       |        |       |  |
| 9       | 58.1  | 2.420 | 0.009  | 0.007 | 2.054 | 0.030  | 0.061 | 2.012 | 0.030  | 0.063 |  |
| 499.347 |       |       |        |       |       |        |       |       |        |       |  |
| 2       | 58.1  | 2.190 | 0.007  | 0.013 | 1.935 | 0.028  | 0.065 | 1.837 | 0.026  | 0.083 |  |
| 499.842 |       |       |        |       |       |        |       |       |        |       |  |
| 6       | 69.4  | 2.279 | 0.016  | 0.005 | 1.718 | 0.051  | 0.069 | 1.966 | 0.061  | 0.031 |  |
| 500.351 |       |       |        |       |       |        |       |       |        |       |  |
| 3       | 52.7  | 2.186 | 0.007  | 0.024 | 1.387 | 0.020  | 0.192 | 1.683 | 0.020  | 0.188 |  |
| 500.856 |       |       |        |       |       |        |       |       |        |       |  |
| 1       | 80    | 1.529 | 0.014  | 0.087 | 0.608 | 0.021  | 0.597 | 2.232 | 0.100  | 0.012 |  |
| 501.268 |       |       |        |       |       |        |       |       |        |       |  |
| 1       | 133.4 | 1.228 | 0.007  | 0.144 | 2.190 | 0.054  | 0.027 | 1.068 | 0.029  | 0.238 |  |
| 503.965 |       |       |        |       |       |        |       |       |        |       |  |
| 6       | 103.1 | 1.781 | -0.012 | 0.030 | 2.026 | -0.059 | 0.031 | 2.231 | -0.069 | 0.011 |  |
| 505.308 |       |       |        |       |       |        |       |       |        |       |  |
| 7       | 64.1  | 1.332 | 0.013  | 0.107 | 2.165 | 0.090  | 0.020 | 0.403 | 0.017  | 0.670 |  |
| 507.890 |       |       |        |       |       |        |       |       |        |       |  |
| 2       | 93.6  | 2.066 | -0.018 | 0.012 | 1.304 | -0.049 | 0.168 | 2.707 | -0.110 | 0.002 |  |
| 508.861 |       |       |        |       |       |        |       |       |        |       |  |
| 8       | 58.9  | 2.708 | 0.019  | 0.001 | 2.077 | 0.063  | 0.028 | 1.851 | 0.059  | 0.042 |  |
| 511.797 |       |       |        |       |       |        |       |       |        |       |  |
| 6       | 76.9  | 1.906 | 0.007  | 0.060 | 1.217 | 0.014  | 0.459 | 2.102 | 0.038  | 0.048 |  |
| 512.360 |       |       |        |       |       |        |       |       |        |       |  |
| 4       | 56.5  | 1.303 | -0.004 | 0.493 | 2.037 | -0.056 | 0.068 | 1.289 | -0.025 | 0.419 |  |
| 513.021 |       |       |        |       |       |        |       |       |        |       |  |
| 8       | 46.4  | 2.140 | -0.025 | 0.008 | 2.186 | -0.111 | 0.018 | 1.286 | -0.068 | 0.147 |  |
| 516.024 |       |       |        |       |       |        |       |       |        |       |  |
| 1       | 43.7  | 1.711 | -0.017 | 0.042 | 2.179 | -0.092 | 0.022 | 1.658 | -0.075 | 0.065 |  |

|         |       |       |        |       |       |        |       |       |        |       |
|---------|-------|-------|--------|-------|-------|--------|-------|-------|--------|-------|
| 516.084 |       |       |        |       |       |        |       |       |        |       |
| 9       | 85    | 0.405 | 0.002  | 0.804 | 2.266 | 0.080  | 0.022 | 1.054 | 0.035  | 0.323 |
| 516.856 |       |       |        |       |       |        |       |       |        |       |
| 5       | 43.6  | 1.890 | -0.021 | 0.023 | 1.462 | -0.073 | 0.116 | 2.187 | -0.114 | 0.014 |
| 517.377 |       |       |        |       |       |        |       |       |        |       |
| 3       | 48.6  | 1.424 | 0.013  | 0.084 | 2.186 | 0.088  | 0.017 | 1.014 | 0.043  | 0.253 |
| 518.321 |       |       |        |       |       |        |       |       |        |       |
| 9       | 67.9  | 2.190 | 0.006  | 0.013 | 2.028 | 0.025  | 0.041 | 1.797 | 0.021  | 0.087 |
| 519.323 |       |       |        |       |       |        |       |       |        |       |
| 1       | 68.4  | 2.444 | 0.007  | 0.006 | 1.693 | 0.020  | 0.129 | 2.059 | 0.025  | 0.050 |
| 521.135 |       |       |        |       |       |        |       |       |        |       |
| 6       | 49.7  | 0.645 | -0.006 | 0.450 | 2.371 | -0.100 | 0.011 | 1.033 | -0.046 | 0.246 |
| 521.343 |       |       |        |       |       |        |       |       |        |       |
| 2       | 57.6  | 1.604 | 0.013  | 0.057 | 1.240 | 0.044  | 0.181 | 2.006 | 0.075  | 0.024 |
| 522.134 |       |       |        |       |       |        |       |       |        |       |
| 2       | 56.7  | 0.527 | -0.005 | 0.553 | 2.106 | -0.088 | 0.022 | 0.257 | -0.009 | 0.812 |
| 522.345 |       |       |        |       |       |        |       |       |        |       |
| 7       | 58.6  | 2.183 | 0.026  | 0.008 | 1.508 | 0.079  | 0.102 | 2.028 | 0.111  | 0.022 |
| 522.599 |       |       |        |       |       |        |       |       |        |       |
| 73.5    | 73.5  | 1.699 | -0.008 | 0.053 | 0.958 | -0.021 | 0.316 | 2.052 | -0.047 | 0.026 |
| 522.688 |       |       |        |       |       |        |       |       |        |       |
| 7       | 73.4  | 1.398 | -0.007 | 0.105 | 1.002 | -0.019 | 0.362 | 2.408 | -0.057 | 0.006 |
| 524.371 |       |       |        |       |       |        |       |       |        |       |
| 4       | 57.1  | 2.156 | 0.009  | 0.019 | 1.659 | 0.024  | 0.194 | 2.070 | 0.035  | 0.055 |
| 525.374 |       |       |        |       |       |        |       |       |        |       |
| 7       | 57.1  | 2.164 | 0.009  | 0.018 | 1.671 | 0.024  | 0.188 | 2.006 | 0.034  | 0.070 |
| 526.375 |       |       |        |       |       |        |       |       |        |       |
| 5       | 56.4  | 2.230 | 0.009  | 0.014 | 1.759 | 0.026  | 0.160 | 1.997 | 0.033  | 0.077 |
| 527.378 |       |       |        |       |       |        |       |       |        |       |
| 7       | 56.4  | 2.276 | 0.009  | 0.010 | 1.850 | 0.029  | 0.099 | 2.185 | 0.037  | 0.035 |
| 534.625 |       |       |        |       |       |        |       |       |        |       |
| 7       | 72.9  | 1.730 | -0.013 | 0.037 | 0.955 | -0.026 | 0.400 | 2.369 | -0.083 | 0.007 |
| 534.713 |       |       |        |       |       |        |       |       |        |       |
| 7       | 65    | 0.243 | -0.002 | 0.779 | 2.438 | -0.076 | 0.009 | 0.984 | -0.033 | 0.264 |
| 540.304 |       |       |        |       |       |        |       |       |        |       |
| 8       | 65.6  | 2.763 | 0.025  | 0.001 | 1.907 | 0.075  | 0.040 | 1.880 | 0.078  | 0.033 |
| 541.704 |       |       |        |       |       |        |       |       |        |       |
| 4       | 42.1  | 1.999 | -0.020 | 0.014 | 2.058 | -0.090 | 0.027 | 1.500 | -0.065 | 0.110 |
| 541.942 |       |       |        |       |       |        |       |       |        |       |
| 9       | 100.1 | 1.726 | 0.008  | 0.057 | 1.740 | 0.031  | 0.113 | 2.249 | 0.048  | 0.014 |
| 546.352 |       |       |        |       |       |        |       |       |        |       |
| 1       | 62.3  | 2.665 | 0.012  | 0.002 | 2.251 | 0.044  | 0.024 | 2.302 | 0.045  | 0.022 |
| 547.355 |       |       |        |       |       |        |       |       |        |       |
| 7       | 62.6  | 2.198 | 0.014  | 0.009 | 2.146 | 0.058  | 0.027 | 2.133 | 0.060  | 0.022 |
| 548.365 |       |       |        |       |       |        |       |       |        |       |
| 6       | 60.1  | 2.259 | 0.012  | 0.006 | 2.700 | 0.062  | 0.003 | 2.055 | 0.046  | 0.030 |
| 549.378 |       |       |        |       |       |        |       |       |        |       |
| 6       | 53.1  | 2.330 | 0.013  | 0.005 | 2.933 | 0.070  | 0.001 | 2.029 | 0.049  | 0.026 |
| 549.401 |       |       |        |       |       |        |       |       |        |       |
| 8       | 104   | 1.504 | -0.015 | 0.072 | 2.001 | -0.090 | 0.030 | 1.323 | -0.063 | 0.136 |
| 549.885 |       |       |        |       |       |        |       |       |        |       |
| 9       | 45.6  | 2.120 | 0.009  | 0.040 | 1.090 | 0.013  | 0.552 | 1.709 | 0.030  | 0.189 |
| 550.601 |       |       |        |       |       |        |       |       |        |       |
| 3       | 76.7  | 1.311 | -0.011 | 0.122 | 0.610 | -0.021 | 0.530 | 2.003 | -0.076 | 0.025 |
| 551.020 |       |       |        |       |       |        |       |       |        |       |
| 8       | 131.9 | 1.585 | 0.012  | 0.059 | 2.086 | 0.072  | 0.023 | 1.730 | 0.062  | 0.051 |
| 562.633 |       |       |        |       |       |        |       |       |        |       |
| 77.7    | 77.7  | 1.469 | -0.005 | 0.144 | 2.122 | -0.039 | 0.024 | 0.887 | -0.012 | 0.494 |
| 563.063 |       |       |        |       |       |        |       |       |        |       |
| 5       | 48.1  | 1.364 | -0.014 | 0.103 | 2.401 | -0.108 | 0.010 | 1.667 | -0.080 | 0.058 |
| 564.892 |       |       |        |       |       |        |       |       |        |       |
| 5       | 45.9  | 2.021 | 0.007  | 0.048 | 1.205 | 0.015  | 0.382 | 1.580 | 0.020  | 0.244 |
| 567.004 |       |       |        |       |       |        |       |       |        |       |
| 1       | 87.3  | 2.239 | 0.014  | 0.008 | 1.206 | 0.026  | 0.309 | 1.689 | 0.049  | 0.059 |
| 569.649 |       |       |        |       |       |        |       |       |        |       |
| 4       | 41.6  | 1.428 | -0.013 | 0.086 | 0.996 | -0.040 | 0.297 | 2.048 | -0.089 | 0.021 |
| 570.352 |       |       |        |       |       |        |       |       |        |       |
| 56.6    | 56.6  | 2.140 | 0.013  | 0.011 | 1.468 | 0.039  | 0.141 | 1.981 | 0.056  | 0.033 |
| 570.456 |       |       |        |       |       |        |       |       |        |       |
| 4       | 46.5  | 1.917 | -0.013 | 0.073 | 1.711 | -0.057 | 0.102 | 2.166 | -0.075 | 0.033 |

|          |       |       |        |       |       |        |       |       |        |       |
|----------|-------|-------|--------|-------|-------|--------|-------|-------|--------|-------|
| 571.3567 | 56.9  | 2.221 | 0.015  | 0.007 | 1.591 | 0.044  | 0.103 | 2.096 | 0.064  | 0.020 |
| 578.2754 | 73    | 2.042 | 0.006  | 0.025 | 1.988 | 0.026  | 0.063 | 1.574 | 0.018  | 0.198 |
| 580.5575 | 74.4  | 2.006 | -0.010 | 0.020 | 1.390 | -0.032 | 0.142 | 2.390 | -0.057 | 0.008 |
| 583.7724 | 74.1  | 1.584 | 0.006  | 0.083 | 1.426 | 0.023  | 0.215 | 2.084 | 0.041  | 0.024 |
| 584.5239 | 42.6  | 2.003 | -0.020 | 0.017 | 0.879 | -0.038 | 0.357 | 1.415 | -0.065 | 0.116 |
| 586.4203 | 44.8  | 2.063 | 0.010  | 0.035 | 1.520 | 0.030  | 0.186 | 1.680 | 0.032  | 0.153 |
| 587.4609 | 44    | 0.893 | -0.006 | 0.363 | 2.221 | -0.071 | 0.017 | 1.016 | -0.031 | 0.307 |
| 587.6627 | 41.6  | 1.090 | -0.011 | 0.204 | 2.552 | -0.116 | 0.007 | 0.285 | -0.001 | 0.990 |
| 591.0016 | 84.7  | 0.283 | 0.002  | 0.796 | 0.294 | -0.012 | 0.756 | 2.354 | -0.100 | 0.009 |
| 592.8131 | 32.5  | 1.430 | -0.013 | 0.096 | 0.392 | -0.012 | 0.755 | 2.385 | -0.104 | 0.008 |
| 594.2502 | 68.9  | 1.071 | 0.009  | 0.208 | 2.199 | 0.078  | 0.018 | 0.528 | 0.018  | 0.596 |
| 594.9123 | 52.2  | 2.042 | 0.010  | 0.035 | 1.231 | 0.024  | 0.280 | 1.753 | 0.038  | 0.097 |
| 596.939  | 83.6  | 0.609 | -0.003 | 0.656 | 2.479 | -0.094 | 0.008 | 0.920 | -0.030 | 0.406 |
| 597.3673 | 95.1  | 2.333 | -0.019 | 0.004 | 3.503 | -0.127 | 0.000 | 1.764 | -0.067 | 0.046 |
| 598.529  | 75.4  | 1.208 | 0.011  | 0.161 | 2.094 | 0.084  | 0.023 | 1.577 | 0.065  | 0.082 |
| 598.6206 | 64    | 2.376 | -0.023 | 0.004 | 1.094 | -0.028 | 0.481 | 3.036 | -0.136 | 0.001 |
| 598.8092 | 73.6  | 0.876 | 0.006  | 0.381 | 2.231 | 0.086  | 0.015 | 1.165 | 0.044  | 0.218 |
| 600.6154 | 72.3  | 3.250 | -0.025 | 0.000 | 1.614 | -0.053 | 0.082 | 1.612 | -0.056 | 0.068 |
| 603.5342 | 43.1  | 1.349 | -0.010 | 0.222 | 2.209 | -0.081 | 0.037 | 1.440 | -0.050 | 0.206 |
| 608.3173 | 63.9  | 0.877 | -0.008 | 0.284 | 0.342 | 0.002  | 0.969 | 2.362 | -0.103 | 0.007 |
| 610.9309 | 64.1  | 2.249 | 0.010  | 0.017 | 1.444 | 0.025  | 0.215 | 2.146 | 0.043  | 0.034 |
| 613.8315 | 41.7  | 1.397 | -0.014 | 0.106 | 1.677 | -0.073 | 0.091 | 2.053 | -0.101 | 0.020 |
| 614.5339 | 44.7  | 1.743 | -0.016 | 0.034 | 1.226 | -0.050 | 0.185 | 2.230 | -0.096 | 0.011 |
| 619.4893 | 42.5  | 2.756 | -0.024 | 0.001 | 1.863 | -0.070 | 0.043 | 2.188 | -0.088 | 0.013 |
| 619.5918 | 41.1  | 2.192 | -0.024 | 0.007 | 2.868 | -0.138 | 0.002 | 1.333 | -0.064 | 0.155 |
| 620.0922 | 41.6  | 2.112 | 0.025  | 0.011 | 2.209 | 0.116  | 0.017 | 1.680 | 0.090  | 0.067 |
| 620.9342 | 73.6  | 1.599 | -0.015 | 0.063 | 2.497 | -0.105 | 0.009 | 2.215 | -0.099 | 0.014 |
| 622.4013 | 102.5 | 1.102 | 0.007  | 0.177 | 0.563 | 0.013  | 0.586 | 2.329 | 0.065  | 0.008 |
| 623.855  | 35    | 1.769 | -0.016 | 0.035 | 1.451 | -0.058 | 0.122 | 2.418 | -0.102 | 0.006 |
| 627.6893 | 42.3  | 1.621 | -0.017 | 0.048 | 2.064 | -0.092 | 0.026 | 1.244 | -0.059 | 0.163 |
| 627.7146 | 74.4  | 0.756 | -0.005 | 0.496 | 2.117 | -0.075 | 0.032 | 0.716 | -0.024 | 0.503 |
| 628.5764 | 73.9  | 1.607 | 0.014  | 0.074 | 2.003 | 0.082  | 0.034 | 2.054 | 0.086  | 0.026 |
| 629.3495 | 100.8 | 1.843 | -0.020 | 0.024 | 3.938 | -0.183 | 0.000 | 1.456 | -0.067 | 0.125 |
| 630.0993 | 41.8  | 1.461 | 0.018  | 0.089 | 2.071 | 0.112  | 0.029 | 1.020 | 0.058  | 0.261 |
| 631.3604 | 99.4  | 1.557 | 0.012  | 0.057 | 2.692 | 0.092  | 0.004 | 1.164 | 0.043  | 0.188 |

|         |       |       |        |       |       |        |       |       |        |       |
|---------|-------|-------|--------|-------|-------|--------|-------|-------|--------|-------|
| 631.838 | 43.4  | 1.785 | -0.018 | 0.033 | 1.436 | -0.060 | 0.143 | 2.102 | -0.097 | 0.018 |
| 632.186 |       |       |        |       |       |        |       |       |        |       |
| 5       | 44.9  | 2.010 | -0.022 | 0.013 | 1.839 | -0.087 | 0.047 | 1.242 | -0.060 | 0.174 |
| 633.727 |       |       |        |       |       |        |       |       |        |       |
| 4       | 61.9  | 1.831 | -0.018 | 0.040 | 2.093 | -0.095 | 0.026 | 1.883 | -0.089 | 0.039 |
| 637.879 | 101.8 | 1.207 | -0.010 | 0.140 | 0.326 | -0.004 | 0.916 | 2.173 | -0.084 | 0.014 |
| 638.946 |       |       |        |       |       |        |       |       |        |       |
| 5       | 63.8  | 2.086 | 0.012  | 0.017 | 1.309 | 0.025  | 0.321 | 1.461 | 0.035  | 0.181 |
| 640.441 |       |       |        |       |       |        |       |       |        |       |
| 5       | 45.8  | 2.156 | 0.008  | 0.017 | 1.196 | 0.019  | 0.235 | 1.927 | 0.031  | 0.051 |
| 641.278 |       |       |        |       |       |        |       |       |        |       |
| 6       | 41.3  | 2.140 | -0.014 | 0.023 | 2.041 | -0.059 | 0.041 | 2.711 | -0.086 | 0.003 |
| 642.384 |       |       |        |       |       |        |       |       |        |       |
| 1       | 103.5 | 1.291 | -0.010 | 0.124 | 2.107 | -0.071 | 0.026 | 2.043 | -0.075 | 0.021 |
| 642.599 |       |       |        |       |       |        |       |       |        |       |
| 9       | 58.7  | 2.113 | -0.014 | 0.010 | 1.291 | -0.032 | 0.211 | 2.394 | -0.070 | 0.007 |
| 643.527 |       |       |        |       |       |        |       |       |        |       |
| 2       | 41.7  | 1.993 | -0.020 | 0.014 | 1.977 | -0.086 | 0.034 | 2.122 | -0.098 | 0.016 |
| 643.873 |       |       |        |       |       |        |       |       |        |       |
| 1       | 55.3  | 1.527 | -0.016 | 0.066 | 2.571 | -0.118 | 0.005 | 1.253 | -0.060 | 0.161 |
| 643.923 |       |       |        |       |       |        |       |       |        |       |
| 1       | 104.6 | 1.630 | 0.013  | 0.052 | 2.382 | 0.081  | 0.010 | 1.233 | 0.039  | 0.223 |
| 645.034 |       |       |        |       |       |        |       |       |        |       |
| 7       | 85.8  | 0.729 | -0.007 | 0.433 | 2.117 | 0.086  | 0.033 | 0.687 | -0.030 | 0.466 |
| 648.655 |       |       |        |       |       |        |       |       |        |       |
| 2       | 45.1  | 1.474 | -0.015 | 0.074 | 1.092 | -0.045 | 0.280 | 2.126 | -0.102 | 0.016 |
| 650.63  | 69.9  | 1.483 | -0.011 | 0.071 | 1.411 | -0.044 | 0.157 | 2.115 | -0.075 | 0.016 |
| 651.883 |       |       |        |       |       |        |       |       |        |       |
| 1       | 102.9 | 0.888 | -0.009 | 0.287 | 1.683 | -0.072 | 0.073 | 2.213 | -0.100 | 0.013 |
| 653.208 | 40.9  | 1.442 | 0.011  | 0.110 | 1.453 | 0.050  | 0.146 | 2.061 | 0.077  | 0.027 |
| 654.168 |       |       |        |       |       |        |       |       |        |       |
| 8       | 46.2  | 1.595 | -0.014 | 0.059 | 1.357 | -0.055 | 0.143 | 2.413 | -0.102 | 0.006 |
| 657.072 |       |       |        |       |       |        |       |       |        |       |
| 7       | 74.7  | 2.213 | 0.018  | 0.024 | 1.110 | 0.036  | 0.366 | 0.491 | 0.004  | 0.912 |
| 658.056 |       |       |        |       |       |        |       |       |        |       |
| 3       | 43.7  | 2.025 | -0.020 | 0.014 | 1.577 | -0.065 | 0.111 | 2.235 | -0.103 | 0.012 |
| 661.239 |       |       |        |       |       |        |       |       |        |       |
| 9       | 127   | 1.089 | -0.011 | 0.184 | 2.022 | -0.090 | 0.028 | 0.400 | -0.012 | 0.769 |
| 661.620 |       |       |        |       |       |        |       |       |        |       |
| 4       | 41    | 1.420 | -0.016 | 0.084 | 2.077 | -0.101 | 0.024 | 0.900 | -0.044 | 0.335 |
| 662.745 |       |       |        |       |       |        |       |       |        |       |
| 3       | 60.6  | 1.560 | -0.016 | 0.066 | 1.683 | -0.072 | 0.082 | 2.374 | -0.112 | 0.007 |
| 664.710 |       |       |        |       |       |        |       |       |        |       |
| 1       | 43.6  | 2.109 | -0.020 | 0.012 | 2.245 | -0.092 | 0.016 | 3.241 | -0.142 | 0.000 |
| 664.925 |       |       |        |       |       |        |       |       |        |       |
| 6       | 86.5  | 1.302 | -0.012 | 0.162 | 2.260 | -0.096 | 0.018 | 1.257 | -0.056 | 0.175 |
| 665.005 |       |       |        |       |       |        |       |       |        |       |
| 7       | 85    | 1.349 | 0.012  | 0.151 | 3.590 | 0.145  | 0.000 | 0.457 | 0.010  | 0.794 |
| 665.177 |       |       |        |       |       |        |       |       |        |       |
| 1       | 57.1  | 0.696 | -0.006 | 0.439 | 1.981 | -0.084 | 0.033 | 2.120 | -0.092 | 0.020 |
| 671.671 |       |       |        |       |       |        |       |       |        |       |
| 7       | 41    | 1.336 | -0.015 | 0.110 | 2.119 | -0.102 | 0.023 | 1.748 | -0.088 | 0.050 |
| 673.792 |       |       |        |       |       |        |       |       |        |       |
| 5       | 40.9  | 1.601 | -0.017 | 0.052 | 0.624 | -0.013 | 0.771 | 2.089 | -0.103 | 0.018 |
| 674.772 | 95.2  | 2.051 | -0.019 | 0.014 | 0.964 | -0.039 | 0.300 | 1.376 | -0.059 | 0.121 |
| 675.219 |       |       |        |       |       |        |       |       |        |       |
| 6       | 41.1  | 1.942 | -0.019 | 0.018 | 1.617 | -0.068 | 0.085 | 2.617 | -0.117 | 0.003 |
| 675.873 |       |       |        |       |       |        |       |       |        |       |
| 8       | 93.3  | 1.641 | 0.007  | 0.052 | 0.944 | 0.018  | 0.348 | 2.276 | 0.049  | 0.010 |
| 676.505 |       |       |        |       |       |        |       |       |        |       |
| 5       | 75    | 0.626 | -0.004 | 0.656 | 2.178 | -0.099 | 0.024 | 0.544 | -0.020 | 0.658 |
| 676.859 |       |       |        |       |       |        |       |       |        |       |
| 8       | 100.9 | 0.608 | -0.004 | 0.506 | 2.036 | -0.058 | 0.032 | 0.176 | -0.003 | 0.920 |
| 678.270 |       |       |        |       |       |        |       |       |        |       |
| 4       | 41.5  | 1.368 | -0.013 | 0.113 | 1.700 | -0.073 | 0.073 | 2.050 | -0.093 | 0.022 |
| 678.333 |       |       |        |       |       |        |       |       |        |       |
| 5       | 290.1 | 1.691 | -0.017 | 0.040 | 1.634 | -0.071 | 0.088 | 2.497 | -0.119 | 0.004 |

|         |       |       |        |       |       |        |       |       |        |       |
|---------|-------|-------|--------|-------|-------|--------|-------|-------|--------|-------|
| 679.805 |       |       |        |       |       |        |       |       |        |       |
| 5       | 42    | 1.488 | -0.007 | 0.111 | 1.039 | -0.021 | 0.361 | 2.393 | -0.059 | 0.009 |
| 680.302 |       |       |        |       |       |        |       |       |        |       |
| 6       | 49.2  | 1.639 | -0.016 | 0.046 | 1.960 | -0.084 | 0.034 | 2.768 | -0.126 | 0.002 |
| 681.133 |       |       |        |       |       |        |       |       |        |       |
| 7       | 42.4  | 1.585 | 0.015  | 0.094 | 1.838 | 0.083  | 0.060 | 2.558 | 0.121  | 0.006 |
| 681.969 | 45.2  | 2.082 | 0.008  | 0.029 | 1.207 | 0.015  | 0.408 | 1.772 | 0.030  | 0.107 |
| 683.301 | 40.7  | 1.817 | -0.019 | 0.025 | 1.776 | -0.079 | 0.061 | 2.320 | -0.112 | 0.008 |
| 683.881 |       |       |        |       |       |        |       |       |        |       |
| 3       | 45.2  | 1.699 | -0.009 | 0.045 | 0.928 | -0.017 | 0.417 | 2.226 | -0.052 | 0.014 |
| 683.972 |       |       |        |       |       |        |       |       |        |       |
| 4       | 46.6  | 2.090 | 0.008  | 0.030 | 1.386 | 0.022  | 0.236 | 1.495 | 0.022  | 0.250 |
| 684.275 |       |       |        |       |       |        |       |       |        |       |
| 6       | 40.7  | 2.508 | 0.023  | 0.004 | 1.309 | 0.051  | 0.200 | 0.778 | 0.032  | 0.429 |
| 687.637 |       |       |        |       |       |        |       |       |        |       |
| 3       | 40.8  | 1.557 | -0.008 | 0.056 | 1.064 | -0.024 | 0.251 | 2.112 | -0.050 | 0.017 |
| 689.862 |       |       |        |       |       |        |       |       |        |       |
| 2       | 103.1 | 1.442 | -0.008 | 0.083 | 1.997 | -0.049 | 0.034 | 2.079 | -0.054 | 0.021 |
| 690.312 |       |       |        |       |       |        |       |       |        |       |
| 1       | 40.7  | 1.113 | -0.012 | 0.178 | 1.739 | -0.080 | 0.063 | 2.306 | -0.114 | 0.008 |
| 691.391 | 103.6 | 1.553 | 0.017  | 0.069 | 1.729 | 0.084  | 0.067 | 2.400 | 0.122  | 0.008 |
| 692.195 |       |       |        |       |       |        |       |       |        |       |
| 1       | 73.8  | 2.569 | 0.011  | 0.002 | 2.451 | 0.044  | 0.010 | 2.000 | 0.037  | 0.031 |
| 695.479 | 43.7  | 1.704 | 0.013  | 0.062 | 2.148 | 0.074  | 0.024 | 0.960 | 0.022  | 0.507 |
| 699.897 |       |       |        |       |       |        |       |       |        |       |
| 1       | 95.5  | 1.635 | 0.017  | 0.055 | 1.555 | 0.070  | 0.102 | 2.324 | 0.110  | 0.010 |
| 702.151 |       |       |        |       |       |        |       |       |        |       |
| 1       | 41.2  | 1.444 | 0.014  | 0.109 | 1.442 | 0.063  | 0.156 | 2.035 | 0.097  | 0.028 |
| 702.217 |       |       |        |       |       |        |       |       |        |       |
| 3       | 58.2  | 2.322 | 0.013  | 0.006 | 1.486 | 0.037  | 0.116 | 2.077 | 0.054  | 0.023 |
| 708.167 |       |       |        |       |       |        |       |       |        |       |
| 2       | 66.8  | 1.580 | -0.013 | 0.054 | 1.739 | -0.061 | 0.062 | 2.253 | -0.084 | 0.010 |
| 709.158 |       |       |        |       |       |        |       |       |        |       |
| 8       | 41.8  | 1.650 | -0.007 | 0.120 | 0.771 | -0.004 | 0.857 | 2.125 | -0.051 | 0.029 |
| 710.848 |       |       |        |       |       |        |       |       |        |       |
| 2       | 101.2 | 0.477 | -0.003 | 0.574 | 2.414 | -0.063 | 0.010 | 0.387 | -0.011 | 0.662 |
| 712.581 |       |       |        |       |       |        |       |       |        |       |
| 2       | 68.4  | 1.909 | -0.019 | 0.023 | 1.402 | -0.057 | 0.165 | 2.795 | -0.130 | 0.002 |
| 712.993 |       |       |        |       |       |        |       |       |        |       |
| 2       | 45.2  | 2.302 | 0.009  | 0.013 | 1.301 | 0.019  | 0.275 | 1.793 | 0.028  | 0.117 |
| 714.444 |       |       |        |       |       |        |       |       |        |       |
| 3       | 74.4  | 1.035 | -0.009 | 0.269 | 0.284 | 0.011  | 0.782 | 2.613 | -0.112 | 0.004 |
| 715.827 | 38.2  | 1.778 | -0.017 | 0.034 | 2.259 | -0.096 | 0.015 | 1.410 | -0.063 | 0.112 |
| 717.159 |       |       |        |       |       |        |       |       |        |       |
| 1       | 40.4  | 1.435 | -0.015 | 0.086 | 1.627 | -0.072 | 0.086 | 2.097 | -0.100 | 0.017 |
| 721.901 |       |       |        |       |       |        |       |       |        |       |
| 3       | 41.1  | 1.276 | -0.013 | 0.120 | 2.105 | -0.093 | 0.022 | 1.421 | -0.066 | 0.107 |
| 722.998 | 41.2  | 1.719 | -0.015 | 0.056 | 1.031 | -0.026 | 0.514 | 2.218 | -0.095 | 0.016 |
| 723.856 | 102.3 | 1.433 | 0.009  | 0.107 | 2.389 | 0.068  | 0.010 | 1.014 | 0.030  | 0.262 |
| 725.528 | 46.7  | 1.862 | -0.019 | 0.026 | 1.860 | -0.086 | 0.045 | 2.256 | -0.110 | 0.011 |
| 727.572 |       |       |        |       |       |        |       |       |        |       |
| 2       | 53.6  | 1.330 | -0.012 | 0.113 | 2.677 | -0.110 | 0.004 | 1.083 | -0.046 | 0.237 |
| 728.892 |       |       |        |       |       |        |       |       |        |       |
| 3       | 87.7  | 1.198 | 0.012  | 0.153 | 1.914 | 0.086  | 0.038 | 2.171 | 0.101  | 0.014 |
| 729.588 | 54.4  | 1.009 | -0.007 | 0.306 | 2.142 | -0.073 | 0.028 | 0.869 | -0.030 | 0.379 |
| 729.913 |       |       |        |       |       |        |       |       |        |       |
| 5       | 39    | 0.662 | -0.005 | 0.422 | 0.296 | 0.002  | 0.955 | 2.001 | -0.073 | 0.023 |
| 730.535 |       |       |        |       |       |        |       |       |        |       |
| 4       | 52.3  | 1.433 | 0.010  | 0.102 | 2.575 | 0.087  | 0.005 | 1.801 | 0.063  | 0.046 |
| 731.302 |       |       |        |       |       |        |       |       |        |       |
| 9       | 40.7  | 1.528 | 0.014  | 0.062 | 2.051 | 0.081  | 0.026 | 1.932 | 0.081  | 0.028 |
| 731.539 |       |       |        |       |       |        |       |       |        |       |
| 1       | 50.9  | 1.384 | 0.010  | 0.120 | 2.401 | 0.085  | 0.010 | 1.649 | 0.060  | 0.071 |
| 733.336 |       |       |        |       |       |        |       |       |        |       |
| 2       | 100.9 | 1.575 | -0.011 | 0.056 | 0.817 | -0.025 | 0.380 | 2.233 | -0.073 | 0.011 |
| 738.458 |       |       |        |       |       |        |       |       |        |       |
| 1       | 75.6  | 2.316 | -0.015 | 0.006 | 1.630 | -0.047 | 0.080 | 2.486 | -0.076 | 0.005 |

|         |       |       |        |       |       |        |       |       |        |       |  |
|---------|-------|-------|--------|-------|-------|--------|-------|-------|--------|-------|--|
| 744.390 |       |       |        |       |       |        |       |       |        |       |  |
| 4       | 66.6  | 2.700 | 0.020  | 0.001 | 2.210 | 0.073  | 0.017 | 1.618 | 0.057  | 0.066 |  |
| 753.012 |       |       |        |       |       |        |       |       |        |       |  |
| 8       | 51    | 1.657 | 0.014  | 0.079 | 1.659 | 0.063  | 0.098 | 2.299 | 0.095  | 0.013 |  |
| 754.534 |       |       |        |       |       |        |       |       |        |       |  |
| 1       | 50.9  | 0.899 | 0.008  | 0.279 | 2.021 | 0.077  | 0.030 | 0.629 | 0.025  | 0.480 |  |
| 756.552 | 52.2  | 1.801 | 0.012  | 0.039 | 2.254 | 0.066  | 0.015 | 1.566 | 0.047  | 0.089 |  |
| 757.553 |       |       |        |       |       |        |       |       |        |       |  |
| 5       | 50.1  | 1.728 | 0.011  | 0.052 | 2.285 | 0.067  | 0.014 | 1.691 | 0.051  | 0.068 |  |
| 760.181 |       |       |        |       |       |        |       |       |        |       |  |
| 8       | 71.3  | 2.460 | 0.023  | 0.003 | 2.658 | 0.109  | 0.004 | 2.616 | 0.114  | 0.003 |  |
| 760.362 |       |       |        |       |       |        |       |       |        |       |  |
| 8       | 61.7  | 2.771 | 0.027  | 0.001 | 0.543 | 0.023  | 0.588 | 1.976 | 0.093  | 0.027 |  |
| 760.949 |       |       |        |       |       |        |       |       |        |       |  |
| 3       | 93.1  | 2.182 | -0.009 | 0.014 | 1.775 | -0.033 | 0.060 | 1.994 | -0.038 | 0.029 |  |
| 763.591 |       |       |        |       |       |        |       |       |        |       |  |
| 2       | 50.4  | 2.033 | -0.016 | 0.014 | 1.425 | -0.046 | 0.146 | 2.074 | -0.076 | 0.018 |  |
| 765.381 |       |       |        |       |       |        |       |       |        |       |  |
| 9       | 101.6 | 2.443 | 0.022  | 0.003 | 0.455 | 0.017  | 0.635 | 3.146 | 0.128  | 0.000 |  |
| 777.984 |       |       |        |       |       |        |       |       |        |       |  |
| 1       | 63.7  | 2.181 | 0.016  | 0.008 | 1.704 | 0.056  | 0.067 | 1.889 | 0.065  | 0.033 |  |
| 778.536 |       |       |        |       |       |        |       |       |        |       |  |
| 1       | 49.5  | 1.706 | 0.014  | 0.036 | 3.048 | 0.105  | 0.001 | 1.100 | 0.040  | 0.213 |  |
| 780.549 |       |       |        |       |       |        |       |       |        |       |  |
| 4       | 57    | 1.460 | 0.011  | 0.079 | 2.169 | 0.071  | 0.020 | 0.860 | 0.030  | 0.338 |  |
| 781.553 |       |       |        |       |       |        |       |       |        |       |  |
| 1       | 52.9  | 1.408 | 0.011  | 0.091 | 2.157 | 0.072  | 0.021 | 0.774 | 0.027  | 0.393 |  |
| 782.971 |       |       |        |       |       |        |       |       |        |       |  |
| 8       | 50.1  | 1.958 | 0.016  | 0.020 | 2.315 | 0.081  | 0.013 | 1.229 | 0.046  | 0.167 |  |
| 787.872 |       |       |        |       |       |        |       |       |        |       |  |
| 8       | 97.7  | 1.128 | 0.008  | 0.188 | 2.309 | 0.074  | 0.012 | 0.686 | 0.019  | 0.535 |  |
| 792.423 |       |       |        |       |       |        |       |       |        |       |  |
| 3       | 77.9  | 2.307 | -0.023 | 0.006 | 1.514 | -0.069 | 0.101 | 1.120 | -0.053 | 0.206 |  |
| 793.371 |       |       |        |       |       |        |       |       |        |       |  |
| 8       | 103.4 | 2.608 | 0.024  | 0.001 | 1.866 | 0.074  | 0.043 | 2.275 | 0.096  | 0.009 |  |
| 793.509 |       |       |        |       |       |        |       |       |        |       |  |
| 1       | 62.9  | 2.149 | 0.020  | 0.013 | 2.362 | 0.098  | 0.013 | 1.648 | 0.072  | 0.071 |  |
| 801.877 |       |       |        |       |       |        |       |       |        |       |  |
| 9       | 95.4  | 2.497 | 0.020  | 0.003 | 0.540 | 0.012  | 0.709 | 2.145 | 0.079  | 0.015 |  |
| 803.027 |       |       |        |       |       |        |       |       |        |       |  |
| 9       | 87.2  | 2.118 | 0.015  | 0.009 | 1.725 | 0.053  | 0.062 | 1.504 | 0.049  | 0.089 |  |
| 810.439 |       |       |        |       |       |        |       |       |        |       |  |
| 3       | 75.3  | 1.701 | -0.008 | 0.057 | 1.321 | -0.028 | 0.206 | 2.301 | -0.055 | 0.012 |  |
| 812.390 |       |       |        |       |       |        |       |       |        |       |  |
| 7       | 75.2  | 2.198 | 0.023  | 0.008 | 0.944 | 0.044  | 0.312 | 1.719 | 0.085  | 0.051 |  |
| 812.827 |       |       |        |       |       |        |       |       |        |       |  |
| 4       | 98.7  | 1.909 | -0.014 | 0.020 | 2.056 | -0.063 | 0.027 | 0.820 | -0.024 | 0.405 |  |
| 814.890 |       |       |        |       |       |        |       |       |        |       |  |
| 9       | 99.2  | 1.529 | -0.013 | 0.069 | 2.348 | -0.087 | 0.015 | 1.749 | -0.070 | 0.052 |  |
| 827.366 |       |       |        |       |       |        |       |       |        |       |  |
| 4       | 103.6 | 0.661 | 0.006  | 0.471 | 2.100 | 0.086  | 0.022 | 0.838 | 0.035  | 0.364 |  |
| 828.899 |       |       |        |       |       |        |       |       |        |       |  |
| 5       | 106.1 | 1.082 | -0.008 | 0.251 | 0.688 | -0.024 | 0.491 | 2.173 | -0.085 | 0.016 |  |
| 832.863 |       |       |        |       |       |        |       |       |        |       |  |
| 2       | 96    | 0.856 | -0.007 | 0.416 | 2.089 | -0.084 | 0.033 | 1.255 | -0.054 | 0.177 |  |
| 837.876 |       |       |        |       |       |        |       |       |        |       |  |
| 1       | 97.4  | 0.545 | -0.003 | 0.661 | 0.313 | 0.009  | 0.778 | 2.619 | -0.092 | 0.004 |  |
| 841.366 |       |       |        |       |       |        |       |       |        |       |  |
| 8       | 105.8 | 1.281 | 0.012  | 0.135 | 2.103 | 0.086  | 0.023 | 0.355 | 0.014  | 0.715 |  |
| 843.901 | 106.1 | 1.107 | 0.011  | 0.181 | 2.819 | 0.118  | 0.002 | 0.299 | 0.009  | 0.828 |  |
| 846.827 |       |       |        |       |       |        |       |       |        |       |  |
| 8       | 30.7  | 1.583 | -0.015 | 0.067 | 1.823 | -0.079 | 0.056 | 2.282 | -0.105 | 0.011 |  |
| 852.968 |       |       |        |       |       |        |       |       |        |       |  |
| 4       | 89.9  | 2.240 | -0.022 | 0.006 | 1.447 | -0.059 | 0.138 | 1.187 | -0.054 | 0.181 |  |
| 853.579 |       |       |        |       |       |        |       |       |        |       |  |
| 7       | 71.3  | 1.942 | -0.019 | 0.017 | 2.108 | -0.089 | 0.024 | 2.069 | -0.094 | 0.018 |  |

|         |       |       |        |       |       |        |       |       |        |       |  |
|---------|-------|-------|--------|-------|-------|--------|-------|-------|--------|-------|--|
| 855.341 |       |       |        |       |       |        |       |       |        |       |  |
| 4       | 103.1 | 2.002 | 0.016  | 0.017 | 0.538 | 0.018  | 0.592 | 1.999 | 0.075  | 0.024 |  |
| 858.605 |       |       |        |       |       |        |       |       |        |       |  |
| 5       | 67.1  | 2.302 | 0.019  | 0.005 | 2.097 | 0.075  | 0.025 | 0.780 | 0.028  | 0.409 |  |
| 861.383 |       |       |        |       |       |        |       |       |        |       |  |
| 6       | 85.6  | 0.935 | 0.007  | 0.348 | 0.633 | 0.024  | 0.501 | 2.004 | 0.078  | 0.029 |  |
| 866.824 |       |       |        |       |       |        |       |       |        |       |  |
| 9       | 81.7  | 2.278 | 0.025  | 0.005 | 0.934 | 0.042  | 0.340 | 2.567 | 0.130  | 0.003 |  |
| 888.454 |       |       |        |       |       |        |       |       |        |       |  |
| 9       | 74.4  | 1.596 | 0.017  | 0.052 | 2.207 | 0.100  | 0.017 | 0.561 | -0.003 | 0.953 |  |
| 890.541 | 76.8  | 1.111 | 0.009  | 0.272 | 2.160 | 0.086  | 0.026 | 0.738 | 0.010  | 0.800 |  |
| 896.487 | 74.1  | 2.131 | -0.017 | 0.020 | 0.648 | -0.021 | 0.559 | 1.989 | -0.075 | 0.034 |  |
| 900.850 |       |       |        |       |       |        |       |       |        |       |  |
| 3       | 96.1  | 0.970 | -0.009 | 0.261 | 0.377 | -0.013 | 0.729 | 2.049 | -0.087 | 0.021 |  |
| 909.601 |       |       |        |       |       |        |       |       |        |       |  |
| 2       | 62.9  | 1.468 | 0.010  | 0.091 | 0.737 | 0.021  | 0.452 | 2.016 | 0.064  | 0.023 |  |
| 912.120 |       |       |        |       |       |        |       |       |        |       |  |
| 6       | 62.8  | 1.788 | -0.013 | 0.032 | 2.257 | -0.072 | 0.015 | 1.857 | -0.062 | 0.037 |  |
| 918.750 |       |       |        |       |       |        |       |       |        |       |  |
| 2       | 90.1  | 2.706 | -0.026 | 0.001 | 2.289 | -0.096 | 0.014 | 2.985 | -0.133 | 0.001 |  |
| 942.865 |       |       |        |       |       |        |       |       |        |       |  |
| 3       | 96.8  | 1.304 | -0.011 | 0.137 | 2.715 | -0.107 | 0.003 | 0.635 | -0.025 | 0.499 |  |
| 945.650 |       |       |        |       |       |        |       |       |        |       |  |
| 1       | 54.5  | 1.301 | -0.015 | 0.112 | 2.189 | -0.110 | 0.019 | 1.096 | -0.059 | 0.217 |  |
| 947.823 |       |       |        |       |       |        |       |       |        |       |  |
| 1       | 101.4 | 1.595 | -0.009 | 0.055 | 1.845 | -0.045 | 0.053 | 2.163 | -0.057 | 0.015 |  |
| 948.804 | 100.9 | 1.630 | -0.010 | 0.067 | 3.190 | -0.085 | 0.001 | 1.007 | -0.028 | 0.274 |  |
| 949.864 | 102.1 | 2.157 | 0.011  | 0.008 | 0.694 | 0.011  | 0.583 | 2.948 | 0.070  | 0.001 |  |
| 950.627 |       |       |        |       |       |        |       |       |        |       |  |
| 1       | 50.9  | 1.441 | -0.013 | 0.081 | 1.687 | -0.065 | 0.068 | 2.377 | -0.097 | 0.007 |  |
| 952.320 |       |       |        |       |       |        |       |       |        |       |  |
| 1       | 77.7  | 2.093 | -0.010 | 0.030 | 1.497 | -0.033 | 0.139 | 1.435 | -0.030 | 0.177 |  |
| 959.767 |       |       |        |       |       |        |       |       |        |       |  |
| 9       | 100.5 | 1.784 | -0.016 | 0.053 | 1.953 | -0.077 | 0.064 | 2.058 | -0.094 | 0.026 |  |
| 961.329 |       |       |        |       |       |        |       |       |        |       |  |
| 6       | 77    | 2.047 | 0.018  | 0.015 | 1.533 | 0.056  | 0.119 | 1.675 | 0.067  | 0.062 |  |
| 961.810 |       |       |        |       |       |        |       |       |        |       |  |
| 8       | 102.6 | 1.122 | -0.006 | 0.288 | 0.351 | 0.006  | 0.837 | 2.315 | -0.070 | 0.015 |  |
| 971.296 |       |       |        |       |       |        |       |       |        |       |  |
| 6       | 100.9 | 1.953 | -0.017 | 0.029 | 0.489 | -0.014 | 0.705 | 2.976 | -0.123 | 0.001 |  |
| 974.375 |       |       |        |       |       |        |       |       |        |       |  |
| 2       | 77.4  | 0.747 | -0.002 | 0.509 | 2.024 | -0.034 | 0.053 | 0.297 | -0.002 | 0.930 |  |
| 975.812 |       |       |        |       |       |        |       |       |        |       |  |
| 7       | 99.6  | 1.410 | 0.008  | 0.100 | 1.316 | 0.033  | 0.174 | 2.103 | 0.058  | 0.018 |  |
| 977.652 |       |       |        |       |       |        |       |       |        |       |  |
| 9       | 59.7  | 2.693 | 0.010  | 0.002 | 2.210 | 0.035  | 0.030 | 2.342 | 0.038  | 0.020 |  |
| 978.656 |       |       |        |       |       |        |       |       |        |       |  |
| 3       | 59.8  | 2.136 | 0.010  | 0.015 | 1.809 | 0.033  | 0.103 | 2.070 | 0.041  | 0.043 |  |
| 980.366 |       |       |        |       |       |        |       |       |        |       |  |
| 6       | 76.9  | 2.412 | -0.014 | 0.004 | 1.895 | -0.043 | 0.079 | 1.521 | -0.041 | 0.097 |  |
| 987.637 |       |       |        |       |       |        |       |       |        |       |  |
| 2       | 60.4  | 2.080 | 0.017  | 0.013 | 1.602 | 0.058  | 0.092 | 2.101 | 0.080  | 0.020 |  |
| 991.111 |       |       |        |       |       |        |       |       |        |       |  |
| 1       | 88.2  | 0.507 | 0.003  | 0.587 | 2.551 | 0.081  | 0.006 | 1.266 | 0.042  | 0.167 |  |
| 991.668 |       |       |        |       |       |        |       |       |        |       |  |
| 3       | 60.2  | 2.343 | 0.008  | 0.011 | 1.842 | 0.026  | 0.098 | 2.098 | 0.031  | 0.049 |  |
| 992.671 |       |       |        |       |       |        |       |       |        |       |  |
| 8       | 59.8  | 2.343 | 0.008  | 0.011 | 1.841 | 0.026  | 0.096 | 2.091 | 0.031  | 0.050 |  |
| 993.674 |       |       |        |       |       |        |       |       |        |       |  |
| 9       | 59.9  | 2.308 | 0.008  | 0.013 | 1.815 | 0.025  | 0.103 | 2.078 | 0.030  | 0.052 |  |
| 994.343 |       |       |        |       |       |        |       |       |        |       |  |
| 5       | 75.2  | 1.390 | -0.013 | 0.112 | 1.026 | -0.042 | 0.306 | 2.337 | -0.109 | 0.008 |  |
| 994.677 |       |       |        |       |       |        |       |       |        |       |  |
| 7       | 60.2  | 2.359 | 0.008  | 0.009 | 1.785 | 0.025  | 0.102 | 2.173 | 0.032  | 0.036 |  |
| 995.681 | 60    | 1.906 | 0.011  | 0.038 | 2.053 | 0.052  | 0.040 | 1.506 | 0.031  | 0.224 |  |
| 996.834 |       |       |        |       |       |        |       |       |        |       |  |
| 4       | 103.2 | 1.113 | -0.008 | 0.223 | 2.045 | -0.069 | 0.031 | 1.475 | -0.053 | 0.105 |  |



|         |       |       |        |       |       |        |       |       |        |       |
|---------|-------|-------|--------|-------|-------|--------|-------|-------|--------|-------|
| 1005.68 |       |       |        |       |       |        |       |       |        |       |
| 44      | 59.5  | 2.162 | 0.007  | 0.024 | 1.253 | 0.012  | 0.403 | 1.933 | 0.025  | 0.095 |
| 1006.68 |       |       |        |       |       |        |       |       |        |       |
| 78      | 59.6  | 2.068 | 0.007  | 0.041 | 1.293 | 0.013  | 0.415 | 1.946 | 0.026  | 0.108 |
| 1007.84 |       |       |        |       |       |        |       |       |        |       |
| 52      | 97.3  | 1.490 | -0.010 | 0.147 | 1.677 | -0.053 | 0.098 | 2.198 | -0.074 | 0.023 |
| 1010.28 | 77    | 2.149 | 0.018  | 0.016 | 2.657 | 0.099  | 0.007 | 2.790 | 0.112  | 0.002 |
| 1013.65 |       |       |        |       |       |        |       |       |        |       |
| 23      | 61.8  | 2.316 | 0.010  | 0.010 | 1.899 | 0.036  | 0.055 | 2.232 | 0.043  | 0.023 |
| 1014.15 |       |       |        |       |       |        |       |       |        |       |
| 27      | 63.3  | 1.301 | -0.010 | 0.136 | 0.570 | 0.020  | 0.543 | 2.257 | -0.080 | 0.013 |
| 1014.65 |       |       |        |       |       |        |       |       |        |       |
| 6       | 61.8  | 2.261 | 0.011  | 0.012 | 1.745 | 0.036  | 0.089 | 2.151 | 0.047  | 0.027 |
| 1015.66 |       |       |        |       |       |        |       |       |        |       |
| 9       | 60    | 2.073 | 0.011  | 0.018 | 1.499 | 0.035  | 0.115 | 2.372 | 0.059  | 0.009 |
| 1016.67 |       |       |        |       |       |        |       |       |        |       |
| 22      | 60    | 2.083 | 0.011  | 0.017 | 1.521 | 0.036  | 0.110 | 2.370 | 0.058  | 0.009 |
| 1017.85 |       |       |        |       |       |        |       |       |        |       |
| 29      | 102.8 | 2.455 | 0.018  | 0.003 | 2.281 | 0.073  | 0.013 | 1.312 | 0.044  | 0.143 |
| 1019.70 |       |       |        |       |       |        |       |       |        |       |
| 02      | 59.3  | 2.549 | 0.008  | 0.005 | 1.755 | 0.020  | 0.160 | 2.414 | 0.033  | 0.023 |
| 1020.70 |       |       |        |       |       |        |       |       |        |       |
| 38      | 59.7  | 2.574 | 0.008  | 0.005 | 1.801 | 0.022  | 0.141 | 2.419 | 0.034  | 0.022 |
| 1021.70 |       |       |        |       |       |        |       |       |        |       |
| 68      | 59.2  | 2.449 | 0.008  | 0.009 | 1.737 | 0.020  | 0.173 | 2.346 | 0.031  | 0.031 |
| 1022.70 |       |       |        |       |       |        |       |       |        |       |
| 97      | 59.6  | 2.078 | 0.008  | 0.030 | 1.448 | 0.018  | 0.317 | 2.019 | 0.035  | 0.062 |
| 1024.48 |       |       |        |       |       |        |       |       |        |       |
| 57      | 79.7  | 2.155 | -0.012 | 0.009 | 1.231 | -0.030 | 0.199 | 2.219 | -0.059 | 0.012 |
| 1029.62 |       |       |        |       |       |        |       |       |        |       |
| 53      | 64.8  | 1.648 | 0.011  | 0.077 | 2.361 | 0.075  | 0.016 | 1.166 | 0.029  | 0.366 |
| 1030.63 |       |       |        |       |       |        |       |       |        |       |
| 09      | 65    | 2.016 | 0.017  | 0.017 | 1.885 | 0.067  | 0.059 | 2.038 | 0.079  | 0.027 |
| 1037.65 |       |       |        |       |       |        |       |       |        |       |
| 36      | 61.1  | 2.205 | 0.013  | 0.011 | 1.604 | 0.040  | 0.115 | 1.820 | 0.047  | 0.066 |
| 1038.51 |       |       |        |       |       |        |       |       |        |       |
| 27      | 79.5  | 2.031 | 0.022  | 0.015 | 1.248 | 0.057  | 0.194 | 1.319 | 0.064  | 0.146 |
| 1038.65 |       |       |        |       |       |        |       |       |        |       |
| 7       | 61.5  | 2.079 | 0.015  | 0.015 | 1.318 | 0.039  | 0.196 | 1.737 | 0.056  | 0.068 |
| 1040.67 |       |       |        |       |       |        |       |       |        |       |
| 27      | 59.6  | 2.038 | 0.009  | 0.027 | 1.200 | 0.023  | 0.270 | 1.909 | 0.040  | 0.055 |
| 1043.70 |       |       |        |       |       |        |       |       |        |       |
| 03      | 59.5  | 1.779 | 0.008  | 0.047 | 0.695 | 0.012  | 0.544 | 2.081 | 0.046  | 0.024 |
| 1047.73 |       |       |        |       |       |        |       |       |        |       |
| 15      | 58.7  | 2.061 | 0.008  | 0.025 | 1.260 | 0.014  | 0.407 | 2.057 | 0.033  | 0.054 |
| 1048.73 |       |       |        |       |       |        |       |       |        |       |
| 54      | 59.1  | 1.981 | 0.007  | 0.035 | 1.300 | 0.014  | 0.405 | 2.026 | 0.033  | 0.059 |
| 1054.3  | 69.4  | 0.338 | 0.001  | 0.858 | 2.095 | 0.081  | 0.023 | 1.210 | 0.049  | 0.171 |
| 1059.30 |       |       |        |       |       |        |       |       |        |       |
| 68      | 103.3 | 1.235 | 0.010  | 0.157 | 2.555 | 0.094  | 0.007 | 1.654 | 0.064  | 0.072 |
| 1063.66 |       |       |        |       |       |        |       |       |        |       |
| 99      | 58.9  | 2.008 | 0.011  | 0.024 | 1.316 | 0.032  | 0.177 | 1.738 | 0.042  | 0.077 |
| 1069.71 |       |       |        |       |       |        |       |       |        |       |
| 21      | 59    | 2.190 | 0.011  | 0.021 | 1.459 | 0.029  | 0.206 | 2.150 | 0.047  | 0.042 |
| 1074.30 |       |       |        |       |       |        |       |       |        |       |
| 6       | 48.6  | 1.200 | -0.007 | 0.258 | 1.254 | -0.036 | 0.238 | 2.263 | -0.071 | 0.019 |
| 1080.41 |       |       |        |       |       |        |       |       |        |       |
| 77      | 79.4  | 1.799 | 0.012  | 0.032 | 2.608 | 0.076  | 0.005 | 0.867 | 0.024  | 0.382 |
| 1088.79 |       |       |        |       |       |        |       |       |        |       |
| 33      | 102.3 | 0.946 | 0.007  | 0.265 | 0.309 | 0.006  | 0.845 | 2.020 | 0.070  | 0.024 |
| 1090.44 |       |       |        |       |       |        |       |       |        |       |
| 6       | 79.5  | 1.689 | -0.017 | 0.039 | 2.143 | -0.093 | 0.021 | 1.484 | -0.068 | 0.097 |
| 1091.69 |       |       |        |       |       |        |       |       |        |       |
| 98      | 58.8  | 1.700 | 0.009  | 0.069 | 2.140 | 0.056  | 0.021 | 0.874 | 0.004  | 0.880 |
| 1093.29 |       |       |        |       |       |        |       |       |        |       |
| 99      | 103.5 | 1.443 | 0.013  | 0.095 | 1.574 | 0.066  | 0.090 | 2.236 | 0.098  | 0.013 |

|         |       |       |        |       |       |        |       |       |        |       |  |
|---------|-------|-------|--------|-------|-------|--------|-------|-------|--------|-------|--|
| 1094.28 |       |       |        |       |       |        |       |       |        |       |  |
| 82      | 78    | 1.802 | -0.010 | 0.039 | 2.357 | -0.060 | 0.013 | 1.445 | -0.038 | 0.118 |  |
| 1096.28 |       |       |        |       |       |        |       |       |        |       |  |
| 41      | 76.6  | 1.199 | -0.006 | 0.215 | 2.025 | -0.052 | 0.040 | 0.869 | -0.022 | 0.391 |  |
| 1102.23 |       |       |        |       |       |        |       |       |        |       |  |
| 1       | 75.6  | 2.142 | 0.019  | 0.009 | 0.465 | 0.004  | 0.910 | 1.336 | 0.055  | 0.133 |  |
| 1110.26 |       |       |        |       |       |        |       |       |        |       |  |
| 31      | 75.5  | 1.548 | 0.016  | 0.059 | 0.752 | 0.031  | 0.447 | 2.142 | 0.100  | 0.015 |  |
| 1111.12 |       |       |        |       |       |        |       |       |        |       |  |
| 1       | 102.3 | 2.226 | 0.024  | 0.006 | 2.051 | 0.097  | 0.027 | 2.167 | 0.108  | 0.014 |  |
| 1142.21 |       |       |        |       |       |        |       |       |        |       |  |
| 81      | 76.9  | 1.868 | -0.010 | 0.045 | 2.039 | -0.050 | 0.044 | 0.969 | -0.021 | 0.402 |  |
| 1144.21 |       |       |        |       |       |        |       |       |        |       |  |
| 53      | 76.9  | 2.089 | -0.011 | 0.023 | 2.535 | -0.062 | 0.010 | 0.789 | -0.009 | 0.699 |  |
| 1148.16 |       |       |        |       |       |        |       |       |        |       |  |
| 54      | 75.9  | 1.176 | 0.009  | 0.218 | 2.214 | 0.085  | 0.023 | 0.440 | 0.014  | 0.709 |  |
| 1148.32 |       |       |        |       |       |        |       |       |        |       |  |
| 56      | 47.1  | 0.958 | -0.007 | 0.320 | 0.599 | -0.017 | 0.613 | 2.097 | -0.073 | 0.027 |  |
| 1152.24 |       |       |        |       |       |        |       |       |        |       |  |
| 75      | 76.6  | 1.565 | -0.010 | 0.086 | 2.299 | -0.067 | 0.018 | 0.959 | -0.027 | 0.346 |  |
| 1153.43 |       |       |        |       |       |        |       |       |        |       |  |
| 69      | 102.2 | 2.301 | 0.018  | 0.008 | 1.996 | 0.072  | 0.033 | 2.079 | 0.077  | 0.024 |  |
| 1156.11 |       |       |        |       |       |        |       |       |        |       |  |
| 35      | 102.7 | 1.713 | -0.017 | 0.037 | 0.726 | -0.031 | 0.442 | 2.091 | -0.095 | 0.018 |  |
| 1156.24 |       |       |        |       |       |        |       |       |        |       |  |
| 25      | 76.5  | 2.216 | 0.022  | 0.007 | 2.493 | 0.103  | 0.010 | 1.648 | 0.073  | 0.072 |  |
| 1166.82 |       |       |        |       |       |        |       |       |        |       |  |
| 64      | 97.3  | 2.016 | -0.020 | 0.014 | 1.331 | -0.057 | 0.150 | 2.160 | -0.097 | 0.014 |  |
| 1176.78 |       |       |        |       |       |        |       |       |        |       |  |
| 01      | 42.7  | 1.320 | 0.010  | 0.113 | 0.927 | 0.031  | 0.334 | 2.135 | 0.078  | 0.015 |  |
| 1179.27 |       |       |        |       |       |        |       |       |        |       |  |
| 61      | 101.2 | 0.126 | 0.000  | 0.963 | 2.135 | -0.051 | 0.021 | 0.255 | 0.006  | 0.799 |  |
| 1188.15 |       |       |        |       |       |        |       |       |        |       |  |
| 34      | 76.8  | 2.157 | 0.020  | 0.010 | 1.401 | 0.053  | 0.164 | 2.428 | 0.104  | 0.006 |  |
| 1196.33 |       |       |        |       |       |        |       |       |        |       |  |
| 77      | 79.1  | 2.331 | 0.026  | 0.004 | 4.418 | 0.211  | 0.000 | 0.716 | 0.033  | 0.460 |  |
| 1196.77 |       |       |        |       |       |        |       |       |        |       |  |
| 44      | 47.5  | 1.938 | 0.016  | 0.020 | 2.196 | 0.079  | 0.017 | 1.536 | 0.059  | 0.082 |  |
| 1196.89 |       |       |        |       |       |        |       |       |        |       |  |
| 13      | 59.2  | 0.836 | 0.006  | 0.478 | 0.705 | 0.019  | 0.650 | 2.008 | 0.094  | 0.024 |  |
| 1198.18 |       |       |        |       |       |        |       |       |        |       |  |
| 27      | 76.9  | 1.904 | 0.017  | 0.026 | 2.400 | 0.099  | 0.010 | 1.343 | 0.056  | 0.152 |  |
| 1202.74 |       |       |        |       |       |        |       |       |        |       |  |
| 15      | 100.5 | 1.918 | 0.018  | 0.022 | 2.203 | 0.092  | 0.018 | 1.783 | 0.079  | 0.045 |  |
| 1210.83 |       |       |        |       |       |        |       |       |        |       |  |
| 24      | 42.2  | 2.147 | 0.020  | 0.009 | 1.130 | 0.044  | 0.255 | 1.939 | 0.084  | 0.030 |  |
| 1213.27 |       |       |        |       |       |        |       |       |        |       |  |
| 3       | 101.9 | 0.918 | 0.005  | 0.301 | 2.506 | 0.058  | 0.007 | 1.188 | 0.029  | 0.189 |  |
| 1220.23 |       |       |        |       |       |        |       |       |        |       |  |
| 53      | 76.4  | 2.157 | 0.020  | 0.008 | 2.796 | 0.110  | 0.002 | 1.791 | 0.074  | 0.042 |  |
| 1242.74 |       |       |        |       |       |        |       |       |        |       |  |
| 84      | 101.3 | 0.210 | 0.001  | 0.908 | 2.130 | 0.093  | 0.021 | 0.768 | -0.029 | 0.470 |  |
| 1251.88 |       |       |        |       |       |        |       |       |        |       |  |
| 58      | 57.7  | 1.825 | 0.010  | 0.030 | 1.798 | 0.044  | 0.066 | 2.118 | 0.057  | 0.017 |  |
| 1252.89 |       |       |        |       |       |        |       |       |        |       |  |
| 03      | 57.8  | 1.757 | 0.012  | 0.039 | 2.491 | 0.077  | 0.007 | 1.532 | 0.048  | 0.102 |  |
| 1253.9  |       |       |        |       |       |        |       |       |        |       |  |
| 57.3    | 57.3  | 2.052 | 0.012  | 0.015 | 2.505 | 0.064  | 0.009 | 1.877 | 0.051  | 0.038 |  |
| 1254.90 |       |       |        |       |       |        |       |       |        |       |  |
| 32      | 57.8  | 2.086 | 0.013  | 0.013 | 2.491 | 0.064  | 0.009 | 1.870 | 0.052  | 0.039 |  |

Table S3. Significant C18neg features

| mz      | time<br>(s) | vip_O<br>P | coef_O<br>P | pvalue_<br>OP | vip_PY<br>R | coef_PY<br>R | pvalue_P<br>YR | vip_O<br>C | coef_O<br>C | pvalue_O<br>C |
|---------|-------------|------------|-------------|---------------|-------------|--------------|----------------|------------|-------------|---------------|
| 86.6701 | 246.9       | 1.504      | 0.012       | 0.097         | 2.610       | 0.099        | 0.006          | 0.927      | 0.037       | 0.319         |
| 87.0087 | 38.6        | 2.024      | 0.019       | 0.032         | 1.539       | 0.064        | 0.131          | 1.674      | 0.065       | 0.133         |
| 88.0404 | 47          | 2.466      | 0.018       | 0.004         | 2.904       | 0.096        | 0.002          | 2.473      | 0.082       | 0.010         |
| 89.0089 | 45.7        | 2.030      | 0.019       | 0.025         | 1.505       | 0.064        | 0.131          | 2.389      | 0.103       | 0.016         |
| 89.0192 | 37          | 1.840      | 0.018       | 0.038         | 1.360       | 0.059        | 0.172          | 2.187      | 0.097       | 0.026         |
| 89.0244 | 41.1        | 1.951      | 0.018       | 0.035         | 1.504       | 0.062        | 0.134          | 2.356      | 0.098       | 0.019         |
| 89.0297 | 37.5        | 1.947      | 0.020       | 0.027         | 1.493       | 0.066        | 0.129          | 2.235      | 0.100       | 0.022         |
| 89.04   | 44.3        | 2.004      | 0.019       | 0.030         | 1.428       | 0.059        | 0.162          | 2.408      | 0.102       | 0.016         |
| 90.0277 | 41.3        | 2.092      | 0.019       | 0.021         | 1.539       | 0.063        | 0.128          | 2.519      | 0.106       | 0.011         |
| 91.0286 | 39.7        | 2.427      | 0.023       | 0.005         | 1.839       | 0.077        | 0.059          | 2.520      | 0.107       | 0.009         |
| 98.949  | 165.1       | 1.904      | 0.015       | 0.031         | 1.246       | 0.045        | 0.195          | 2.074      | 0.078       | 0.026         |
| 100.985 |             |            |             |               |             |              |                |            |             |               |
| 6       | 59.3        | 1.561      | -0.009      | 0.107         | 2.057       | -0.055       | 0.037          | 1.746      | -0.048      | 0.073         |
| 103.003 |             |            |             |               |             |              |                |            |             |               |
| 7       | 128.1       | 1.917      | -0.016      | 0.024         | 1.415       | -0.053       | 0.134          | 2.657      | -0.104      | 0.004         |
| 104.043 |             |            |             |               |             |              |                |            |             |               |
| 4       | 37.1        | 1.199      | -0.012      | 0.187         | 2.311       | -0.103       | 0.016          | 1.366      | -0.061      | 0.161         |
| 108.453 |             |            |             |               |             |              |                |            |             |               |
| 7       | 263.7       | 0.979      | 0.006       | 0.273         | 2.056       | 0.055        | 0.029          | 0.754      | 0.018       | 0.478         |
| 109.040 |             |            |             |               |             |              |                |            |             |               |
| 7       | 56.1        | 1.616      | 0.012       | 0.065         | 1.217       | 0.042        | 0.198          | 2.534      | 0.090       | 0.006         |
| 114.027 |             |            |             |               |             |              |                |            |             |               |
| 8       | 48.1        | 0.647      | 0.005       | 0.457         | 0.238       | 0.008        | 0.831          | 2.237      | 0.087       | 0.015         |
| 118.930 |             |            |             |               |             |              |                |            |             |               |
| 9       | 60.3        | 1.402      | -0.010      | 0.100         | 0.913       | -0.028       | 0.353          | 2.865      | -0.093      | 0.002         |
| 121.533 |             |            |             |               |             |              |                |            |             |               |
| 8       | 278.7       | 1.954      | -0.018      | 0.024         | 2.685       | -0.109       | 0.004          | 1.603      | -0.067      | 0.085         |
| 122.946 |             |            |             |               |             |              |                |            |             |               |
| 7       | 23.5        | 1.729      | -0.007      | 0.055         | 0.582       | -0.012       | 0.541          | 2.872      | -0.058      | 0.002         |
| 123.975 |             |            |             |               |             |              |                |            |             |               |
| 1       | 20.6        | 1.563      | 0.011       | 0.079         | 0.610       | 0.020        | 0.529          | 2.018      | 0.069       | 0.030         |
| 125.001 |             |            |             |               |             |              |                |            |             |               |
| 1       | 41.6        | 1.884      | 0.015       | 0.046         | 1.389       | 0.050        | 0.167          | 2.379      | 0.087       | 0.016         |
| 126.998 |             |            |             |               |             |              |                |            |             |               |
| 2       | 42          | 2.015      | 0.016       | 0.026         | 1.525       | 0.057        | 0.121          | 2.450      | 0.092       | 0.012         |
| 129.005 |             |            |             |               |             |              |                |            |             |               |
| 6       | 63.6        | 0.937      | -0.003      | 0.308         | 2.852       | -0.042       | 0.002          | 1.438      | -0.021      | 0.134         |
| 132.982 |             |            |             |               |             |              |                |            |             |               |
| 7       | 32.8        | 0.146      | 0.001       | 0.909         | 2.195       | 0.050        | 0.024          | 1.167      | -0.028      | 0.209         |
| 135.971 |             |            |             |               |             |              |                |            |             |               |
| 7       | 24.8        | 1.510      | 0.015       | 0.086         | 2.377       | 0.104        | 0.012          | 0.477      | 0.021       | 0.618         |
| 136.977 |             |            |             |               |             |              |                |            |             |               |
| 4       | 128         | 1.844      | 0.011       | 0.034         | 1.025       | 0.027        | 0.292          | 2.124      | 0.059       | 0.022         |
| 142.016 |             |            |             |               |             |              |                |            |             |               |
| 9       | 24.9        | 1.725      | 0.010       | 0.046         | 2.298       | 0.058        | 0.015          | 2.019      | 0.053       | 0.029         |
| 144.012 |             |            |             |               |             |              |                |            |             |               |
| 5       | 45.9        | 1.962      | -0.019      | 0.030         | 2.032       | -0.092       | 0.031          | 1.022      | -0.048      | 0.270         |
| 144.976 |             |            |             |               |             |              |                |            |             |               |
| 50.3    | 2.128       | -0.011     | 0.013       | 1.988         | -0.047      | 0.036        | 1.426          | -0.035     | 0.122       |               |
| 145.999 |             |            |             |               |             |              |                |            |             |               |
| 1       | 45.1        | 2.040      | 0.018       | 0.017         | 1.590       | 0.059        | 0.107          | 2.053      | 0.078       | 0.033         |
| 148.043 |             |            |             |               |             |              |                |            |             |               |
| 9       | 47.3        | 1.311      | 0.012       | 0.156         | 2.377       | 0.100        | 0.013          | 1.315      | 0.053       | 0.197         |
| 148.98  |             |            |             |               |             |              |                |            |             |               |
| 43.2    | 1.699       | 0.011      | 0.061       | 0.954         | 0.028       | 0.330        | 2.034          | 0.060      | 0.036       |               |
| 150.056 |             |            |             |               |             |              |                |            |             |               |
| 1       | 247.8       | 1.507      | 0.014       | 0.134         | 1.074       | 0.043        | 0.356          | 2.316      | 0.110       | 0.018         |
| 151.061 |             |            |             |               |             |              |                |            |             |               |
| 2       | 275         | 1.691      | -0.014      | 0.050         | 2.270       | -0.086       | 0.016          | 0.869      | -0.031      | 0.385         |
| 153.868 |             |            |             |               |             |              |                |            |             |               |
| 5       | 33.2        | 2.069      | 0.015       | 0.018         | 1.670       | 0.056        | 0.079          | 1.158      | 0.040       | 0.213         |
| 154.062 |             |            |             |               |             |              |                |            |             |               |
| 3       | 50.6        | 1.850      | 0.014       | 0.031         | 2.651       | 0.091        | 0.005          | 1.692      | 0.060       | 0.067         |
| 154.947 |             |            |             |               |             |              |                |            |             |               |
| 5       | 117.4       | 0.467      | -0.002      | 0.596         | 2.230       | -0.044       | 0.019          | 0.771      | -0.016      | 0.414         |

|         |       |        |        |       |        |        |       |        |        |       |
|---------|-------|--------|--------|-------|--------|--------|-------|--------|--------|-------|
| 155.071 |       |        |        |       |        |        |       |        |        |       |
| 4       | 35.7  | 2.393  | 0.022  | 0.007 | 2.070  | 0.086  | 0.032 | 2.260  | 0.098  | 0.016 |
| 156.027 |       |        |        |       |        |        |       |        |        |       |
| 9       | 46.7  | 2.417  | 0.018  | 0.006 | 2.802  | 0.096  | 0.004 | 2.605  | 0.090  | 0.007 |
| 157.011 |       |        |        |       |        |        |       |        |        |       |
| 9       | 39.9  | 1.464  | 0.012  | 0.131 | 1.007  | 0.039  | 0.322 | 2.099  | 0.084  | 0.034 |
| 159.114 |       |        |        |       |        |        |       |        |        |       |
| 96.8    | 2.325 | 0.019  | 0.011  | 0.941 | 0.035  | 0.334  | 1.636 | 0.064  | 0.083  |       |
| 161.045 |       |        |        |       |        |        |       |        |        |       |
| 6       | 278.2 | 0.679  | -0.005 | 0.447 | 0.766  | -0.025 | 0.432 | 2.504  | -0.086 | 0.007 |
| 163.061 |       |        |        |       |        |        |       |        |        |       |
| 3       | 136.8 | 0.763  | -0.007 | 0.405 | 0.532  | -0.023 | 0.582 | 2.024  | -0.089 | 0.030 |
| 163.967 |       |        |        |       |        |        |       |        |        |       |
| 7       | 107.2 | 2.095  | 0.019  | 0.019 | 1.290  | 0.053  | 0.185 | 1.830  | 0.078  | 0.055 |
| 168.999 |       |        |        |       |        |        |       |        |        |       |
| 3       | 290.5 | 1.675  | 0.012  | 0.063 | 0.300  | 0.010  | 0.758 | 2.208  | 0.074  | 0.019 |
| 172.929 |       |        |        |       |        |        |       |        |        |       |
| 122.4   | 1.292 | -0.009 | 0.130  | 2.673 | -0.084 | 0.004  | 1.143 | -0.037 | 0.216  |       |
| 176.009 |       |        |        |       |        |        |       |        |        |       |
| 5       | 44.2  | 0.901  | 0.008  | 0.301 | 2.171  | 0.087  | 0.021 | 0.869  | 0.035  | 0.358 |
| 177.040 |       |        |        |       |        |        |       |        |        |       |
| 5       | 282.6 | 2.586  | -0.016 | 0.003 | 3.683  | -0.102 | 0.000 | 2.456  | -0.071 | 0.007 |
| 179.962 |       |        |        |       |        |        |       |        |        |       |
| 6       | 133.6 | 1.867  | 0.014  | 0.036 | 0.861  | 0.029  | 0.381 | 2.072  | 0.073  | 0.027 |
| 180.959 |       |        |        |       |        |        |       |        |        |       |
| 9       | 129   | 2.521  | 0.019  | 0.003 | 2.303  | 0.077  | 0.015 | 1.965  | 0.069  | 0.033 |
| 181.018 |       |        |        |       |        |        |       |        |        |       |
| 3       | 61.1  | 1.773  | 0.011  | 0.042 | 1.010  | 0.028  | 0.310 | 2.246  | 0.067  | 0.015 |
| 182.315 |       |        |        |       |        |        |       |        |        |       |
| 4       | 42.8  | 0.805  | 0.007  | 0.348 | 0.975  | 0.037  | 0.305 | 2.191  | 0.087  | 0.017 |
| 182.988 |       |        |        |       |        |        |       |        |        |       |
| 8       | 54.7  | 2.110  | 0.016  | 0.017 | 0.963  | 0.034  | 0.315 | 1.890  | 0.069  | 0.042 |
| 184.019 |       |        |        |       |        |        |       |        |        |       |
| 4       | 36.6  | 2.124  | 0.015  | 0.012 | 3.676  | 0.111  | 0.000 | 1.680  | 0.051  | 0.075 |
| 197.154 |       |        |        |       |        |        |       |        |        |       |
| 6       | 130.2 | 1.740  | -0.010 | 0.187 | 2.087  | -0.061 | 0.102 | 1.557  | -0.038 | 0.322 |
| 199.134 |       |        |        |       |        |        |       |        |        |       |
| 285.7   | 2.082 | -0.020 | 0.016  | 1.888 | -0.082 | 0.045  | 1.544 | -0.069 | 0.095  |       |
| 201.022 |       |        |        |       |        |        |       |        |        |       |
| 7       | 45.7  | 0.581  | -0.006 | 0.499 | 2.108  | -0.100 | 0.025 | 0.225  | -0.008 | 0.855 |
| 203.092 |       |        |        |       |        |        |       |        |        |       |
| 5       | 22.8  | 1.641  | 0.013  | 0.056 | 1.101  | 0.040  | 0.244 | 2.076  | 0.078  | 0.024 |
| 203.129 |       |        |        |       |        |        |       |        |        |       |
| 91.6    | 2.816 | -0.023 | 0.001  | 2.372 | -0.087 | 0.011  | 1.932 | -0.073 | 0.036  |       |
| 210.918 |       |        |        |       |        |        |       |        |        |       |
| 3       | 97.4  | 2.166  | -0.008 | 0.011 | 1.981  | -0.034 | 0.037 | 1.582  | -0.028 | 0.090 |
| 213.064 |       |        |        |       |        |        |       |        |        |       |
| 4       | 39.9  | 1.157  | 0.007  | 0.332 | 2.293  | 0.083  | 0.017 | 1.887  | 0.068  | 0.052 |
| 216.024 |       |        |        |       |        |        |       |        |        |       |
| 6       | 40.5  | 0.845  | -0.008 | 0.334 | 1.236  | -0.056 | 0.191 | 2.129  | -0.100 | 0.021 |
| 224.015 |       |        |        |       |        |        |       |        |        |       |
| 1       | 47.5  | 1.190  | 0.009  | 0.216 | 1.139  | 0.036  | 0.325 | 2.116  | 0.084  | 0.024 |
| 224.818 |       |        |        |       |        |        |       |        |        |       |
| 9       | 42.6  | 1.785  | 0.015  | 0.061 | 2.258  | 0.091  | 0.019 | 0.782  | 0.030  | 0.449 |
| 225.024 |       |        |        |       |        |        |       |        |        |       |
| 2       | 68.5  | 2.222  | -0.012 | 0.013 | 1.147  | -0.028 | 0.226 | 0.696  | -0.017 | 0.473 |
| 227.129 |       |        |        |       |        |        |       |        |        |       |
| 26.4    | 1.251 | 0.013  | 0.142  | 1.183 | 0.054  | 0.215  | 2.153 | 0.102  | 0.019  |       |
| 228.994 |       |        |        |       |        |        |       |        |        |       |
| 4       | 28.4  | 2.688  | 0.024  | 0.002 | 0.728  | 0.030  | 0.443 | 1.566  | 0.066  | 0.091 |
| 231.123 |       |        |        |       |        |        |       |        |        |       |
| 8       | 283.9 | 1.633  | -0.015 | 0.072 | 3.084  | -0.135 | 0.001 | 1.550  | -0.070 | 0.100 |
| 232.008 |       |        |        |       |        |        |       |        |        |       |
| 6       | 39    | 2.514  | -0.015 | 0.003 | 2.622  | -0.071 | 0.005 | 1.958  | -0.055 | 0.034 |
| 232.059 |       |        |        |       |        |        |       |        |        |       |
| 47.1    | 1.904 | 0.009  | 0.038  | 1.530 | 0.032  | 0.126  | 2.087 | 0.044  | 0.036  |       |
| 232.913 |       |        |        |       |        |        |       |        |        |       |
| 7       | 107.7 | 2.722  | -0.013 | 0.001 | 3.464  | -0.072 | 0.000 | 2.753  | -0.059 | 0.003 |
| 234.157 |       |        |        |       |        |        |       |        |        |       |
| 7       | 191.8 | 1.185  | -0.008 | 0.242 | 2.488  | -0.084 | 0.011 | 0.749  | -0.023 | 0.496 |
| 239.935 |       |        |        |       |        |        |       |        |        |       |
| 46.2    | 1.823 | 0.017  | 0.032  | 0.313 | 0.011  | 0.777  | 2.056 | 0.090  | 0.026  |       |
| 241.214 |       |        |        |       |        |        |       |        |        |       |
| 7       | 219.1 | 1.851  | -0.017 | 0.052 | 2.336  | -0.104 | 0.015 | 0.983  | -0.042 | 0.340 |

|         |       |        |        |       |        |        |       |        |        |       |
|---------|-------|--------|--------|-------|--------|--------|-------|--------|--------|-------|
| 246.912 |       |        |        |       |        |        |       |        |        |       |
| 8       | 45    | 1.668  | 0.013  | 0.051 | 0.716  | 0.018  | 0.588 | 2.171  | 0.081  | 0.018 |
| 252.897 |       |        |        |       |        |        |       |        |        |       |
| 5       | 109.6 | 1.403  | 0.009  | 0.118 | 0.902  | 0.027  | 0.344 | 2.539  | 0.079  | 0.006 |
| 257.212 |       |        |        |       |        |        |       |        |        |       |
| 2       | 133.8 | 1.659  | -0.016 | 0.052 | 1.378  | -0.060 | 0.147 | 2.163  | -0.097 | 0.018 |
| 257.918 |       |        |        |       |        |        |       |        |        |       |
| 6       | 26.3  | 1.191  | -0.011 | 0.255 | 3.312  | -0.161 | 0.001 | 1.793  | -0.086 | 0.071 |
| 258.893 |       |        |        |       |        |        |       |        |        |       |
| 3       | 30.8  | 2.396  | -0.007 | 0.005 | 2.416  | -0.033 | 0.010 | 1.087  | -0.015 | 0.253 |
| 259.028 |       |        |        |       |        |        |       |        |        |       |
| 2       | 43.8  | 1.238  | 0.012  | 0.152 | 0.077  | 0.001  | 0.986 | 2.258  | 0.101  | 0.016 |
| 261.962 |       |        |        |       |        |        |       |        |        |       |
| 9       | 36.2  | 0.265  | 0.002  | 0.843 | 2.141  | 0.087  | 0.025 | 0.968  | 0.038  | 0.339 |
| 262.945 |       |        |        |       |        |        |       |        |        |       |
| 3       | 131   | 2.015  | 0.016  | 0.019 | 0.368  | 0.013  | 0.700 | 1.646  | 0.060  | 0.074 |
| 263.979 |       |        |        |       |        |        |       |        |        |       |
| 5       | 64.6  | 2.408  | 0.010  | 0.005 | 0.489  | 0.008  | 0.644 | 1.662  | 0.031  | 0.075 |
| 266.017 |       |        |        |       |        |        |       |        |        |       |
| 5       | 35.4  | 1.577  | -0.016 | 0.082 | 0.432  | -0.019 | 0.669 | 2.248  | -0.106 | 0.017 |
| 269.037 |       |        |        |       |        |        |       |        |        |       |
| 4       | 39.7  | 1.676  | -0.015 | 0.052 | 2.201  | -0.091 | 0.019 | 0.685  | -0.028 | 0.481 |
| 269.087 |       |        |        |       |        |        |       |        |        |       |
| 8       | 45.7  | 2.329  | 0.017  | 0.018 | 1.423  | 0.046  | 0.183 | 2.040  | 0.066  | 0.060 |
| 270.090 |       |        |        |       |        |        |       |        |        |       |
| 4       | 45.3  | 2.337  | 0.017  | 0.016 | 1.621  | 0.054  | 0.114 | 2.361  | 0.080  | 0.020 |
| 272.073 |       |        |        |       |        |        |       |        |        |       |
| 48.4    | 2.677 | 0.027  | 0.002  | 2.588 | 0.115  | 0.006  | 1.998 | 0.092  | 0.030  |       |
| 273.882 |       |        |        |       |        |        |       |        |        |       |
| 6       | 21.4  | 1.093  | 0.013  | 0.213 | 0.936  | 0.048  | 0.334 | 2.292  | 0.124  | 0.013 |
| 275.106 |       |        |        |       |        |        |       |        |        |       |
| 8       | 44.2  | 1.804  | 0.013  | 0.038 | 1.319  | 0.041  | 0.186 | 2.117  | 0.070  | 0.025 |
| 275.999 |       |        |        |       |        |        |       |        |        |       |
| 9       | 39.3  | 1.549  | -0.013 | 0.076 | 1.729  | -0.064 | 0.066 | 3.141  | -0.119 | 0.001 |
| 279.196 |       |        |        |       |        |        |       |        |        |       |
| 4       | 115.4 | 1.410  | -0.014 | 0.130 | 2.136  | -0.104 | 0.025 | 0.734  | -0.035 | 0.458 |
| 280.948 |       |        |        |       |        |        |       |        |        |       |
| 77.7    | 2.523 | -0.013 | 0.003  | 2.402 | -0.057 | 0.011  | 2.563 | -0.063 | 0.005  |       |
| 280.974 |       |        |        |       |        |        |       |        |        |       |
| 1       | 183.1 | 1.918  | -0.005 | 0.038 | 1.397  | -0.016 | 0.148 | 2.069  | -0.023 | 0.037 |
| 281.072 |       |        |        |       |        |        |       |        |        |       |
| 9       | 80.3  | 2.031  | 0.013  | 0.019 | 1.710  | 0.046  | 0.083 | 1.249  | 0.034  | 0.212 |
| 281.160 |       |        |        |       |        |        |       |        |        |       |
| 7       | 242.7 | 1.702  | -0.012 | 0.130 | 2.042  | -0.066 | 0.097 | 1.722  | -0.057 | 0.154 |
| 281.219 |       |        |        |       |        |        |       |        |        |       |
| 3       | 242.9 | 1.894  | -0.014 | 0.067 | 2.118  | -0.069 | 0.075 | 1.670  | -0.052 | 0.186 |
| 281.248 |       |        |        |       |        |        |       |        |        |       |
| 5       | 246   | 1.694  | -0.012 | 0.152 | 2.002  | -0.062 | 0.118 | 1.647  | -0.050 | 0.210 |
| 281.278 |       |        |        |       |        |        |       |        |        |       |
| 4       | 242.9 | 1.770  | -0.013 | 0.105 | 2.005  | -0.064 | 0.109 | 1.469  | -0.040 | 0.326 |
| 281.334 |       |        |        |       |        |        |       |        |        |       |
| 5       | 242.6 | 1.776  | -0.012 | 0.115 | 2.089  | -0.066 | 0.090 | 1.729  | -0.054 | 0.167 |
| 281.973 |       |        |        |       |        |        |       |        |        |       |
| 5       | 43.3  | 1.795  | 0.012  | 0.038 | 1.723  | 0.051  | 0.068 | 2.081  | 0.063  | 0.024 |
| 282.164 |       |        |        |       |        |        |       |        |        |       |
| 3       | 243.4 | 1.687  | -0.012 | 0.138 | 2.146  | -0.076 | 0.061 | 1.551  | -0.046 | 0.261 |
| 282.251 |       |        |        |       |        |        |       |        |        |       |
| 9       | 245.7 | 1.719  | -0.012 | 0.141 | 2.007  | -0.062 | 0.116 | 1.666  | -0.051 | 0.201 |
| 282.338 |       |        |        |       |        |        |       |        |        |       |
| 6       | 242.4 | 1.765  | -0.013 | 0.122 | 2.110  | -0.069 | 0.085 | 1.719  | -0.055 | 0.174 |
| 282.957 |       |        |        |       |        |        |       |        |        |       |
| 9       | 44.7  | 1.959  | 0.015  | 0.029 | 0.944  | 0.031  | 0.365 | 2.437  | 0.086  | 0.011 |
| 283.103 |       |        |        |       |        |        |       |        |        |       |
| 1       | 44.8  | 1.534  | -0.012 | 0.097 | 2.150  | -0.077 | 0.024 | 2.094  | -0.077 | 0.025 |
| 283.234 |       |        |        |       |        |        |       |        |        |       |
| 2       | 271.4 | 1.286  | -0.011 | 0.162 | 2.688  | -0.107 | 0.005 | 0.697  | -0.028 | 0.469 |
| 283.255 |       |        |        |       |        |        |       |        |        |       |
| 6       | 242.7 | 1.732  | -0.012 | 0.135 | 2.047  | -0.065 | 0.103 | 1.682  | -0.052 | 0.191 |

|         |       |        |        |       |        |        |       |        |        |       |  |
|---------|-------|--------|--------|-------|--------|--------|-------|--------|--------|-------|--|
| 283.294 |       |        |        |       |        |        |       |        |        |       |  |
| 3       | 271.3 | 1.503  | -0.011 | 0.140 | 2.843  | -0.111 | 0.003 | 0.937  | -0.035 | 0.360 |  |
| 284.896 |       |        |        |       |        |        |       |        |        |       |  |
| 8       | 27.5  | 1.809  | 0.010  | 0.038 | 2.348  | 0.055  | 0.014 | 2.162  | 0.053  | 0.019 |  |
| 286.059 |       |        |        |       |        |        |       |        |        |       |  |
| 9       | 35.1  | 2.163  | 0.019  | 0.012 | 1.725  | 0.066  | 0.068 | 1.732  | 0.067  | 0.068 |  |
| 289.105 |       |        |        |       |        |        |       |        |        |       |  |
| 9       | 26.5  | 1.254  | 0.008  | 0.159 | 0.467  | 0.014  | 0.632 | 2.261  | 0.070  | 0.014 |  |
| 289.376 |       |        |        |       |        |        |       |        |        |       |  |
| 7       | 256.2 | 1.755  | 0.013  | 0.080 | 2.052  | 0.075  | 0.044 | 1.150  | 0.026  | 0.495 |  |
| 289.956 |       |        |        |       |        |        |       |        |        |       |  |
| 5       | 66.4  | 1.588  | 0.008  | 0.066 | 1.394  | 0.032  | 0.140 | 2.584  | 0.061  | 0.005 |  |
| 291.124 |       |        |        |       |        |        |       |        |        |       |  |
| 4       | 125.5 | 0.614  | 0.004  | 0.519 | 2.051  | 0.068  | 0.034 | 0.180  | -0.001 | 0.966 |  |
| 292.080 |       |        |        |       |        |        |       |        |        |       |  |
| 4       | 35.8  | 1.681  | -0.017 | 0.048 | 0.620  | -0.027 | 0.518 | 2.839  | -0.129 | 0.002 |  |
| 292.882 |       |        |        |       |        |        |       |        |        |       |  |
| 5       | 79.8  | 1.247  | 0.005  | 0.149 | 2.021  | 0.038  | 0.032 | 1.734  | 0.034  | 0.060 |  |
| 296.267 |       |        |        |       |        |        |       |        |        |       |  |
| 4       | 257.4 | 1.989  | -0.018 | 0.036 | 2.122  | -0.081 | 0.050 | 2.089  | -0.084 | 0.044 |  |
| 296.921 |       |        |        |       |        |        |       |        |        |       |  |
| 1       | 65.2  | 1.450  | -0.008 | 0.117 | 1.628  | -0.042 | 0.107 | 2.460  | -0.066 | 0.011 |  |
| 304.070 |       |        |        |       |        |        |       |        |        |       |  |
| 5       | 38.6  | 1.213  | -0.013 | 0.157 | 0.194  | -0.006 | 0.886 | 2.353  | -0.116 | 0.010 |  |
| 304.871 |       |        |        |       |        |        |       |        |        |       |  |
| 1       | 44.6  | 1.803  | -0.014 | 0.037 | 1.589  | -0.054 | 0.097 | 2.205  | -0.079 | 0.017 |  |
| 304.898 |       |        |        |       |        |        |       |        |        |       |  |
| 9       | 31.5  | 0.475  | -0.002 | 0.580 | 2.103  | -0.045 | 0.027 | 1.157  | -0.025 | 0.222 |  |
| 310.15  |       |        |        |       |        |        |       |        |        |       |  |
| 45.6    | 2.216 | 0.015  | 0.024  | 1.373 | 0.036  | 0.256  | 1.927 | 0.059  | 0.065  |       |  |
| 310.902 |       |        |        |       |        |        |       |        |        |       |  |
| 2       | 140.9 | 2.252  | -0.009 | 0.009 | 1.997  | -0.036 | 0.034 | 2.381  | -0.044 | 0.009 |  |
| 312.893 |       |        |        |       |        |        |       |        |        |       |  |
| 7       | 118.6 | 2.827  | -0.014 | 0.001 | 2.854  | -0.065 | 0.002 | 1.629  | -0.038 | 0.078 |  |
| 318.885 |       |        |        |       |        |        |       |        |        |       |  |
| 2       | 76.9  | 2.105  | -0.018 | 0.015 | 1.389  | -0.053 | 0.146 | 1.736  | -0.068 | 0.062 |  |
| 321.207 |       |        |        |       |        |        |       |        |        |       |  |
| 1       | 194.8 | 1.917  | -0.017 | 0.040 | 2.258  | -0.091 | 0.025 | 2.092  | -0.086 | 0.037 |  |
| 322.209 |       |        |        |       |        |        |       |        |        |       |  |
| 205.5   | 2.326 | -0.020 | 0.008  | 2.289 | -0.088 | 0.018  | 2.548 | -0.102 | 0.006  |       |  |
| 322.855 |       |        |        |       |        |        |       |        |        |       |  |
| 5       | 43    | 1.948  | 0.013  | 0.033 | 1.206  | 0.036  | 0.220 | 2.011  | 0.061  | 0.040 |  |
| 322.955 |       |        |        |       |        |        |       |        |        |       |  |
| 5       | 79.2  | 1.151  | -0.009 | 0.244 | 2.347  | -0.098 | 0.013 | 0.963  | -0.039 | 0.339 |  |
| 326.086 |       |        |        |       |        |        |       |        |        |       |  |
| 9       | 36.7  | 0.477  | -0.004 | 0.592 | 1.198  | -0.047 | 0.205 | 3.011  | -0.121 | 0.001 |  |
| 327.090 |       |        |        |       |        |        |       |        |        |       |  |
| 5       | 36.5  | 2.308  | -0.017 | 0.006 | 1.726  | -0.053 | 0.077 | 1.383  | -0.043 | 0.153 |  |
| 327.144 |       |        |        |       |        |        |       |        |        |       |  |
| 9       | 242.9 | 1.718  | -0.012 | 0.127 | 2.094  | -0.067 | 0.082 | 1.680  | -0.051 | 0.187 |  |
| 327.216 |       |        |        |       |        |        |       |        |        |       |  |
| 9       | 242.3 | 1.648  | -0.011 | 0.148 | 2.063  | -0.066 | 0.078 | 1.743  | -0.056 | 0.142 |  |
| 327.254 |       |        |        |       |        |        |       |        |        |       |  |
| 1       | 244.5 | 1.747  | -0.012 | 0.125 | 2.087  | -0.067 | 0.088 | 1.689  | -0.052 | 0.189 |  |
| 327.291 |       |        |        |       |        |        |       |        |        |       |  |
| 2       | 240.2 | 1.292  | -0.011 | 0.162 | 2.651  | -0.108 | 0.005 | 1.061  | -0.044 | 0.262 |  |
| 327.362 |       |        |        |       |        |        |       |        |        |       |  |
| 6       | 242.4 | 1.723  | -0.012 | 0.133 | 2.070  | -0.066 | 0.093 | 1.672  | -0.052 | 0.192 |  |
| 327.485 |       |        |        |       |        |        |       |        |        |       |  |
| 35.4    | 2.056 | -0.009 | 0.017  | 1.460 | -0.024 | 0.169  | 1.540 | -0.029 | 0.101  |       |  |
| 328.257 |       |        |        |       |        |        |       |        |        |       |  |
| 5       | 244.5 | 1.687  | -0.011 | 0.151 | 2.033  | -0.064 | 0.104 | 1.652  | -0.050 | 0.204 |  |
| 329.261 |       |        |        |       |        |        |       |        |        |       |  |
| 2       | 242   | 1.694  | -0.012 | 0.147 | 2.038  | -0.064 | 0.103 | 1.665  | -0.051 | 0.196 |  |
| 329.359 |       |        |        |       |        |        |       |        |        |       |  |
| 2       | 226.4 | 0.783  | -0.006 | 0.495 | 2.114  | -0.096 | 0.033 | 0.283  | 0.003  | 0.947 |  |
| 333.924 |       |        |        |       |        |        |       |        |        |       |  |
| 6       | 77.5  | 2.327  | -0.012 | 0.006 | 2.947  | -0.065 | 0.002 | 1.146  | -0.025 | 0.228 |  |
| 334.879 |       |        |        |       |        |        |       |        |        |       |  |
| 7       | 29.8  | 2.320  | -0.020 | 0.008 | 2.334  | -0.092 | 0.013 | 1.958  | -0.079 | 0.035 |  |

|         |       |       |        |       |       |        |       |       |        |       |
|---------|-------|-------|--------|-------|-------|--------|-------|-------|--------|-------|
| 336.909 | 72.3  | 2.186 | -0.013 | 0.010 | 1.481 | -0.037 | 0.127 | 1.944 | -0.051 | 0.037 |
| 336.947 |       |       |        |       |       |        |       |       |        |       |
| 5       | 47.4  | 0.349 | -0.001 | 0.872 | 2.061 | -0.040 | 0.029 | 0.235 | 0.003  | 0.886 |
| 337.947 |       |       |        |       |       |        |       |       |        |       |
| 7       | 43.4  | 2.409 | 0.020  | 0.004 | 2.330 | 0.086  | 0.013 | 1.359 | 0.051  | 0.145 |
| 340.038 |       |       |        |       |       |        |       |       |        |       |
| 8       | 49.2  | 2.429 | -0.021 | 0.004 | 1.630 | -0.059 | 0.096 | 1.507 | -0.054 | 0.130 |
| 340.882 |       |       |        |       |       |        |       |       |        |       |
| 1       | 86.4  | 2.087 | 0.009  | 0.042 | 1.245 | 0.027  | 0.227 | 2.333 | 0.052  | 0.019 |
| 341.269 |       |       |        |       |       |        |       |       |        |       |
| 9       | 232.9 | 1.770 | -0.012 | 0.120 | 2.080 | -0.066 | 0.090 | 1.697 | -0.052 | 0.181 |
| 342.272 |       |       |        |       |       |        |       |       |        |       |
| 5       | 242.2 | 1.799 | -0.013 | 0.108 | 2.107 | -0.067 | 0.084 | 1.745 | -0.056 | 0.158 |
| 344.134 |       |       |        |       |       |        |       |       |        |       |
| 6       | 46.3  | 2.097 | 0.009  | 0.082 | 1.252 | 0.025  | 0.344 | 1.484 | 0.026  | 0.333 |
| 344.819 |       |       |        |       |       |        |       |       |        |       |
| 4       | 44.2  | 1.754 | -0.012 | 0.049 | 2.820 | -0.087 | 0.003 | 1.846 | -0.059 | 0.045 |
| 346.123 |       |       |        |       |       |        |       |       |        |       |
| 2       | 138.6 | 1.167 | -0.008 | 0.197 | 2.477 | -0.073 | 0.010 | 1.463 | -0.044 | 0.127 |
| 346.958 |       |       |        |       |       |        |       |       |        |       |
| 1       | 47.1  | 1.535 | -0.012 | 0.079 | 2.107 | -0.074 | 0.025 | 1.077 | -0.038 | 0.260 |
| 348.935 |       |       |        |       |       |        |       |       |        |       |
| 3       | 73.8  | 1.714 | -0.018 | 0.045 | 1.970 | -0.090 | 0.036 | 2.279 | -0.107 | 0.013 |
| 348.997 |       |       |        |       |       |        |       |       |        |       |
| 1       | 41.2  | 2.050 | -0.018 | 0.016 | 0.894 | -0.035 | 0.350 | 2.063 | -0.084 | 0.025 |
| 350.969 |       |       |        |       |       |        |       |       |        |       |
| 4       | 30.3  | 1.556 | -0.013 | 0.068 | 2.253 | -0.081 | 0.016 | 0.922 | -0.034 | 0.328 |
| 352.762 |       |       |        |       |       |        |       |       |        |       |
| 1       | 43.7  | 1.743 | -0.015 | 0.047 | 1.487 | -0.060 | 0.117 | 2.259 | -0.092 | 0.017 |
| 352.801 |       |       |        |       |       |        |       |       |        |       |
| 3       | 43.5  | 0.697 | -0.005 | 0.445 | 2.453 | -0.078 | 0.012 | 0.986 | -0.033 | 0.294 |
| 352.895 |       |       |        |       |       |        |       |       |        |       |
| 9       | 102.6 | 2.055 | -0.019 | 0.016 | 1.843 | -0.076 | 0.051 | 1.606 | -0.069 | 0.082 |
| 354.961 |       |       |        |       |       |        |       |       |        |       |
| 3       | 54.4  | 1.067 | -0.006 | 0.249 | 2.146 | -0.055 | 0.023 | 1.075 | -0.028 | 0.257 |
| 358.005 |       |       |        |       |       |        |       |       |        |       |
| 3       | 45.4  | 2.183 | 0.019  | 0.012 | 1.544 | 0.058  | 0.122 | 3.258 | 0.133  | 0.000 |
| 358.283 |       |       |        |       |       |        |       |       |        |       |
| 2       | 249.7 | 1.503 | -0.015 | 0.082 | 2.097 | -0.091 | 0.026 | 1.603 | -0.071 | 0.086 |
| 358.838 |       |       |        |       |       |        |       |       |        |       |
| 4       | 42.8  | 1.756 | -0.010 | 0.047 | 1.138 | -0.028 | 0.240 | 2.199 | -0.057 | 0.017 |
| 361.938 |       |       |        |       |       |        |       |       |        |       |
| 1       | 34.8  | 1.931 | -0.014 | 0.044 | 1.645 | -0.055 | 0.105 | 2.981 | -0.104 | 0.002 |
| 362.063 |       |       |        |       |       |        |       |       |        |       |
| 6       | 37    | 0.835 | -0.007 | 0.345 | 1.687 | -0.064 | 0.077 | 3.829 | -0.150 | 0.000 |
| 362.080 |       |       |        |       |       |        |       |       |        |       |
| 6       | 48    | 0.836 | -0.005 | 0.487 | 1.014 | -0.038 | 0.311 | 2.006 | -0.075 | 0.045 |
| 362.911 |       |       |        |       |       |        |       |       |        |       |
| 5       | 79.5  | 2.168 | -0.009 | 0.013 | 1.478 | -0.026 | 0.132 | 2.899 | -0.053 | 0.002 |
| 362.981 |       |       |        |       |       |        |       |       |        |       |
| 9       | 48.4  | 2.148 | -0.008 | 0.012 | 1.779 | -0.027 | 0.069 | 1.986 | -0.033 | 0.031 |
| 364.061 |       |       |        |       |       |        |       |       |        |       |
| 4       | 36.9  | 1.285 | -0.012 | 0.134 | 2.117 | -0.089 | 0.024 | 2.912 | -0.126 | 0.001 |
| 364.909 |       |       |        |       |       |        |       |       |        |       |
| 1       | 70.1  | 0.788 | 0.005  | 0.372 | 0.776 | 0.020  | 0.423 | 2.422 | 0.066  | 0.009 |
| 368.246 |       |       |        |       |       |        |       |       |        |       |
| 4       | 234.5 | 2.194 | -0.013 | 0.011 | 0.719 | -0.018 | 0.471 | 1.043 | -0.027 | 0.288 |
| 368.280 |       |       |        |       |       |        |       |       |        |       |
| 8       | 173   | 2.602 | 0.023  | 0.003 | 1.984 | 0.081  | 0.036 | 2.816 | 0.117  | 0.002 |
| 370.869 | 138.2 | 1.106 | -0.004 | 0.214 | 2.540 | -0.042 | 0.008 | 1.576 | -0.026 | 0.110 |
| 372.119 |       |       |        |       |       |        |       |       |        |       |
| 1       | 226.6 | 1.054 | -0.008 | 0.216 | 2.339 | -0.079 | 0.013 | 1.683 | -0.059 | 0.069 |
| 372.914 |       |       |        |       |       |        |       |       |        |       |
| 4       | 74.8  | 1.389 | -0.008 | 0.113 | 2.320 | -0.061 | 0.015 | 1.837 | -0.050 | 0.047 |
| 373.277 |       |       |        |       |       |        |       |       |        |       |
| 2       | 211   | 2.359 | -0.017 | 0.011 | 2.368 | -0.078 | 0.017 | 3.082 | -0.107 | 0.001 |

|         |       |       |        |       |       |        |       |       |        |       |  |
|---------|-------|-------|--------|-------|-------|--------|-------|-------|--------|-------|--|
| 374.519 |       |       |        |       |       |        |       |       |        |       |  |
| 1       | 267.1 | 2.105 | 0.010  | 0.016 | 1.332 | 0.028  | 0.184 | 1.658 | 0.037  | 0.082 |  |
| 375.015 | 67.1  | 0.360 | 0.000  | 0.967 | 2.073 | -0.057 | 0.038 | 0.390 | 0.003  | 0.922 |  |
| 377.236 |       |       |        |       |       |        |       |       |        |       |  |
| 6       | 242.8 | 1.897 | -0.014 | 0.090 | 2.157 | -0.070 | 0.074 | 1.795 | -0.057 | 0.153 |  |
| 377.919 |       |       |        |       |       |        |       |       |        |       |  |
| 1       | 90.5  | 1.765 | -0.014 | 0.050 | 1.466 | -0.052 | 0.129 | 2.003 | -0.074 | 0.032 |  |
| 378.220 |       |       |        |       |       |        |       |       |        |       |  |
| 4       | 231.3 | 0.937 | 0.001  | 0.885 | 2.094 | 0.059  | 0.101 | 0.840 | -0.004 | 0.905 |  |
| 378.239 |       |       |        |       |       |        |       |       |        |       |  |
| 2       | 241.7 | 1.821 | -0.012 | 0.120 | 2.125 | -0.068 | 0.084 | 1.807 | -0.057 | 0.148 |  |
| 379.232 |       |       |        |       |       |        |       |       |        |       |  |
| 3       | 242.5 | 2.440 | -0.021 | 0.008 | 2.410 | -0.086 | 0.027 | 1.934 | -0.068 | 0.082 |  |
| 380.236 |       |       |        |       |       |        |       |       |        |       |  |
| 3       | 242.5 | 2.167 | -0.016 | 0.025 | 1.749 | -0.045 | 0.202 | 2.326 | -0.079 | 0.024 |  |
| 380.902 |       |       |        |       |       |        |       |       |        |       |  |
| 2       | 103.9 | 0.717 | -0.004 | 0.420 | 2.158 | 0.057  | 0.027 | 0.191 | -0.005 | 0.844 |  |
| 381.231 |       |       |        |       |       |        |       |       |        |       |  |
| 2       | 168.3 | 2.236 | -0.022 | 0.009 | 1.200 | -0.053 | 0.205 | 1.911 | -0.087 | 0.038 |  |
| 392.317 |       |       |        |       |       |        |       |       |        |       |  |
| 2       | 178.4 | 1.601 | -0.014 | 0.067 | 2.381 | -0.092 | 0.011 | 1.583 | -0.062 | 0.093 |  |
| 393.012 |       |       |        |       |       |        |       |       |        |       |  |
| 7       | 37.2  | 1.825 | 0.006  | 0.073 | 2.041 | 0.036  | 0.039 | 1.392 | 0.023  | 0.198 |  |
| 394.860 |       |       |        |       |       |        |       |       |        |       |  |
| 6       | 130.1 | 1.904 | 0.017  | 0.031 | 2.313 | 0.095  | 0.014 | 2.175 | 0.092  | 0.019 |  |
| 398.901 |       |       |        |       |       |        |       |       |        |       |  |
| 7       | 83.3  | 1.948 | 0.010  | 0.025 | 1.463 | 0.034  | 0.128 | 2.118 | 0.052  | 0.022 |  |
| 399.219 |       |       |        |       |       |        |       |       |        |       |  |
| 4       | 218.3 | 1.655 | -0.010 | 0.054 | 2.385 | -0.063 | 0.011 | 1.069 | -0.029 | 0.251 |  |
| 401.870 |       |       |        |       |       |        |       |       |        |       |  |
| 2       | 107   | 1.146 | -0.009 | 0.185 | 0.692 | -0.022 | 0.508 | 2.014 | -0.074 | 0.028 |  |
| 402.867 |       |       |        |       |       |        |       |       |        |       |  |
| 4       | 89    | 1.169 | -0.007 | 0.175 | 2.131 | -0.056 | 0.024 | 1.309 | -0.035 | 0.159 |  |
| 402.905 |       |       |        |       |       |        |       |       |        |       |  |
| 2       | 75.3  | 1.642 | -0.013 | 0.079 | 2.167 | -0.082 | 0.024 | 1.461 | -0.055 | 0.135 |  |
| 406.909 |       |       |        |       |       |        |       |       |        |       |  |
| 7       | 86.5  | 1.987 | 0.018  | 0.020 | 0.770 | 0.029  | 0.445 | 2.699 | 0.111  | 0.003 |  |
| 407.291 | 194.5 | 3.472 | -0.022 | 0.000 | 3.988 | -0.116 | 0.000 | 2.256 | -0.068 | 0.014 |  |
| 409.984 |       |       |        |       |       |        |       |       |        |       |  |
| 9       | 38.1  | 1.503 | -0.013 | 0.078 | 3.037 | -0.114 | 0.001 | 1.440 | -0.056 | 0.119 |  |
| 410.257 |       |       |        |       |       |        |       |       |        |       |  |
| 5       | 200.6 | 2.281 | -0.014 | 0.013 | 1.274 | -0.036 | 0.198 | 2.057 | -0.062 | 0.029 |  |
| 412.859 |       |       |        |       |       |        |       |       |        |       |  |
| 7       | 121.6 | 0.566 | -0.003 | 0.696 | 0.175 | 0.004  | 0.901 | 2.122 | -0.070 | 0.029 |  |
| 412.873 |       |       |        |       |       |        |       |       |        |       |  |
| 9       | 25.7  | 1.244 | 0.010  | 0.180 | 1.337 | 0.051  | 0.174 | 2.053 | 0.079  | 0.035 |  |
| 414.998 |       |       |        |       |       |        |       |       |        |       |  |
| 7       | 66.7  | 1.534 | 0.013  | 0.115 | 1.583 | 0.067  | 0.104 | 2.011 | 0.086  | 0.037 |  |
| 415.216 |       |       |        |       |       |        |       |       |        |       |  |
| 1       | 47.1  | 1.281 | -0.011 | 0.140 | 2.081 | -0.083 | 0.029 | 0.912 | -0.038 | 0.325 |  |
| 417.268 |       |       |        |       |       |        |       |       |        |       |  |
| 1       | 263.3 | 2.597 | -0.015 | 0.003 | 2.378 | -0.064 | 0.012 | 2.553 | -0.070 | 0.006 |  |
| 422.948 |       |       |        |       |       |        |       |       |        |       |  |
| 7       | 53.9  | 1.074 | -0.004 | 0.270 | 2.121 | -0.044 | 0.025 | 1.209 | -0.025 | 0.211 |  |
| 425.25  | 185   | 1.234 | -0.011 | 0.198 | 0.624 | -0.012 | 0.762 | 2.249 | -0.098 | 0.015 |  |
| 425.992 |       |       |        |       |       |        |       |       |        |       |  |
| 3       | 46.9  | 1.467 | -0.014 | 0.085 | 2.185 | -0.090 | 0.020 | 1.315 | -0.056 | 0.154 |  |
| 426.051 |       |       |        |       |       |        |       |       |        |       |  |
| 9       | 185   | 1.777 | -0.006 | 0.045 | 2.208 | -0.036 | 0.020 | 0.952 | -0.015 | 0.322 |  |
| 427.049 |       |       |        |       |       |        |       |       |        |       |  |
| 9       | 185.6 | 0.999 | -0.003 | 0.262 | 2.048 | -0.033 | 0.031 | 0.168 | -0.002 | 0.920 |  |
| 428.820 |       |       |        |       |       |        |       |       |        |       |  |
| 5       | 47.5  | 2.346 | -0.023 | 0.006 | 2.500 | -0.110 | 0.008 | 1.875 | -0.085 | 0.043 |  |
| 433.140 |       |       |        |       |       |        |       |       |        |       |  |
| 3       | 263.5 | 2.404 | -0.013 | 0.007 | 3.206 | -0.078 | 0.001 | 1.846 | -0.045 | 0.056 |  |
| 435.270 |       |       |        |       |       |        |       |       |        |       |  |
| 9       | 173.5 | 1.288 | 0.011  | 0.145 | 3.059 | 0.117  | 0.001 | 0.360 | 0.013  | 0.735 |  |



|         |       |        |        |       |        |        |       |        |        |       |
|---------|-------|--------|--------|-------|--------|--------|-------|--------|--------|-------|
| 445.053 |       |        |        |       |        |        |       |        |        |       |
| 7       | 76.8  | 1.400  | -0.011 | 0.102 | 0.299  | -0.007 | 0.817 | 2.174  | -0.075 | 0.019 |
| 445.316 |       |        |        |       |        |        |       |        |        |       |
| 6       | 206   | 2.604  | 0.031  | 0.004 | 2.731  | 0.149  | 0.005 | 1.369  | 0.077  | 0.151 |
| 445.770 |       |        |        |       |        |        |       |        |        |       |
| 2       | 41.9  | 1.572  | -0.009 | 0.138 | 2.103  | -0.068 | 0.030 | 1.596  | -0.049 | 0.120 |
| 445.987 |       |        |        |       |        |        |       |        |        |       |
| 5       | 35.8  | 2.487  | 0.019  | 0.003 | 1.022  | 0.035  | 0.289 | 1.821  | 0.065  | 0.049 |
| 449.844 |       |        |        |       |        |        |       |        |        |       |
| 6       | 29.1  | 2.337  | -0.011 | 0.010 | 2.101  | -0.047 | 0.027 | 1.519  | -0.034 | 0.114 |
| 450.037 |       |        |        |       |        |        |       |        |        |       |
| 48.6    | 1.491 | -0.015 | 0.085  | 1.351 | -0.062 | 0.160  | 2.001 | -0.096 | 0.030  |       |
| 450.777 |       |        |        |       |        |        |       |        |        |       |
| 3       | 42.3  | 1.585  | 0.015  | 0.069 | 1.553  | 0.066  | 0.103 | 3.357  | 0.147  | 0.000 |
| 452.100 |       |        |        |       |        |        |       |        |        |       |
| 5       | 204.4 | 2.657  | -0.026 | 0.002 | 2.708  | -0.117 | 0.004 | 1.914  | -0.085 | 0.039 |
| 452.456 |       |        |        |       |        |        |       |        |        |       |
| 2       | 204.3 | 1.854  | -0.014 | 0.041 | 2.124  | -0.073 | 0.030 | 1.216  | -0.033 | 0.331 |
| 452.863 |       |        |        |       |        |        |       |        |        |       |
| 1       | 77.4  | 1.382  | -0.010 | 0.115 | 2.287  | -0.074 | 0.016 | 1.437  | -0.048 | 0.120 |
| 454.291 |       |        |        |       |        |        |       |        |        |       |
| 3       | 265.8 | 1.125  | 0.006  | 0.194 | 2.070  | 0.051  | 0.028 | 0.599  | 0.001  | 0.952 |
| 455.242 |       |        |        |       |        |        |       |        |        |       |
| 191.9   | 2.322 | -0.016 | 0.007  | 3.046 | -0.093 | 0.001  | 0.984 | -0.030 | 0.298  |       |
| 455.246 |       |        |        |       |        |        |       |        |        |       |
| 8       | 52    | 2.027  | -0.021 | 0.018 | 1.233  | -0.056 | 0.207 | 2.211  | -0.107 | 0.016 |
| 459.272 |       |        |        |       |        |        |       |        |        |       |
| 5       | 114.9 | 2.185  | 0.021  | 0.011 | 0.753  | 0.024  | 0.556 | 2.421  | 0.108  | 0.009 |
| 460.282 |       |        |        |       |        |        |       |        |        |       |
| 9       | 201.1 | 1.819  | 0.017  | 0.034 | 0.783  | 0.030  | 0.449 | 2.280  | 0.098  | 0.013 |
| 461.207 |       |        |        |       |        |        |       |        |        |       |
| 9       | 175.2 | 3.474  | 0.025  | 0.000 | 2.899  | 0.094  | 0.003 | 2.874  | 0.096  | 0.003 |
| 462.963 |       |        |        |       |        |        |       |        |        |       |
| 3       | 89.9  | 2.036  | -0.010 | 0.017 | 1.862  | -0.041 | 0.049 | 2.323  | -0.052 | 0.012 |
| 466.917 |       |        |        |       |        |        |       |        |        |       |
| 2       | 64    | 2.833  | -0.015 | 0.001 | 1.493  | -0.037 | 0.124 | 2.597  | -0.066 | 0.006 |
| 467.312 |       |        |        |       |        |        |       |        |        |       |
| 3       | 252.1 | 0.652  | -0.004 | 0.460 | 2.403  | -0.070 | 0.011 | 0.623  | 0.015  | 0.589 |
| 468.896 |       |        |        |       |        |        |       |        |        |       |
| 5       | 77.5  | 1.382  | 0.006  | 0.111 | 2.178  | 0.040  | 0.023 | 1.354  | 0.026  | 0.145 |
| 470.278 |       |        |        |       |        |        |       |        |        |       |
| 276.8   | 2.122 | -0.014 | 0.013  | 1.233 | -0.035 | 0.195  | 0.620 | -0.017 | 0.529  |       |
| 470.687 |       |        |        |       |        |        |       |        |        |       |
| 9       | 36.7  | 1.865  | -0.016 | 0.041 | 2.168  | -0.084 | 0.025 | 1.201  | -0.048 | 0.211 |
| 474.262 |       |        |        |       |        |        |       |        |        |       |
| 5       | 183.5 | 2.141  | 0.020  | 0.013 | 1.831  | 0.074  | 0.059 | 2.587  | 0.110  | 0.005 |
| 475.265 |       |        |        |       |        |        |       |        |        |       |
| 2       | 183.8 | 2.402  | 0.025  | 0.005 | 2.204  | 0.099  | 0.021 | 2.456  | 0.115  | 0.008 |
| 476.085 |       |        |        |       |        |        |       |        |        |       |
| 6       | 194.3 | 1.482  | 0.010  | 0.118 | 1.784  | 0.057  | 0.064 | 2.120  | 0.068  | 0.027 |
| 476.278 |       |        |        |       |        |        |       |        |        |       |
| 2       | 193.9 | 1.615  | 0.013  | 0.073 | 1.504  | 0.054  | 0.130 | 2.141  | 0.080  | 0.026 |
| 476.470 |       |        |        |       |        |        |       |        |        |       |
| 1       | 194.2 | 1.445  | 0.012  | 0.126 | 1.166  | 0.042  | 0.267 | 2.022  | 0.081  | 0.036 |
| 477.281 |       |        |        |       |        |        |       |        |        |       |
| 6       | 194   | 1.592  | 0.013  | 0.078 | 1.467  | 0.053  | 0.141 | 2.138  | 0.080  | 0.026 |
| 478.346 |       |        |        |       |        |        |       |        |        |       |
| 4       | 250   | 2.111  | 0.015  | 0.018 | 1.533  | 0.049  | 0.132 | 1.918  | 0.066  | 0.043 |
| 478.848 |       |        |        |       |        |        |       |        |        |       |
| 3       | 131.6 | 2.330  | 0.017  | 0.007 | 1.911  | 0.063  | 0.043 | 1.938  | 0.066  | 0.035 |
| 480.812 |       |        |        |       |        |        |       |        |        |       |
| 6       | 29.8  | 1.455  | -0.013 | 0.094 | 0.977  | -0.040 | 0.310 | 2.230  | -0.095 | 0.015 |
| 480.954 |       |        |        |       |        |        |       |        |        |       |
| 1       | 65.6  | 2.005  | 0.010  | 0.018 | 1.102  | 0.024  | 0.243 | 1.785  | 0.039  | 0.052 |
| 482.315 |       |        |        |       |        |        |       |        |        |       |
| 4       | 251.2 | 1.214  | -0.009 | 0.174 | 0.843  | -0.024 | 0.464 | 2.036  | -0.073 | 0.028 |
| 482.958 |       |        |        |       |        |        |       |        |        |       |
| 3       | 65.6  | 1.740  | 0.013  | 0.049 | 2.021  | 0.066  | 0.035 | 1.246  | 0.043  | 0.180 |
| 484.869 |       |        |        |       |        |        |       |        |        |       |
| 6       | 82.1  | 1.061  | 0.008  | 0.224 | 0.586  | 0.019  | 0.561 | 2.066  | 0.072  | 0.026 |

|         |       |        |        |       |        |        |       |        |        |       |  |
|---------|-------|--------|--------|-------|--------|--------|-------|--------|--------|-------|--|
| 485.768 |       |        |        |       |        |        |       |        |        |       |  |
| 6       | 41    | 1.712  | -0.010 | 0.046 | 2.089  | -0.053 | 0.031 | 0.996  | -0.025 | 0.312 |  |
| 490.979 |       |        |        |       |        |        |       |        |        |       |  |
| 4       | 70.3  | 2.440  | -0.010 | 0.005 | 2.103  | -0.040 | 0.026 | 1.487  | -0.028 | 0.116 |  |
| 493.484 |       |        |        |       |        |        |       |        |        |       |  |
| 7       | 35.3  | 1.608  | -0.009 | 0.061 | 2.445  | -0.063 | 0.009 | 1.163  | -0.031 | 0.213 |  |
| 494.257 |       |        |        |       |        |        |       |        |        |       |  |
| 1       | 167.6 | 1.192  | -0.010 | 0.170 | 2.022  | -0.074 | 0.032 | 1.478  | -0.055 | 0.115 |  |
| 494.338 |       |        |        |       |        |        |       |        |        |       |  |
| 7       | 196.7 | 2.233  | -0.019 | 0.013 | 1.554  | -0.060 | 0.104 | 0.802  | -0.031 | 0.403 |  |
| 495.260 |       |        |        |       |        |        |       |        |        |       |  |
| 2       | 204.7 | 2.001  | -0.017 | 0.024 | 1.943  | -0.074 | 0.043 | 0.710  | -0.025 | 0.508 |  |
| 498.260 |       |        |        |       |        |        |       |        |        |       |  |
| 8       | 183.1 | 2.096  | 0.017  | 0.018 | 2.154  | 0.081  | 0.026 | 1.528  | 0.055  | 0.130 |  |
| 499.822 |       |        |        |       |        |        |       |        |        |       |  |
| 1       | 177.5 | 2.065  | 0.010  | 0.025 | 1.518  | 0.035  | 0.119 | 2.352  | 0.056  | 0.012 |  |
| 502.871 |       |        |        |       |        |        |       |        |        |       |  |
| 4       | 35.5  | 2.164  | -0.017 | 0.016 | 1.338  | -0.048 | 0.164 | 1.725  | -0.063 | 0.068 |  |
| 504.873 |       |        |        |       |        |        |       |        |        |       |  |
| 1       | 74.4  | 1.719  | -0.011 | 0.061 | 2.011  | -0.059 | 0.037 | 2.457  | -0.073 | 0.010 |  |
| 506.873 |       |        |        |       |        |        |       |        |        |       |  |
| 3       | 71.4  | 0.560  | -0.003 | 0.552 | 0.315  | -0.008 | 0.771 | 2.413  | -0.074 | 0.009 |  |
| 507.271 |       |        |        |       |        |        |       |        |        |       |  |
| 6       | 156.6 | 2.151  | 0.015  | 0.014 | 1.555  | 0.046  | 0.132 | 2.314  | 0.075  | 0.015 |  |
| 507.351 |       |        |        |       |        |        |       |        |        |       |  |
| 198.3   | 1.279 | -0.009 | 0.275  | 2.049 | -0.084 | 0.036  | 0.480 | -0.010 | 0.813  |       |  |
| 512.299 |       |        |        |       |        |        |       |        |        |       |  |
| 3       | 200.7 | 2.118  | 0.013  | 0.020 | 2.239  | 0.064  | 0.021 | 2.087  | 0.060  | 0.032 |  |
| 515.326 |       |        |        |       |        |        |       |        |        |       |  |
| 6       | 35    | 2.012  | 0.017  | 0.019 | 1.181  | 0.045  | 0.218 | 0.975  | 0.037  | 0.315 |  |
| 516.793 |       |        |        |       |        |        |       |        |        |       |  |
| 2       | 113.3 | 0.531  | -0.004 | 0.594 | 0.210  | 0.001  | 0.989 | 2.005  | -0.078 | 0.029 |  |
| 516.864 |       |        |        |       |        |        |       |        |        |       |  |
| 3       | 49.7  | 0.203  | -0.001 | 0.853 | 2.023  | -0.067 | 0.031 | 0.304  | -0.006 | 0.855 |  |
| 524.056 |       |        |        |       |        |        |       |        |        |       |  |
| 191.6   | 1.449 | -0.013 | 0.102  | 2.182 | -0.089 | 0.022  | 0.665 | -0.023 | 0.554  |       |  |
| 526.854 |       |        |        |       |        |        |       |        |        |       |  |
| 9       | 81.4  | 2.788  | 0.016  | 0.002 | 2.798  | 0.072  | 0.004 | 2.338  | 0.063  | 0.013 |  |
| 528.285 |       |        |        |       |        |        |       |        |        |       |  |
| 1       | 210.9 | 1.402  | -0.013 | 0.102 | 2.074  | -0.087 | 0.028 | 0.803  | -0.035 | 0.387 |  |
| 529.268 |       |        |        |       |        |        |       |        |        |       |  |
| 4       | 248.4 | 3.440  | -0.016 | 0.000 | 3.356  | -0.069 | 0.000 | 2.141  | -0.045 | 0.022 |  |
| 530.791 |       |        |        |       |        |        |       |        |        |       |  |
| 9       | 113.5 | 1.894  | -0.017 | 0.027 | 2.088  | -0.084 | 0.026 | 2.029  | -0.083 | 0.028 |  |
| 530.888 |       |        |        |       |        |        |       |        |        |       |  |
| 5       | 57.1  | 2.139  | -0.011 | 0.022 | 1.555  | -0.038 | 0.109 | 0.658  | -0.015 | 0.540 |  |
| 531.174 |       |        |        |       |        |        |       |        |        |       |  |
| 7       | 221   | 0.810  | -0.005 | 0.376 | 1.200  | 0.032  | 0.282 | 2.034  | -0.066 | 0.028 |  |
| 534.962 |       |        |        |       |        |        |       |        |        |       |  |
| 1       | 56.6  | 1.379  | -0.010 | 0.106 | 1.563  | -0.050 | 0.097 | 2.318  | -0.076 | 0.012 |  |
| 537.330 |       |        |        |       |        |        |       |        |        |       |  |
| 7       | 187.5 | 1.412  | 0.014  | 0.100 | 1.262  | 0.054  | 0.191 | 2.149  | 0.098  | 0.020 |  |
| 540.345 |       |        |        |       |        |        |       |        |        |       |  |
| 7       | 274.6 | 1.553  | 0.012  | 0.077 | 0.979  | 0.031  | 0.345 | 2.188  | 0.076  | 0.020 |  |
| 541.322 |       |        |        |       |        |        |       |        |        |       |  |
| 3       | 285.9 | 1.327  | -0.008 | 0.144 | 2.950  | -0.081 | 0.002 | 0.643  | -0.017 | 0.514 |  |
| 541.333 |       |        |        |       |        |        |       |        |        |       |  |
| 7       | 274.1 | 2.530  | 0.013  | 0.003 | 2.019  | 0.045  | 0.035 | 2.431  | 0.056  | 0.009 |  |
| 544.201 |       |        |        |       |        |        |       |        |        |       |  |
| 8       | 34    | 1.451  | 0.011  | 0.089 | 1.785  | 0.060  | 0.063 | 2.613  | 0.092  | 0.005 |  |
| 544.905 |       |        |        |       |        |        |       |        |        |       |  |
| 3       | 57    | 1.616  | 0.014  | 0.058 | 0.811  | 0.032  | 0.398 | 2.569  | 0.105  | 0.005 |  |
| 545.268 |       |        |        |       |        |        |       |        |        |       |  |
| 3       | 186.1 | 1.907  | 0.018  | 0.026 | 1.247  | 0.050  | 0.212 | 2.697  | 0.118  | 0.003 |  |
| 545.915 |       |        |        |       |        |        |       |        |        |       |  |
| 58      | 2.107 | 0.013  | 0.013  | 1.296 | 0.035  | 0.170  | 1.810 | 0.051  | 0.049  |       |  |
| 550.771 |       |        |        |       |        |        |       |        |        |       |  |
| 6       | 42.6  | 1.128  | 0.003  | 0.285 | 1.298  | 0.019  | 0.200 | 2.578  | 0.039  | 0.007 |  |
| 552.989 |       |        |        |       |        |        |       |        |        |       |  |
| 1       | 70.9  | 1.646  | 0.007  | 0.089 | 3.229  | 0.066  | 0.001 | 1.131  | 0.022  | 0.261 |  |

|         |       |       |        |       |       |        |       |       |        |       |  |
|---------|-------|-------|--------|-------|-------|--------|-------|-------|--------|-------|--|
| 554.105 |       |       |        |       |       |        |       |       |        |       |  |
| 5       | 282   | 0.838 | -0.007 | 0.372 | 1.836 | -0.075 | 0.054 | 2.040 | -0.086 | 0.027 |  |
| 554.588 |       |       |        |       |       |        |       |       |        |       |  |
| 2       | 281.8 | 2.065 | -0.018 | 0.015 | 2.499 | -0.097 | 0.008 | 2.691 | -0.108 | 0.003 |  |
| 556.353 | 275.4 | 2.029 | 0.008  | 0.054 | 1.898 | 0.037  | 0.060 | 1.715 | 0.029  | 0.142 |  |
| 557.936 |       |       |        |       |       |        |       |       |        |       |  |
| 9       | 65.8  | 3.038 | 0.027  | 0.001 | 2.443 | 0.098  | 0.014 | 3.066 | 0.130  | 0.001 |  |
| 558.828 |       |       |        |       |       |        |       |       |        |       |  |
| 4       | 84.5  | 0.969 | -0.009 | 0.268 | 2.079 | -0.083 | 0.027 | 0.618 | -0.025 | 0.506 |  |
| 560.789 |       |       |        |       |       |        |       |       |        |       |  |
| 1       | 110.1 | 1.738 | 0.014  | 0.044 | 0.550 | 0.020  | 0.569 | 2.194 | 0.083  | 0.017 |  |
| 562.314 | 199.7 | 2.769 | 0.020  | 0.001 | 2.607 | 0.082  | 0.006 | 2.902 | 0.094  | 0.002 |  |
| 563.317 |       |       |        |       |       |        |       |       |        |       |  |
| 9       | 200.5 | 2.848 | 0.021  | 0.001 | 2.547 | 0.083  | 0.008 | 2.948 | 0.098  | 0.002 |  |
| 567.350 |       |       |        |       |       |        |       |       |        |       |  |
| 3       | 281.3 | 2.034 | 0.009  | 0.021 | 1.455 | 0.028  | 0.151 | 1.583 | 0.031  | 0.119 |  |
| 576.329 |       |       |        |       |       |        |       |       |        |       |  |
| 7       | 200.5 | 2.578 | 0.018  | 0.003 | 2.445 | 0.075  | 0.010 | 2.789 | 0.087  | 0.003 |  |
| 577.333 |       |       |        |       |       |        |       |       |        |       |  |
| 4       | 200.8 | 2.280 | 0.019  | 0.009 | 2.287 | 0.083  | 0.018 | 2.261 | 0.083  | 0.019 |  |
| 578.302 | 218.8 | 1.838 | 0.018  | 0.034 | 2.421 | 0.104  | 0.011 | 1.865 | 0.083  | 0.044 |  |
| 580.286 |       |       |        |       |       |        |       |       |        |       |  |
| 1       | 199.8 | 2.189 | 0.017  | 0.015 | 1.896 | 0.065  | 0.052 | 1.769 | 0.060  | 0.077 |  |
| 580.771 |       |       |        |       |       |        |       |       |        |       |  |
| 8       | 107   | 1.304 | 0.007  | 0.130 | 2.033 | 0.051  | 0.031 | 1.318 | 0.034  | 0.153 |  |
| 580.959 |       |       |        |       |       |        |       |       |        |       |  |
| 2       | 57.8  | 1.099 | -0.008 | 0.257 | 0.432 | -0.010 | 0.774 | 2.045 | -0.075 | 0.029 |  |
| 583.757 |       |       |        |       |       |        |       |       |        |       |  |
| 9       | 122.6 | 2.139 | 0.017  | 0.017 | 1.413 | 0.051  | 0.152 | 2.498 | 0.096  | 0.007 |  |
| 587.317 |       |       |        |       |       |        |       |       |        |       |  |
| 6       | 196.3 | 2.028 | 0.014  | 0.023 | 1.831 | 0.058  | 0.062 | 1.580 | 0.051  | 0.107 |  |
| 590.857 |       |       |        |       |       |        |       |       |        |       |  |
| 4       | 66.7  | 1.679 | -0.013 | 0.065 | 2.460 | -0.087 | 0.009 | 1.497 | -0.054 | 0.111 |  |
| 593.365 |       |       |        |       |       |        |       |       |        |       |  |
| 6       | 172.2 | 1.352 | 0.010  | 0.112 | 2.133 | 0.070  | 0.025 | 0.696 | 0.024  | 0.452 |  |
| 594.278 |       |       |        |       |       |        |       |       |        |       |  |
| 9       | 288.2 | 1.318 | -0.012 | 0.142 | 2.875 | -0.125 | 0.002 | 1.048 | -0.046 | 0.271 |  |
| 594.499 |       |       |        |       |       |        |       |       |        |       |  |
| 4       | 36.1  | 1.387 | -0.005 | 0.268 | 2.000 | -0.048 | 0.040 | 0.892 | -0.009 | 0.695 |  |
| 594.946 |       |       |        |       |       |        |       |       |        |       |  |
| 8       | 65.8  | 2.330 | -0.019 | 0.008 | 1.557 | -0.057 | 0.099 | 1.512 | -0.057 | 0.104 |  |
| 595.287 |       |       |        |       |       |        |       |       |        |       |  |
| 9       | 149.4 | 2.774 | 0.021  | 0.001 | 2.054 | 0.067  | 0.033 | 2.778 | 0.094  | 0.003 |  |
| 596.291 |       |       |        |       |       |        |       |       |        |       |  |
| 7       | 151.2 | 2.689 | 0.021  | 0.002 | 2.003 | 0.067  | 0.038 | 2.767 | 0.097  | 0.003 |  |
| 599.781 |       |       |        |       |       |        |       |       |        |       |  |
| 6       | 105.8 | 0.990 | 0.008  | 0.257 | 2.500 | 0.085  | 0.009 | 1.826 | 0.065  | 0.050 |  |
| 606.377 |       |       |        |       |       |        |       |       |        |       |  |
| 4       | 177.1 | 1.492 | 0.014  | 0.095 | 0.346 | 0.012  | 0.768 | 2.038 | 0.087  | 0.032 |  |
| 607.917 |       |       |        |       |       |        |       |       |        |       |  |
| 6       | 65    | 1.476 | -0.011 | 0.096 | 2.188 | -0.076 | 0.021 | 1.153 | -0.041 | 0.226 |  |
| 614.949 |       |       |        |       |       |        |       |       |        |       |  |
| 9       | 59.9  | 1.154 | -0.008 | 0.210 | 1.024 | -0.032 | 0.284 | 2.171 | -0.070 | 0.020 |  |
| 617.325 |       |       |        |       |       |        |       |       |        |       |  |
| 4       | 280.8 | 1.416 | -0.009 | 0.115 | 1.772 | -0.053 | 0.070 | 2.020 | -0.064 | 0.030 |  |
| 619.922 |       |       |        |       |       |        |       |       |        |       |  |
| 4       | 59.8  | 2.604 | -0.013 | 0.002 | 1.870 | -0.043 | 0.049 | 1.693 | -0.040 | 0.066 |  |
| 620.024 |       |       |        |       |       |        |       |       |        |       |  |
| 5       | 69.1  | 2.002 | -0.007 | 0.018 | 1.191 | -0.019 | 0.208 | 1.837 | -0.030 | 0.047 |  |
| 621.208 |       |       |        |       |       |        |       |       |        |       |  |
| 7       | 250.7 | 2.040 | 0.013  | 0.017 | 1.925 | 0.053  | 0.041 | 1.510 | 0.043  | 0.102 |  |
| 621.301 |       |       |        |       |       |        |       |       |        |       |  |
| 8       | 155   | 1.921 | 0.014  | 0.028 | 1.694 | 0.052  | 0.091 | 2.063 | 0.066  | 0.033 |  |
| 623.159 |       |       |        |       |       |        |       |       |        |       |  |
| 4       | 217.9 | 0.845 | -0.008 | 0.341 | 2.266 | -0.093 | 0.017 | 1.216 | -0.051 | 0.196 |  |
| 625.542 |       |       |        |       |       |        |       |       |        |       |  |
| 1       | 247.2 | 1.735 | -0.013 | 0.085 | 2.270 | -0.077 | 0.035 | 1.751 | -0.058 | 0.120 |  |

|         |       |        |        |       |        |        |       |        |        |       |
|---------|-------|--------|--------|-------|--------|--------|-------|--------|--------|-------|
| 626.778 |       |        |        |       |        |        |       |        |        |       |
| 5       | 105.8 | 2.619  | 0.021  | 0.002 | 2.173  | 0.076  | 0.023 | 2.116  | 0.076  | 0.024 |
| 626.956 |       |        |        |       |        |        |       |        |        |       |
| 2       | 69.3  | 2.241  | -0.012 | 0.008 | 1.549  | -0.036 | 0.101 | 0.509  | -0.011 | 0.609 |
| 630.303 |       |        |        |       |        |        |       |        |        |       |
| 5       | 199.7 | 1.537  | -0.011 | 0.075 | 1.100  | -0.033 | 0.255 | 2.306  | -0.074 | 0.012 |
| 633.036 |       |        |        |       |        |        |       |        |        |       |
| 3       | 70.7  | 2.611  | -0.012 | 0.003 | 2.785  | -0.060 | 0.003 | 2.102  | -0.047 | 0.023 |
| 635.337 |       |        |        |       |        |        |       |        |        |       |
| 9       | 170.7 | 2.052  | 0.017  | 0.016 | 2.099  | 0.079  | 0.026 | 1.785  | 0.069  | 0.053 |
| 636.350 |       |        |        |       |        |        |       |        |        |       |
| 6       | 278.1 | 1.751  | 0.014  | 0.041 | 2.286  | 0.079  | 0.015 | 1.171  | 0.041  | 0.218 |
| 643.289 |       |        |        |       |        |        |       |        |        |       |
| 7       | 152.2 | 2.346  | 0.018  | 0.006 | 1.669  | 0.056  | 0.086 | 1.139  | 0.040  | 0.224 |
| 645.305 |       |        |        |       |        |        |       |        |        |       |
| 6       | 156.6 | 2.461  | 0.020  | 0.004 | 1.157  | 0.039  | 0.261 | 2.061  | 0.076  | 0.028 |
| 647.899 |       |        |        |       |        |        |       |        |        |       |
| 8       | 61.8  | 2.169  | -0.014 | 0.011 | 1.157  | -0.033 | 0.232 | 1.796  | -0.053 | 0.051 |
| 652.345 |       |        |        |       |        |        |       |        |        |       |
| 6       | 179.5 | 2.084  | -0.014 | 0.015 | 2.088  | -0.061 | 0.027 | 2.064  | -0.062 | 0.026 |
| 653.170 |       |        |        |       |        |        |       |        |        |       |
| 2       | 198.3 | 1.304  | 0.010  | 0.232 | 2.512  | 0.097  | 0.013 | 1.134  | 0.043  | 0.278 |
| 655.927 |       |        |        |       |        |        |       |        |        |       |
| 4       | 66.3  | 1.658  | -0.013 | 0.054 | 1.425  | -0.049 | 0.132 | 2.360  | -0.082 | 0.011 |
| 666.912 |       |        |        |       |        |        |       |        |        |       |
| 8       | 67.2  | 0.940  | -0.009 | 0.272 | 1.679  | -0.067 | 0.075 | 2.054  | -0.085 | 0.027 |
| 687.540 |       |        |        |       |        |        |       |        |        |       |
| 1       | 235.9 | 1.958  | -0.010 | 0.077 | 2.203  | -0.053 | 0.064 | 1.889  | -0.046 | 0.114 |
| 688.012 |       |        |        |       |        |        |       |        |        |       |
| 9       | 68.4  | 2.151  | -0.008 | 0.011 | 2.388  | -0.040 | 0.011 | 2.066  | -0.036 | 0.024 |
| 688.544 |       |        |        |       |        |        |       |        |        |       |
| 8       | 240.7 | 1.946  | -0.010 | 0.079 | 2.202  | -0.053 | 0.064 | 1.846  | -0.044 | 0.128 |
| 690.557 |       |        |        |       |        |        |       |        |        |       |
| 1       | 260.9 | 1.716  | -0.009 | 0.124 | 2.142  | -0.057 | 0.056 | 1.637  | -0.040 | 0.181 |
| 712.545 |       |        |        |       |        |        |       |        |        |       |
| 3       | 228.6 | 1.661  | 0.009  | 0.060 | 2.013  | 0.051  | 0.040 | 1.110  | 0.028  | 0.255 |
| 722.894 |       |        |        |       |        |        |       |        |        |       |
| 3       | 60.2  | 2.032  | 0.007  | 0.017 | 0.698  | 0.010  | 0.494 | 1.518  | 0.024  | 0.104 |
| 750.926 |       |        |        |       |        |        |       |        |        |       |
| 6       | 60.6  | 1.510  | 0.005  | 0.077 | 0.989  | 0.016  | 0.295 | 2.175  | 0.035  | 0.018 |
| 755.553 |       |        |        |       |        |        |       |        |        |       |
| 206.6   | 2.153 | -0.018 | 0.029  | 1.778 | -0.066 | 0.093  | 2.880 | -0.117 | 0.003  |       |
| 761.596 |       |        |        |       |        |        |       |        |        |       |
| 4       | 271.4 | 1.849  | -0.020 | 0.032 | 2.939  | -0.142 | 0.002 | 1.417  | -0.071 | 0.124 |
| 763.507 |       |        |        |       |        |        |       |        |        |       |
| 221.2   | 1.299 | -0.006 | 0.134  | 2.026 | -0.041 | 0.031  | 0.938 | -0.019 | 0.334  |       |
| 763.603 |       |        |        |       |        |        |       |        |        |       |
| 2       | 281.7 | 1.385  | -0.007 | 0.127 | 2.245  | -0.052 | 0.019 | 2.200  | -0.053 | 0.017 |
| 783.674 |       |        |        |       |        |        |       |        |        |       |
| 5       | 35.3  | 1.905  | 0.016  | 0.025 | 1.296  | 0.049  | 0.170 | 2.190  | 0.086  | 0.017 |
| 801.586 |       |        |        |       |        |        |       |        |        |       |
| 7       | 239   | 1.449  | -0.011 | 0.125 | 2.008  | -0.065 | 0.057 | 1.048  | -0.028 | 0.410 |
| 804.898 |       |        |        |       |        |        |       |        |        |       |
| 1       | 61.8  | 1.953  | 0.007  | 0.022 | 0.608  | 0.010  | 0.523 | 2.692  | 0.045  | 0.003 |
| 810.568 |       |        |        |       |        |        |       |        |        |       |
| 1       | 282.5 | 0.490  | 0.002  | 0.642 | 2.062  | -0.056 | 0.029 | 0.127  | -0.001 | 0.974 |
| 816.577 |       |        |        |       |        |        |       |        |        |       |
| 7       | 246.9 | 1.198  | -0.009 | 0.208 | 2.001  | -0.073 | 0.043 | 1.256  | -0.045 | 0.216 |
| 818.913 |       |        |        |       |        |        |       |        |        |       |
| 5       | 61.9  | 2.305  | 0.007  | 0.007 | 0.481  | 0.004  | 0.749 | 2.287  | 0.033  | 0.013 |
| 819.596 |       |        |        |       |        |        |       |        |        |       |
| 5       | 280.4 | 1.218  | -0.011 | 0.162 | 0.413  | -0.014 | 0.725 | 2.493  | -0.105 | 0.007 |
| 824.581 |       |        |        |       |        |        |       |        |        |       |
| 6       | 237.6 | 2.183  | 0.017  | 0.016 | 1.511  | 0.048  | 0.171 | 2.068  | 0.075  | 0.033 |
| 835.013 |       |        |        |       |        |        |       |        |        |       |
| 5       | 35.9  | 1.770  | -0.009 | 0.104 | 2.231  | -0.061 | 0.023 | 1.455  | -0.032 | 0.245 |
| 836.585 |       |        |        |       |        |        |       |        |        |       |
| 3       | 197.4 | 2.274  | -0.019 | 0.007 | 1.590  | -0.058 | 0.093 | 2.177  | -0.083 | 0.018 |
| 837.562 |       |        |        |       |        |        |       |        |        |       |
| 241.2   | 1.651 | -0.010 | 0.144  | 2.383 | -0.071 | 0.027  | 1.557 | -0.040 | 0.220  |       |

|         |       |       |        |       |       |        |       |       |        |       |
|---------|-------|-------|--------|-------|-------|--------|-------|-------|--------|-------|
| 838.009 |       |       |        |       |       |        |       |       |        |       |
| 6       | 35.6  | 2.184 | -0.009 | 0.010 | 1.303 | -0.022 | 0.214 | 1.477 | -0.028 | 0.112 |
| 840.144 |       |       |        |       |       |        |       |       |        |       |
| 7       | 194.3 | 1.709 | 0.015  | 0.045 | 1.515 | 0.056  | 0.121 | 2.464 | 0.096  | 0.008 |
| 848.567 |       |       |        |       |       |        |       |       |        |       |
| 4       | 206.5 | 0.637 | 0.005  | 0.521 | 0.950 | 0.037  | 0.334 | 2.314 | 0.093  | 0.014 |
| 871.603 |       |       |        |       |       |        |       |       |        |       |
| 3       | 276.1 | 2.020 | 0.018  | 0.019 | 1.004 | 0.039  | 0.291 | 2.702 | 0.109  | 0.003 |
| 883.578 |       |       |        |       |       |        |       |       |        |       |
| 1       | 194.5 | 1.254 | -0.012 | 0.150 | 2.171 | -0.091 | 0.021 | 2.764 | -0.119 | 0.002 |
| 884.539 |       |       |        |       |       |        |       |       |        |       |
| 9       | 221.7 | 1.810 | -0.018 | 0.033 | 0.243 | -0.008 | 0.847 | 2.259 | -0.101 | 0.014 |
| 892.610 |       |       |        |       |       |        |       |       |        |       |
| 7       | 285.1 | 2.061 | 0.017  | 0.019 | 0.209 | 0.006  | 0.867 | 2.043 | 0.080  | 0.028 |
| 898.642 |       |       |        |       |       |        |       |       |        |       |
| 1       | 265.8 | 1.343 | -0.009 | 0.150 | 2.740 | -0.086 | 0.004 | 1.397 | -0.040 | 0.182 |
| 928.572 |       |       |        |       |       |        |       |       |        |       |
| 1       | 155.3 | 2.251 | -0.016 | 0.008 | 1.610 | -0.052 | 0.090 | 0.943 | -0.029 | 0.345 |
| 994.628 |       |       |        |       |       |        |       |       |        |       |
| 1       | 221   | 2.073 | 0.017  | 0.015 | 1.330 | 0.047  | 0.162 | 1.517 | 0.055  | 0.106 |
| 1023.64 |       |       |        |       |       |        |       |       |        |       |
| 53      | 193.4 | 2.741 | -0.021 | 0.001 | 2.885 | -0.100 | 0.002 | 2.207 | -0.078 | 0.017 |
| 1038.81 |       |       |        |       |       |        |       |       |        |       |
| 3       | 244   | 2.483 | -0.018 | 0.007 | 2.153 | -0.063 | 0.056 | 2.613 | -0.087 | 0.009 |
| 1051.02 |       |       |        |       |       |        |       |       |        |       |
| 07      | 35.8  | 1.822 | -0.007 | 0.041 | 1.356 | -0.021 | 0.207 | 2.079 | -0.037 | 0.026 |
| 1054.01 |       |       |        |       |       |        |       |       |        |       |
| 66      | 35.7  | 1.753 | -0.007 | 0.066 | 2.279 | -0.042 | 0.016 | 0.994 | -0.011 | 0.540 |
| 1081.65 |       |       |        |       |       |        |       |       |        |       |
| 19      | 214.8 | 2.509 | -0.020 | 0.003 | 1.825 | -0.066 | 0.058 | 2.927 | -0.110 | 0.001 |
| 1112.70 |       |       |        |       |       |        |       |       |        |       |
| 14      | 214.7 | 2.328 | -0.012 | 0.006 | 2.690 | -0.062 | 0.004 | 2.276 | -0.054 | 0.013 |
| 1233.84 |       |       |        |       |       |        |       |       |        |       |
| 4       | 194.7 | 0.737 | -0.006 | 0.442 | 2.152 | -0.085 | 0.023 | 0.625 | -0.014 | 0.710 |

Table S4. Annotated Metabolites within each enriched pathway based on mummichog

| pathway                            | Name                                                 | Adduct        | mz     | time | vip_OP | coef_OP | vip_PYR | coef_PYR | vip_OC | coef_OC | Metabolite Annotation Confidence |        |   |
|------------------------------------|------------------------------------------------------|---------------|--------|------|--------|---------|---------|----------|--------|---------|----------------------------------|--------|---|
| Tyrosine metabolism                | 3- (4-Hydroxyphenyl)pyruvate                         | M+2H[2+]      | 91.027 | 289  | 5      | .3      | 2.970   | -0.020   | 4.062  | -0.118  | 2.110                            | -0.065 | 3 |
|                                    | 3-Methoxy-4-hydroxyphenylacetaldehyde                | M[1+]         | 166.06 | 261  | 45     | .2      | 2.036   | -0.009   | 2.053  | -0.039  | 1.720                            | -0.034 | 3 |
|                                    | dGDP                                                 | M(C13)+2H[2+] | 215.02 | 252  | 34     | .1      | 2.200   | -0.017   | 1.935  | -0.065  | 2.240                            | -0.081 | 3 |
|                                    | 3'-monoiodo-L-thyronine                              | M(C13)+H[1+]  | 401.00 | 61.  | 86     | 7       | 2.615   | -0.024   | 0.484  | -0.017  | 2.263                            | -0.098 | 3 |
|                                    | 3,5,3',5'-tetraiodo-L-thyronine-beta-D-glucuronoside | M+HCOONa[1+]  | 1020.7 | 59.  | 04     | 7       | 2.574   | 0.008    | 1.801  | 0.022   | 2.419                            | 0.034  | 3 |
|                                    | 3-Methoxy-4-hydroxyphenylethylene glycol             | M+2H[2+]      | 93.044 | 134  | 8      | .6      | 2.109   | 0.013    | 2.833  | 0.073   | 2.018                            | 0.056  | 3 |
| Nitrogen metabolism                | L-Asparagine                                         | M+H[1+]       | 133.06 | 131  | 03     | .5      | 1.731   | 0.011    | 2.347  | 0.062   | 1.219                            | 0.032  | 3 |
|                                    | L-Asparagine                                         | M(C13)+H[1+]  | 134.06 | 112  | 4      | .7      | 1.576   | 0.010    | 2.137  | 0.054   | 1.138                            | 0.028  | 3 |
|                                    | L-Asparagine                                         | M+Na[1+]      | 155.04 | 114  | 27     | .9      | 1.987   | 0.011    | 2.031  | 0.045   | 1.580                            | 0.038  | 3 |
| Vitamin B6 (pyridoxine) metabolism | Pyridoxal                                            | M[1+]         | 167.05 | 116  | 66     | .3      | 1.122   | 0.010    | 2.167  | 0.085   | 1.050                            | 0.043  | 3 |
|                                    | Pyridoxamine                                         | M[1+]         | 168.09 | 70.  | 4      | 70.     | 2.027   | 0.014    | 3.306  | 0.098   | 1.569                            | 0.047  | 3 |
| Pyrimidine metabolism              | dTTP                                                 | M+2H[2+]      | 241.99 | 178  | 96     | .9      | 3.096   | -0.032   | 3.459  | -0.163  | 2.292                            | -0.113 | 3 |
|                                    | ITP                                                  | M+2H[2+]      | 254.99 | 97.  | 93     | 3       | 1.022   | -0.009   | 1.222  | -0.046  | 2.015                            | -0.083 | 3 |
|                                    | CDP                                                  | M(C13)+H[1+]  | 405.02 | 296  | 5      | .9      | 1.121   | -0.011   | 0.487  | -0.022  | 2.393                            | -0.118 | 3 |
|                                    |                                                      |               |        |      |        |         |         |          |        |         |                                  |        |   |
| Carnitine shuttle                  | Tetradecanoylcarnitine                               | M+H_[+1]      | 373.31 | 37   | 48     | 37      | 1.816   | -0.017   | 1.505  | -0.063  | 2.224                            | -0.099 | 3 |
|                                    | clupanodonyl carnitine                               | M+Na[1+]      | 496.33 | 58.  | 98     | 1       | 2.422   | 0.009    | 2.064  | 0.030   | 2.049                            | 0.030  | 3 |
|                                    | tetracosapentaenoyl carnitine                        | M+Na[1+]      | 524.37 | 57.  | 14     | 1       | 2.156   | 0.009    | 1.659  | 0.024   | 2.070                            | 0.035  | 3 |
|                                    | octadecenoyl carnitine                               | M+Na-2H[-]    | 445.31 | 66   | 206    | 66      | 2.604   | 0.031    | 2.731  | 0.149   | 1.369                            | 0.077  | 3 |
|                                    | stearidonyl carnitine                                | M+K-2H[-]     | 455.24 | 191  | 2      | .9      | 2.322   | -0.016   | 3.046  | -0.093  | 0.984                            | -0.030 | 3 |
|                                    | stearidonyl carnitine                                | M+K-2H[-]     | 455.24 | 68   | 52     | 52      | 2.027   | -0.021   | 1.233  | -0.056  | 2.211                            | -0.107 | 3 |
|                                    | Linoelaidyl carnitine                                | M+K-2H[-]     | 459.27 | 114  | 25     | .9      | 2.185   | 0.021    | 0.753  | 0.024   | 2.421                            | 0.108  | 3 |
|                                    | cervonyl carnitine                                   | M+K-2H[-]     | 507.27 | 156  | 16     | .6      | 2.151   | 0.015    | 1.555  | 0.046   | 2.314                            | 0.075  | 3 |
|                                    | pentadecanoyl Coenzyme A                             | M+Na[1+]      | 1010.2 | 8    | 77     | 8       | 2.149   | 0.018    | 2.657  | 0.099   | 2.790                            | 0.112  | 3 |
| Alanine and Aspartate Metabolism   | Pyruvic acid                                         | M-H           | 87.008 | 38.  | 7      | 6       | 2.024   | 0.019    | 1.539  | 0.064   | 1.674                            | 0.065  | 1 |
| Aminosugars metabolism             | 3-Oxopropanoate                                      | M-H+O[-]      | 103.00 | 128  | 37     | .1      | 1.917   | -0.016   | 1.415  | -0.053  | 2.657                            | -0.104 | 3 |
|                                    | N-Glycoloyl-neuraminate                              | M+Cl137[-]    | 362.06 | 36   | 37     | 37      | 0.835   | -0.007   | 1.687  | -0.064  | 3.829                            | -0.150 | 3 |
| Arachidonic acid metabolism        | Glycerol                                             | M+CH3COO[-]   | 151.06 | 12   | 275    | 12      | 1.691   | -0.014   | 2.270  | -0.086  | 0.869                            | -0.031 | 3 |
|                                    | 12 hydroxy arachidonic acid                          | M+CH3COO[-]   | 378.23 | 241  | 92     | .7      | 1.821   | -0.012   | 2.125  | -0.068  | 1.807                            | -0.057 | 3 |
| Arginine and Proline Metabolism    | L-Methionine                                         | M+Cl[-]       | 184.01 | 36.  | 94     | 6       | 2.124   | 0.015    | 3.676  | 0.111   | 1.680                            | 0.051  | 3 |

|                                                          |                                                  |             |              |            |       |        |       |        |       |        |   |
|----------------------------------------------------------|--------------------------------------------------|-------------|--------------|------------|-------|--------|-------|--------|-------|--------|---|
|                                                          | N-(L-Arginino)succinate                          | M+Cl37[-]   | 327.09<br>05 | 36.<br>5   | 2.308 | -0.017 | 1.726 | -0.053 | 1.383 | -0.043 | 3 |
| <b>Ascorbate (Vitamin C) and Aldarate Metabolism</b>     | L-Gulonate                                       | M-H2O-H[-]  | 177.04<br>05 | 282.<br>.6 | 2.586 | -0.016 | 3.683 | -0.102 | 2.456 | -0.071 | 3 |
|                                                          | D-Glucarate                                      | M-H+O[-]    | 225.02<br>42 | 68.<br>5   | 2.222 | -0.012 | 1.147 | -0.028 | 0.696 | -0.017 | 3 |
|                                                          | 5,6-Dihydroxyindole-2-carboxylate                | M+Cl37[-]   | 228.99<br>44 | 28.<br>4   | 2.688 | 0.024  | 0.728 | 0.030  | 1.566 | 0.066  | 3 |
| <b>Beta-Alanine metabolism</b>                           | Beta-Alanine                                     | M-H         | 88.040<br>4  | 47<br>41.  | 2.466 | 0.018  | 2.904 | 0.096  | 2.473 | 0.082  | 3 |
|                                                          | Dihydroxyacetone                                 | M+Cl[-]     | 125.00<br>11 | 41.<br>6   | 1.884 | 0.015  | 1.389 | 0.050  | 2.379 | 0.087  | 3 |
|                                                          | L-Histidine                                      | M-H[-]      | 154.06<br>23 | 50.<br>6   | 1.850 | 0.014  | 2.651 | 0.091  | 1.692 | 0.060  | 1 |
| <b>Butanoate metabolism</b>                              | 2-Methyl-3-oxopropanoate                         | M+CH3COO[-] | 161.04<br>56 | 278<br>.2  | 0.679 | -0.005 | 0.766 | -0.025 | 2.504 | -0.086 | 3 |
|                                                          | 4-Hydroxybutanoic acid                           | M+CH3COO[-] | 163.06<br>13 | 136<br>.8  | 0.763 | -0.007 | 0.532 | -0.023 | 2.024 | -0.089 | 3 |
| <b>Fatty acid activation</b>                             | Octanoic acid                                    | M+CH3COO[-] | 203.12<br>9  | 91.<br>6   | 2.816 | -0.023 | 2.372 | -0.087 | 1.932 | -0.073 | 3 |
|                                                          | pentadecanoate                                   | M(C13)-H[-] | 241.21<br>47 | 219<br>.1  | 1.851 | -0.017 | 2.336 | -0.104 | 0.983 | -0.042 | 3 |
|                                                          | Elaidic acid                                     | M-H         | 281.24<br>85 | 246<br>244 | 1.694 | -0.012 | 2.002 | -0.062 | 1.647 | -0.050 | 1 |
|                                                          | (9E)-Octadecenoic acid                           | M+HCOO[-]   | 327.25<br>41 | 240<br>.5  | 1.747 | -0.012 | 2.087 | -0.067 | 1.689 | -0.052 | 3 |
|                                                          | Phytanate                                        | M-H+O[-]    | 327.29<br>12 | 240<br>.2  | 1.292 | -0.011 | 2.651 | -0.108 | 1.061 | -0.044 | 3 |
|                                                          | (9E)-Octadecenoic acid                           | M+CH3COO[-] | 341.26<br>99 | 232<br>.9  | 1.770 | -0.012 | 2.080 | -0.066 | 1.697 | -0.052 | 3 |
| <b>Fructose and mannose metabolism</b>                   | Galactose                                        | M-2H[2-]    | 89.024<br>4  | 41.<br>1   | 1.951 | 0.018  | 1.504 | 0.062  | 2.356 | 0.098  | 3 |
|                                                          | 3-beta-D-Galactosyl-sn-glycerol                  | M-H+O[-]    | 269.08<br>78 | 45.<br>7   | 2.329 | 0.017  | 1.423 | 0.046  | 2.040 | 0.066  | 3 |
| <b>Glycerophospholipid metabolism</b>                    | CMP-2-aminoethylphosphonate                      | M-H+O[-]    | 445.05<br>37 | 76.<br>8   | 1.400 | -0.011 | 0.299 | -0.007 | 2.174 | -0.075 | 3 |
|                                                          | CMP-2-aminoethylphosphonate                      | M+Na-2H[-]  | 450.03<br>7  | 48.<br>6   | 1.491 | -0.015 | 1.351 | -0.062 | 2.001 | -0.096 | 3 |
| <b>Glycine, serine, alanine and threonine metabolism</b> | Phosphocreatine                                  | M+Br[-]     | 289.95<br>65 | 66.<br>4   | 1.588 | 0.008  | 1.394 | 0.032  | 2.584 | 0.061  | 3 |
|                                                          | Dihydroxyacetone                                 | M+Cl37[-]   | 126.99<br>82 | 42<br>77.  | 2.015 | 0.016  | 1.525 | 0.057  | 2.450 | 0.092  | 3 |
| <b>Glycolysis and Gluconeogenesis</b>                    | 2,3-Bisphospho-D-glycerate                       | M-H+O[-]    | 280.94<br>8  | 77.<br>7   | 2.523 | -0.013 | 2.402 | -0.057 | 2.563 | -0.063 | 3 |
|                                                          | S-acetyldihydrolipoyllysine                      | M+ACN-H[-]  | 289.10<br>59 | 26.<br>5   | 1.254 | 0.008  | 0.467 | 0.014  | 2.261 | 0.070  | 3 |
| <b>Methionine and cysteine metabolism</b>                | 2-keto-4-methylthiobutyrate                      | M+Cl[-]     | 182.98<br>88 | 54.<br>7   | 2.110 | 0.016  | 0.963 | 0.034  | 1.890 | 0.069  | 3 |
|                                                          | Adenosine 5'-phosphosulfate                      | M+K-2H[-]   | 462.96<br>33 | 89.<br>9   | 2.036 | -0.010 | 1.862 | -0.041 | 2.323 | -0.052 | 3 |
| <b>N-Glycan biosynthesis</b>                             | Isopentenyl diphosphate                          | M+Cl[-]     | 280.97<br>41 | 183<br>.1  | 1.918 | -0.005 | 1.397 | -0.016 | 2.069 | -0.023 | 3 |
| <b>Pentose phosphate pathway</b>                         | L-Gulonate                                       | M+Na-2H[-]  | 216.02<br>46 | 40.<br>5   | 0.845 | -0.008 | 1.236 | -0.056 | 2.129 | -0.100 | 3 |
| <b>Prostaglandin formation from arachidonate</b>         | Prostaglandin B1                                 | M+HCOO[-]   | 381.23<br>12 | 168<br>.3  | 2.236 | -0.022 | 1.200 | -0.053 | 1.911 | -0.087 | 3 |
|                                                          | Prostaglandin E2 ethanolamide                    | M-H+O[-]    | 410.25<br>75 | 200<br>.6  | 2.281 | -0.014 | 1.274 | -0.036 | 2.057 | -0.062 | 3 |
|                                                          | (5Z)-(15S)-11alpha-Hydroxy-9,15-dioxoprostanoate | M+Br81[-]   | 433.14<br>03 | 263<br>.5  | 2.404 | -0.013 | 3.206 | -0.078 | 1.846 | -0.045 | 3 |
|                                                          | 15-oxo-Prostaglandin E2 glyceryl ester           | M+Cl37[-]   | 461.20<br>79 | 175<br>.2  | 3.474 | 0.025  | 2.899 | 0.094  | 2.874 | 0.096  | 3 |

|                                      |                         |            |              |           |       |        |       |        |       |        |   |
|--------------------------------------|-------------------------|------------|--------------|-----------|-------|--------|-------|--------|-------|--------|---|
| <b>Pyruvate Metabolism</b>           | Dihydroxyacetone        | M-H[-]     | 90.027<br>7  | 41.<br>3  | 2.092 | 0.019  | 1.539 | 0.063  | 2.519 | 0.106  | 3 |
| <b>Selenoamino acid metabolism</b>   | Dithiothreitol          | M-H+O[-]   | 168.99<br>93 | 290<br>.5 | 1.675 | 0.012  | 0.300 | 0.010  | 2.208 | 0.074  | 3 |
|                                      | Oxidized dithiothreitol | M+Br81[-]  | 232.91<br>37 | 107<br>.7 | 2.722 | -0.013 | 3.464 | -0.072 | 2.753 | -0.059 | 3 |
| <b>Starch and Sucrose Metabolism</b> | Cellobiose              | M+Na-2H[-] | 362.08<br>06 | 48        | 0.836 | -0.005 | 1.014 | -0.038 | 2.006 | -0.075 | 3 |
| <b>Vitamin K metabolism</b>          | Phylloquinone           | M+Br[-]    | 529.26<br>84 | 248<br>.4 | 3.440 | -0.016 | 3.356 | -0.069 | 2.141 | -0.045 | 3 |
|                                      | Vitamin K1 epoxide      | M+Br[-]    | 545.26<br>83 | 186<br>.1 | 1.907 | 0.018  | 1.247 | 0.050  | 2.697 | 0.118  | 3 |



**Table S5. Enriched pathways associated with pesticide exposures**

| Pathways                                          | Overlap size | Pathway size | Ratio | P-value | Platform | Pesticide       |
|---------------------------------------------------|--------------|--------------|-------|---------|----------|-----------------|
| Tyrosine metabolism                               | 6            | 156          | 0.038 | 0.048   | HILICpos | Organophosphate |
| Beta-Alanine metabolism                           | 6            | 34           | 0.076 | 0.000   | C18neg   | Organophosphate |
| Glutamate metabolism                              | 5            | 33           | 0.052 | 0.003   | C18neg   | Organophosphate |
| Carnitine shuttle                                 | 6            | 53           | 0.013 | 0.005   | C18neg   | Organophosphate |
| Glycine, serine, alanine and threonine metabolism | 9            | 117          | 0.077 | 0.009   | C18neg   | Organophosphate |
| Prostaglandin formation from arachidonate         | 7            | 79           | 0.089 | 0.010   | C18neg   | Organophosphate |
| Histidine metabolism                              | 5            | 45           | 0.011 | 0.011   | C18neg   | Organophosphate |
| Arginine and Proline Metabolism                   | 7            | 82           | 0.085 | 0.011   | C18neg   | Organophosphate |
| Alanine and Aspartate Metabolism                  | 5            | 46           | 0.009 | 0.012   | C18neg   | Organophosphate |
| Pyruvate Metabolism                               | 3            | 24           | 0.025 | 0.028   | C18neg   | Organophosphate |
| Ascorbate (Vitamin C) and Aldarate Metabolism     | 5            | 62           | 0.081 | 0.031   | C18neg   | Organophosphate |
| Butanoate metabolism                              | 5            | 64           | 0.078 | 0.034   | C18neg   | Organophosphate |
| Methionine and cysteine metabolism                | 7            | 109          | 0.064 | 0.037   | C18neg   | Organophosphate |
| Fatty acid oxidation, peroxisome                  | 2            | 13           | 0.054 | 0.045   | C18neg   | Organophosphate |
| Glycolysis and Gluconeogenesis                    | 4            | 49           | 0.082 | 0.048   | C18neg   | Organophosphate |
| Glycine, serine, alanine and threonine metabolism | 6            | 75           | 0.080 | 0.056   | HILICpos | Pyrethroid      |
| Beta-Alanine metabolism                           | 4            | 34           | 0.018 | 0.025   | C18neg   | Pyrethroid      |
| Arachidonic acid metabolism                       | 5            | 53           | 0.094 | 0.030   | C18neg   | Pyrethroid      |
| Phytanic acid peroxisomal oxidation               | 3            | 22           | 0.036 | 0.033   | C18neg   | Pyrethroid      |
| Fatty acid activation                             | 5            | 59           | 0.085 | 0.040   | C18neg   | Pyrethroid      |
| Carnitine shuttle                                 | 4            | 45           | 0.089 | 0.010   | HILICpos | Organochlorine  |
| Pyrimidine metabolism                             | 4            | 74           | 0.054 | 0.042   | HILICpos | Organochlorine  |
| Glycolysis and Gluconeogenesis                    | 8            | 49           | 0.063 | 0.000   | C18neg   | Organochlorine  |
| Galactose metabolism                              | 7            | 44           | 0.059 | 0.000   | C18neg   | Organochlorine  |
| Pentose phosphate pathway                         | 7            | 50           | 0.040 | 0.002   | C18neg   | Organochlorine  |
| Fructose and mannose metabolism                   | 5            | 28           | 0.079 | 0.002   | C18neg   | Organochlorine  |
| Propanoate metabolism                             | 5            | 33           | 0.052 | 0.005   | C18neg   | Organochlorine  |
| Vitamin K metabolism                              | 2            | 4            | 0.000 | 0.005   | C18neg   | Organochlorine  |
| Glycine, serine, alanine and threonine metabolism | 10           | 117          | 0.085 | 0.009   | C18neg   | Organochlorine  |
| Sialic acid metabolism                            | 5            | 37           | 0.035 | 0.009   | C18neg   | Organochlorine  |
| N-Glycan Degradation                              | 3            | 14           | 0.014 | 0.011   | C18neg   | Organochlorine  |
| Starch and Sucrose Metabolism                     | 3            | 14           | 0.014 | 0.011   | C18neg   | Organochlorine  |

|                                |   |     |     |       |        |             |
|--------------------------------|---|-----|-----|-------|--------|-------------|
| Hexose phosphorylation         | 4 | 28  | 0.1 | 0.015 |        | Organochlor |
|                                |   |     | 43  | 63    | C18neg | ine         |
|                                |   |     | 0.0 | 0.017 |        | Organochlor |
| Glycerophospholipid metabolism | 9 | 111 | 81  | 73    | C18neg | ine         |
|                                |   |     | 0.0 | 0.025 |        | Organochlor |
| Butanoate metabolism           | 6 | 64  | 94  | 71    | C18neg | ine         |
|                                |   |     | 0.1 | 0.026 |        | Organochlor |
| Glutamate metabolism           | 4 | 33  | 21  | 47    | C18neg | ine         |
|                                |   |     | 0.1 | 0.026 |        | Organochlor |
| Selenoamino acid metabolism    | 4 | 33  | 21  | 47    | C18neg | ine         |
|                                |   |     | 0.1 | 0.028 |        | Organochlor |
| Beta-Alanine metabolism        | 4 | 34  | 18  | 57    | C18neg | ine         |
|                                |   |     | 0.1 | 0.040 |        | Organochlor |
| Caffeine metabolism            | 3 | 23  | 30  | 08    | C18neg | ine         |
|                                |   |     | 0.1 | 0.044 |        | Organochlor |
| N-Glycan biosynthesis          | 3 | 24  | 25  | 37    | C18neg | ine         |
|                                |   |     | 0.1 | 0.044 |        | Organochlor |
| Pyruvate Metabolism            | 3 | 24  | 25  | 37    | C18neg | ine         |
|                                |   |     | 0.1 | 0.046 |        | Organochlor |
| Aminosugars metabolism         | 4 | 40  | 00  | 38    | C18neg | ine         |

---

**Table S6. Enriched metabolic pathways associated with xMWAS cluster 1 (OP)**

| <b>Pathways</b>                                   | <b>Overlap size</b> | <b>Pathway size</b> | <b>P-value</b> | <b>Platform</b> |
|---------------------------------------------------|---------------------|---------------------|----------------|-----------------|
| Pyrimidine metabolism                             | 3                   | 74                  | 0.016<br>13    | HILICp<br>os    |
| Aspartate and asparagine metabolism               | 3                   | 98                  | 0.034<br>7     | HILICp<br>os    |
| Glycerophospholipid metabolism                    | 3                   | 109                 | 0.045<br>63    | HILICp<br>os    |
| Beta-Alanine metabolism                           | 5                   | 34                  | 0.000<br>17    | C18neg          |
| Glutathione Metabolism                            | 3                   | 12                  | 0.000<br>17    | C18neg          |
| Histidine metabolism                              | 4                   | 45                  | 0.001<br>09    | C18neg          |
| Glycine, serine, alanine and threonine metabolism | 6                   | 117                 | 0.001<br>09    | C18neg          |
| Glutamate metabolism                              | 3                   | 33                  | 0.004<br>12    | C18neg          |
| Arachidonic acid metabolism                       | 3                   | 53                  | 0.011<br>6     | C18neg          |
| Arginine and Proline Metabolism                   | 3                   | 82                  | 0.030<br>33    | C18neg          |

**Table S7. Enriched metabolic pathways associated with xMWAS cluster 2 (PYR, OC)**

| <b>Pathways</b>                               | <b>Overlap size</b> | <b>Pathway size</b> | <b>P-value</b> | <b>Platform</b> |
|-----------------------------------------------|---------------------|---------------------|----------------|-----------------|
| Saturated fatty acids beta-oxidation          | 4                   | 17                  | 0.000<br>25    | HILICp<br>os    |
| Di-unsaturated fatty acid beta-oxidation      | 4                   | 20                  | 0.000<br>34    | HILICp<br>os    |
| Carnitine shuttle                             | 3                   | 45                  | 0.010<br>92    | HILICp<br>os    |
| Fatty Acid Metabolism                         | 3                   | 50                  | 0.013<br>19    | HILICp<br>os    |
| Pentose phosphate pathway                     | 2                   | 50                  | 0.020<br>17    | C18neg          |
| Ascorbate (Vitamin C) and Aldarate Metabolism | 2                   | 62                  | 0.028<br>23    | C18neg          |
| Butanoate metabolism                          | 2                   | 64                  | 0.030<br>17    | C18neg          |

**Supplemental Table S8. Pathway enrichment analysis for features associated with all three pesticides in xMWAS**

| <b>Pathways</b>                               | <b>Overlap size</b> | <b>Pathway size</b> | <b>P-value</b> | <b>Platform</b> |
|-----------------------------------------------|---------------------|---------------------|----------------|-----------------|
| Di-unsaturated fatty acid beta-oxidation      | 3                   | 20                  | 0.0014         | HILICpos        |
| Carnitine shuttle                             | 3                   | 45                  | 0.0093         | HILICpos        |
| Selenoamino acid metabolism                   | 2                   | 33                  | 0.0105         | C18neg          |
| Glutamate metabolism                          | 2                   | 33                  | 0.0105         | C18neg          |
| Beta-Alanine metabolism                       | 2                   | 34                  | 0.0108         | C18neg          |
| Histidine metabolism                          | 2                   | 45                  | 0.0170         | C18neg          |
| Pentose phosphate pathway                     | 2                   | 50                  | 0.0202         | C18neg          |
| Ascorbate (Vitamin C) and Aldarate Metabolism | 2                   | 62                  | 0.0266         | C18neg          |
| Butanoate metabolism                          | 2                   | 64                  | 0.0286         | C18neg          |
